# Supplementary material
Source: publisher figshare collection journal article supplement (https://acs.figshare.com/ndownloader/files/5517002)
Supplement: Supplementary file 1 [file 5517002]

 
data_shelxl
 
_audit_creation_method            SHELXL-2013
_chemical_name_systematic
;
 ?
;
_chemical_name_common             ?
_chemical_melting_point           ?
_chemical_formula_moiety          ?
_chemical_formula_sum
 'C12 H11 F3 I N' 
_chemical_formula_weight          353.12

loop_
 _atom_type_symbol
 _atom_type_description
 _atom_type_scat_dispersion_real
 _atom_type_scat_dispersion_imag
 _atom_type_scat_source
 'C'  'C'   0.0033   0.0016
 'International Tables Vol C Tables 4.2.6.8 and 6.1.1.4'
 'F'  'F'   0.0171   0.0103
 'International Tables Vol C Tables 4.2.6.8 and 6.1.1.4'
 'I'  'I'  -0.4742   1.8119
 'International Tables Vol C Tables 4.2.6.8 and 6.1.1.4'
 'N'  'N'   0.0061   0.0033
 'International Tables Vol C Tables 4.2.6.8 and 6.1.1.4'
 'H'  'H'   0.0000   0.0000
 'International Tables Vol C Tables 4.2.6.8 and 6.1.1.4'
 
_space_group_crystal_system       orthorhombic
_space_group_IT_number            62
_space_group_name_H-M_alt         'P n m a'
_space_group_name_Hall            '-P 2ac 2n'
 
_shelx_space_group_comment
;
The symmetry employed for this shelxl refinement is uniquely defined
by the following loop, which should always be used as a source of
symmetry information in preference to the above space-group names.
They are only intended as comments.
;
 
loop_
 _space_group_symop_operation_xyz
 'x, y, z'
 '-x+1/2, -y, z+1/2'
 'x+1/2, -y+1/2, -z+1/2'
 '-x, y+1/2, -z'
 '-x, -y, -z'
 'x-1/2, y, -z-1/2'
 '-x-1/2, y-1/2, z-1/2'
 'x, -y-1/2, z'
 
_cell_length_a                    15.8119(12)
_cell_length_b                    7.3074(4)
_cell_length_c                    11.4308(5)
_cell_angle_alpha                 90
_cell_angle_beta                  90
_cell_angle_gamma                 90
_cell_volume                      1320.76(14)
_cell_formula_units_Z             4
_cell_measurement_temperature     294(2)
_cell_measurement_reflns_used     1236
_cell_measurement_theta_min       3.0648
_cell_measurement_theta_max       28.8254
 
_exptl_crystal_description        block 
_exptl_crystal_colour             ? 
_exptl_crystal_density_meas       ? 
_exptl_crystal_density_method     ?              
_exptl_crystal_density_diffrn     1.776          
_exptl_crystal_F_000              680
_exptl_transmission_factor_min    ?                                             
_exptl_transmission_factor_max    ?                                             
_exptl_crystal_size_max           0.360
_exptl_crystal_size_mid           0.320
_exptl_crystal_size_min           0.270
_exptl_absorpt_coefficient_mu     2.438
_shelx_estimated_absorpt_T_min    0.474
_shelx_estimated_absorpt_T_max    0.559
_exptl_absorpt_correction_type    'multi-scan' 
_exptl_absorpt_correction_T_min   0.94122
_exptl_absorpt_correction_T_max   1.00000
_exptl_absorpt_process_details  
;
CrysAlisPro, Agilent Technologies,
Version 1.171.36.21 (release 14-08-2012 CrysAlis171 .NET)
(compiled Sep 14 2012,17:21:16)
Empirical absorption correction using spherical harmonics,
 implemented in SCALE3 ABSPACK scaling algorithm.
;   
 
_exptl_special_details
;
 ?
;
 
_diffrn_ambient_temperature       294(2)
_diffrn_radiation_wavelength      0.71073
_diffrn_radiation_type            MoK\a
_diffrn_source                    'Enhance (Mo) X-ray Source'                       
_diffrn_measurement_device_type    'Gemini S Ultra, Agilent Technologies' 
_diffrn_measurement_method        '\w scans' 
_diffrn_detector_area_resol_mean  15.9149  
_diffrn_reflns_number             4216
_diffrn_reflns_av_unetI/netI      0.0273
_diffrn_reflns_av_R_equivalents   0.0244
_diffrn_reflns_limit_h_min        -19
_diffrn_reflns_limit_h_max        14
_diffrn_reflns_limit_k_min        -9
_diffrn_reflns_limit_k_max        9
_diffrn_reflns_limit_l_min        -14
_diffrn_reflns_limit_l_max        12
_diffrn_reflns_theta_min          3.133
_diffrn_reflns_theta_max          26.372
_diffrn_reflns_theta_full         25.242
_diffrn_measured_fraction_theta_max   0.997
_diffrn_measured_fraction_theta_full  0.997
_diffrn_reflns_Laue_measured_fraction_max    0.997
_diffrn_reflns_Laue_measured_fraction_full   0.997
_diffrn_reflns_point_group_measured_fraction_max   0.997
_diffrn_reflns_point_group_measured_fraction_full  0.997
_reflns_number_total              1452
_reflns_number_gt                 1162
_reflns_threshold_expression      'I > 2\s(I)'
_reflns_Friedel_coverage          0.000
_reflns_Friedel_fraction_max      .
_reflns_Friedel_fraction_full     .
 
_reflns_special_details
;
 Reflections were merged by SHELXL according to the crystal
 class for the calculation of statistics and refinement.
 
 _reflns_Friedel_fraction is defined as the number of unique
 Friedel pairs measured divided by the number that would be
 possible theoretically, ignoring centric projections and
 systematic absences.
;
 
_computing_data_collection        'CrysAlisPro (Agilent Technologies)'
_computing_cell_refinement        'CrysAlisPro (Agilent Technologies)'
_computing_data_reduction         'CrysAlisPro (Agilent Technologies)'
_computing_structure_solution     'SHELXS-97 (Sheldrick, 1997)'
_computing_structure_refinement   'SHELXL-2013 (Sheldrick, 2013)'
_computing_molecular_graphics     'Ortep-3 (L. J. Farrugia, 2001)'
_computing_publication_material   SHELXL-2013
 
_refine_special_details
;
 ?
;
_refine_ls_structure_factor_coef  Fsqd
_refine_ls_matrix_type            full
_refine_ls_weighting_scheme       calc
_refine_ls_weighting_details
'w=1/[\s^2^(Fo^2^)+(0.0371P)^2^+1.1434P] where P=(Fo^2^+2Fc^2^)/3'
_atom_sites_solution_primary      ?
_atom_sites_solution_secondary    ?
_atom_sites_solution_hydrogens    mixed
_refine_ls_hydrogen_treatment     constr
_refine_ls_extinction_method      none
_refine_ls_extinction_coef        .
_refine_ls_number_reflns          1452
_refine_ls_number_parameters      100
_refine_ls_number_restraints      0
_refine_ls_R_factor_all           0.0473
_refine_ls_R_factor_gt            0.0340
_refine_ls_wR_factor_ref          0.0870
_refine_ls_wR_factor_gt           0.0801
_refine_ls_goodness_of_fit_ref    1.032
_refine_ls_restrained_S_all       1.032
_refine_ls_shift/su_max           0.000
_refine_ls_shift/su_mean          0.000
 
loop_
 _atom_site_label
 _atom_site_type_symbol
 _atom_site_fract_x
 _atom_site_fract_y
 _atom_site_fract_z
 _atom_site_U_iso_or_equiv
 _atom_site_adp_type
 _atom_site_occupancy
 _atom_site_site_symmetry_order  
 _atom_site_calc_flag
 _atom_site_refinement_flags_posn
 _atom_site_refinement_flags_adp
 _atom_site_refinement_flags_occupancy
 _atom_site_disorder_assembly
 _atom_site_disorder_group
F1 F 0.4025(4) 0.7500 0.7897(5) 0.205(4) Uani 1 2 d S T P . .
F2 F 0.4880(3) 0.6101(6) 0.8843(4) 0.1699(19) Uani 1 1 d . . . . .
N1 N 0.7085(3) 0.7500 0.4378(4) 0.0504(10) Uani 1 2 d S T P . .
C1 C 0.6797(4) 0.7500 0.3295(5) 0.0629(14) Uani 1 2 d S T P . .
H1 H 0.7179 0.7500 0.2676 0.075 Uiso 1 2 calc R U P . .
C2 C 0.5942(4) 0.7500 0.3059(6) 0.0778(18) Uani 1 2 d S T P . .
H2 H 0.5756 0.7500 0.2287 0.093 Uiso 1 2 calc R U P . .
C3 C 0.5369(4) 0.7500 0.3942(6) 0.0733(17) Uani 1 2 d S T P . .
H3 H 0.4792 0.7500 0.3782 0.088 Uiso 1 2 calc R U P . .
C4 C 0.5662(4) 0.7500 0.5102(5) 0.0568(14) Uani 1 2 d S T P . .
C5 C 0.5101(4) 0.7500 0.6073(5) 0.0677(16) Uani 1 2 d S T P . .
H5 H 0.4520 0.7500 0.5942 0.081 Uiso 1 2 calc R U P . .
C6 C 0.5392(4) 0.7500 0.7176(5) 0.0632(15) Uani 1 2 d S T P . .
C7 C 0.6277(4) 0.7500 0.7380(5) 0.0652(15) Uani 1 2 d S T P . .
H7 H 0.6476 0.7500 0.8145 0.078 Uiso 1 2 calc R U P . .
C8 C 0.6837(4) 0.7500 0.6482(5) 0.0594(14) Uani 1 2 d S T P . .
H8 H 0.7416 0.7500 0.6631 0.071 Uiso 1 2 calc R U P . .
C9 C 0.6539(3) 0.7500 0.5325(4) 0.0491(12) Uani 1 2 d S T P . .
C10 C 0.4823(5) 0.7500 0.8200(7) 0.089(2) Uani 1 2 d S T P . .
C11 C 0.8016(4) 0.7500 0.4618(5) 0.0600(14) Uani 1 2 d S T P . .
H11A H 0.8150 0.8570 0.5084 0.072 Uiso 0.5 1 calc R U P . .
H11B H 0.8150 0.6430 0.5084 0.072 Uiso 0.5 1 calc R U P . .
C12 C 0.8570(4) 0.7500 0.3557(6) 0.084(2) Uani 1 2 d S T P . .
H12A H 0.9152 0.7500 0.3795 0.126 Uiso 1 2 d S U P . .
H12C H 0.8456 0.6427 0.3099 0.126 Uiso 1 1 d . U . . .
I1 I 0.77455(3) 0.7500 0.01750(3) 0.06572(19) Uani 1 2 d S T P . .
 
loop_
 _atom_site_aniso_label
 _atom_site_aniso_U_11
 _atom_site_aniso_U_22
 _atom_site_aniso_U_33
 _atom_site_aniso_U_23
 _atom_site_aniso_U_13
 _atom_site_aniso_U_12
F1 0.085(4) 0.429(12) 0.100(4) 0.000 0.037(3) 0.000
F2 0.223(5) 0.157(3) 0.130(3) 0.060(3) 0.105(3) 0.041(3)
N1 0.049(3) 0.051(2) 0.052(2) 0.000 -0.001(2) 0.000
C1 0.068(4) 0.070(3) 0.050(3) 0.000 0.003(3) 0.000
C2 0.070(4) 0.106(5) 0.057(4) 0.000 -0.012(3) 0.000
C3 0.062(4) 0.090(4) 0.069(4) 0.000 -0.011(3) 0.000
C4 0.055(3) 0.062(3) 0.054(3) 0.000 0.001(3) 0.000
C5 0.059(4) 0.075(4) 0.068(4) 0.000 0.002(3) 0.000
C6 0.066(4) 0.066(4) 0.057(3) 0.000 0.011(3) 0.000
C7 0.080(4) 0.067(4) 0.048(3) 0.000 -0.006(3) 0.000
C8 0.052(3) 0.068(3) 0.058(3) 0.000 -0.004(3) 0.000
C9 0.053(3) 0.043(3) 0.051(3) 0.000 0.000(2) 0.000
C10 0.081(6) 0.122(6) 0.065(4) 0.000 0.021(4) 0.000
C11 0.047(3) 0.065(3) 0.068(4) 0.000 0.000(3) 0.000
C12 0.066(4) 0.113(5) 0.073(4) 0.000 0.012(3) 0.000
I1 0.0744(3) 0.0635(3) 0.0593(3) 0.000 -0.00324(19) 0.000
 
_geom_special_details
;
 All esds (except the esd in the dihedral angle between two l.s. planes)
 are estimated using the full covariance matrix.  The cell esds are taken
 into account individually in the estimation of esds in distances, angles
 and torsion angles; correlations between esds in cell parameters are only
 used when they are defined by crystal symmetry.  An approximate (isotropic)
 treatment of cell esds is used for estimating esds involving l.s. planes.
;
 
loop_
 _geom_bond_atom_site_label_1
 _geom_bond_atom_site_label_2
 _geom_bond_distance
 _geom_bond_site_symmetry_2
 _geom_bond_publ_flag
F1 C10 1.308(9) . ?
F2 C10 1.262(5) . ?
N1 C1 1.320(7) . ?
N1 C9 1.385(7) . ?
N1 C11 1.496(7) . ?
C1 C2 1.378(8) . ?
C1 H1 0.9300 . ?
C2 C3 1.357(9) . ?
C2 H2 0.9300 . ?
C3 C4 1.405(8) . ?
C3 H3 0.9300 . ?
C4 C9 1.411(8) . ?
C4 C5 1.421(8) . ?
C5 C6 1.342(8) . ?
C5 H5 0.9300 . ?
C6 C7 1.418(8) . ?
C6 C10 1.477(9) . ?
C7 C8 1.357(8) . ?
C7 H7 0.9300 . ?
C8 C9 1.403(7) . ?
C8 H8 0.9300 . ?
C10 F2 1.262(5) 8_575 ?
C11 C12 1.496(8) . ?
C11 H11A 0.9700 . ?
C11 H11B 0.9700 . ?
C12 H12A 0.960(7) . ?
C12 H12C 0.959(4) . ?
 
loop_
 _geom_angle_atom_site_label_1
 _geom_angle_atom_site_label_2
 _geom_angle_atom_site_label_3
 _geom_angle
 _geom_angle_site_symmetry_1
 _geom_angle_site_symmetry_3
 _geom_angle_publ_flag
C1 N1 C9 121.2(5) . . ?
C1 N1 C11 120.8(5) . . ?
C9 N1 C11 118.0(4) . . ?
N1 C1 C2 121.6(6) . . ?
N1 C1 H1 119.2 . . ?
C2 C1 H1 119.2 . . ?
C3 C2 C1 120.6(6) . . ?
C3 C2 H2 119.7 . . ?
C1 C2 H2 119.7 . . ?
C2 C3 C4 118.8(6) . . ?
C2 C3 H3 120.6 . . ?
C4 C3 H3 120.6 . . ?
C3 C4 C9 119.7(5) . . ?
C3 C4 C5 122.1(6) . . ?
C9 C4 C5 118.2(5) . . ?
C6 C5 C4 121.3(6) . . ?
C6 C5 H5 119.4 . . ?
C4 C5 H5 119.4 . . ?
C5 C6 C7 119.5(6) . . ?
C5 C6 C10 122.4(6) . . ?
C7 C6 C10 118.1(6) . . ?
C8 C7 C6 121.3(5) . . ?
C8 C7 H7 119.3 . . ?
C6 C7 H7 119.3 . . ?
C7 C8 C9 119.6(5) . . ?
C7 C8 H8 120.2 . . ?
C9 C8 H8 120.2 . . ?
N1 C9 C8 121.8(5) . . ?
N1 C9 C4 118.2(5) . . ?
C8 C9 C4 120.0(5) . . ?
F2 C10 F2 108.2(7) 8_575 . ?
F2 C10 F1 102.9(5) 8_575 . ?
F2 C10 F1 102.9(5) . . ?
F2 C10 C6 114.7(4) 8_575 . ?
F2 C10 C6 114.7(4) . . ?
F1 C10 C6 112.2(7) . . ?
C12 C11 N1 115.3(5) . . ?
C12 C11 H11A 108.5 . . ?
N1 C11 H11A 108.5 . . ?
C12 C11 H11B 108.5 . . ?
N1 C11 H11B 108.5 . . ?
H11A C11 H11B 107.5 . . ?
C11 C12 H12A 109.4(6) . . ?
C11 C12 H12C 109.4(4) . . ?
H12A C12 H12C 109.5(5) . . ?
 
loop_
 _geom_torsion_atom_site_label_1
 _geom_torsion_atom_site_label_2
 _geom_torsion_atom_site_label_3
 _geom_torsion_atom_site_label_4
 _geom_torsion
 _geom_torsion_site_symmetry_1
 _geom_torsion_site_symmetry_2
 _geom_torsion_site_symmetry_3
 _geom_torsion_site_symmetry_4
 _geom_torsion_publ_flag
C9 N1 C1 C2 0.000(1) . . . . ?
C11 N1 C1 C2 180.000(1) . . . . ?
N1 C1 C2 C3 0.000(1) . . . . ?
C1 C2 C3 C4 0.000(1) . . . . ?
C2 C3 C4 C9 0.000(1) . . . . ?
C2 C3 C4 C5 180.000(1) . . . . ?
C3 C4 C5 C6 180.000(1) . . . . ?
C9 C4 C5 C6 0.000(1) . . . . ?
C4 C5 C6 C7 0.000(1) . . . . ?
C4 C5 C6 C10 180.000(1) . . . . ?
C5 C6 C7 C8 0.000(1) . . . . ?
C10 C6 C7 C8 180.000(1) . . . . ?
C6 C7 C8 C9 0.000(1) . . . . ?
C1 N1 C9 C8 180.000(1) . . . . ?
C11 N1 C9 C8 0.000(1) . . . . ?
C1 N1 C9 C4 0.000(1) . . . . ?
C11 N1 C9 C4 180.000(1) . . . . ?
C7 C8 C9 N1 180.000(1) . . . . ?
C7 C8 C9 C4 0.000(1) . . . . ?
C3 C4 C9 N1 0.000(1) . . . . ?
C5 C4 C9 N1 180.000(1) . . . . ?
C3 C4 C9 C8 180.000(1) . . . . ?
C5 C4 C9 C8 0.000(1) . . . . ?
C5 C6 C10 F2 -116.9(6) . . . 8_575 ?
C7 C6 C10 F2 63.1(6) . . . 8_575 ?
C5 C6 C10 F2 116.9(6) . . . . ?
C7 C6 C10 F2 -63.1(6) . . . . ?
C5 C6 C10 F1 0.000(2) . . . . ?
C7 C6 C10 F1 180.000(1) . . . . ?
C1 N1 C11 C12 0.000(1) . . . . ?
C9 N1 C11 C12 180.000(1) . . . . ?
 
_refine_diff_density_max    0.710
_refine_diff_density_min   -0.469
_refine_diff_density_rms    0.071

_shelxl_version_number 2013-4

_shelx_res_file
;
TITL lxy0605-CF3I Pnma
CELL  0.71073  15.8119   7.3074  11.4308   90.000   90.000   90.000
ZERR     4.00   0.0012   0.0004   0.0005    0.000    0.000    0.000
LATT   1
SYMM  1/2 - X, - Y, 1/2 + Z
SYMM  1/2 + X, 1/2 - Y, 1/2 - Z
SYMM  - X, 1/2 + Y, - Z
SFAC  C    F    I    N    H
UNIT  48   12   4    4    44
MERG   2
size 0.36 0.32 0.27
FMAP   2
PLAN   25
ACTA
BOND   $H
CONF
L.S.  15
shel 53 0.80
WGHT    0.037100    1.143400
FVAR       4.94445
F1    2    0.402473    0.750000    0.789656    10.50000    0.08548    0.42921 =
         0.10018    0.00000    0.03725    0.00000
F2    2    0.487960    0.610140    0.884300    11.00000    0.22271    0.15668 =
         0.13023    0.05964    0.10526    0.04101
N1    4    0.708541    0.750000    0.437794    10.50000    0.04854    0.05086 =
         0.05186    0.00000   -0.00061    0.00000
C1    1    0.679656    0.750000    0.329487    10.50000    0.06824    0.07048 =
         0.04995    0.00000    0.00289    0.00000
AFIX  43
H1    5    0.717874    0.750000    0.267645    10.50000   -1.20000
AFIX   0
C2    1    0.594166    0.750000    0.305856    10.50000    0.07034    0.10645 =
         0.05652    0.00000   -0.01173    0.00000
AFIX  43
H2    5    0.575601    0.750000    0.228656    10.50000   -1.20000
AFIX   0
C3    1    0.536868    0.750000    0.394192    10.50000    0.06165    0.08959 =
         0.06857    0.00000   -0.01052    0.00000
AFIX  43
H3    5    0.479195    0.750000    0.378222    10.50000   -1.20000
AFIX   0
C4    1    0.566178    0.750000    0.510231    10.50000    0.05509    0.06162 =
         0.05375    0.00000    0.00102    0.00000
C5    1    0.510089    0.750000    0.607308    10.50000    0.05928    0.07548 =
         0.06843    0.00000    0.00215    0.00000
AFIX  43
H5    5    0.452042    0.750000    0.594185    10.50000   -1.20000
AFIX   0
C6    1    0.539215    0.750000    0.717591    10.50000    0.06601    0.06623 =
         0.05749    0.00000    0.01055    0.00000
C7    1    0.627662    0.750000    0.738001    10.50000    0.07999    0.06704 =
         0.04846    0.00000   -0.00592    0.00000
AFIX  43
H7    5    0.647646    0.750000    0.814520    10.50000   -1.20000
AFIX   0
C8    1    0.683736    0.750000    0.648153    10.50000    0.05212    0.06782 =
         0.05836    0.00000   -0.00421    0.00000
AFIX  43
H8    5    0.741551    0.750000    0.663102    10.50000   -1.20000
AFIX   0
C9    1    0.653921    0.750000    0.532508    10.50000    0.05325    0.04259 =
         0.05134    0.00000    0.00049    0.00000
C10   1    0.482263    0.750000    0.820008    10.50000    0.08094    0.12243 =
         0.06455    0.00000    0.02054    0.00000
C11   1    0.801573    0.750000    0.461798    10.50000    0.04705    0.06452 =
         0.06832    0.00000   -0.00048    0.00000
AFIX  23
H11A  5    0.815042    0.857039    0.508397    10.50000   -1.20000
H11B  5    0.815042    0.642961    0.508397    10.50000   -1.20000
AFIX   0
C12   1    0.856993    0.750000    0.355694    10.50000    0.06577    0.11269 =
         0.07343    0.00000    0.01228    0.00000
H12A  5   10.915220   10.750000   10.379482    10.50000   -1.50000
H12C  5   10.845633   10.642734   10.309906    11.00000   -1.50000
I1    3    0.774550    0.750000    0.017504    10.50000    0.07437    0.06353 =
         0.05926    0.00000   -0.00324    0.00000
HKLF    4  1.0  1.00  0.00  0.00  0.00  0.00 -1.00  0.00  1.00  0.00

REM  lxy0605-CF3I Pnma
REM R1 =  0.0340 for    1162 Fo > 4sig(Fo)  and  0.0473 for all    1452 data
REM    100 parameters refined using      0 restraints

END

WGHT      0.0369      1.1247

REM Highest difference peak  0.710,  deepest hole -0.469,  1-sigma level  0.071
Q1    1   0.7816  0.7500 -0.0527  10.50000  0.05    0.71
Q2    1   0.5357  0.7500  0.9276  10.50000  0.05    0.65
Q3    1   0.7276  0.7500  0.0261  10.50000  0.05    0.54
Q4    1   0.4366  0.8678  0.8195  11.00000  0.05    0.43
Q5    1   0.7883  0.7500  0.0413  10.50000  0.05    0.38
Q6    1   0.4964  0.5620  0.8818  11.00000  0.05    0.31
Q7    1   0.7588  0.8804  0.0241  11.00000  0.05    0.31
Q8    1   0.7522  0.8844  0.0873  11.00000  0.05    0.25
Q9    1   0.5382  0.7500  0.5472  10.50000  0.05    0.25
Q10   1   0.5790  0.7500  0.7216  10.50000  0.05    0.24
Q11   1   0.6041  0.8194  0.5164  11.00000  0.05    0.22
Q12   1   0.7528  0.7500  0.4484  10.50000  0.05    0.21
Q13   1   0.9790  0.7500  0.3682  10.50000  0.05    0.20
Q14   1   0.3998  0.8109  0.7760  11.00000  0.05    0.19
Q15   1   0.8541  0.7500  0.0673  10.50000  0.05    0.19
Q16   1   0.4564  0.8259  0.3870  11.00000  0.05    0.19
Q17   1   0.7615  0.8965 -0.1052  11.00000  0.05    0.17
Q18   1   0.8052  0.8974  0.4669  11.00000  0.05    0.16
Q19   1   0.7344  0.7500  0.1201  10.50000  0.05    0.16
Q20   1   0.8230  0.8888  0.0088  11.00000  0.05    0.16
Q21   1   0.8912  0.7500  0.3278  10.50000  0.05    0.15
Q22   1   0.8079  0.5603  0.1826  11.00000  0.05    0.15
Q23   1   0.9329  0.8771  0.3489  11.00000  0.05    0.15
Q24   1   0.8495  0.9332  0.6054  11.00000  0.05    0.15
Q25   1   0.6832  0.8846  0.2113  11.00000  0.05    0.15
;
_shelx_res_checksum   21781

_shelx_hkl_file
;
   0   0  -8 36181.6 1878.32   2
   0   0  -7-264.841 288.054   2
   0   0  -6 223767. 4414.04   2
   0   0  -5 578.484 260.374   2
   0   0  -4 793381. 9381.45   2
   0   0  -3 73.5193 115.464   3
   0   0  -3 306.979 155.725   2
   0   0  -3 160.549 70.2448   1
   0   0   3 70.8590 52.5877   1
   0   0   4 758003. 7638.18   1
   0   0   5 461.270 286.044   3
   0   0   5-64.0210 50.9154   1
   0   0   6 237797. 4960.87   3
   0   0   7-45.4832 321.321   3
   0   0   8 41437.8 2305.24   3
   0   0   9 374.919 403.033   3
   0   1  -8 55.3012 314.371   2
   0   1  -7-251.083 266.922   2
   0  -1  -7 99.3333 227.908   2
   0  -1  -6 133.751 215.900   2
   0   1  -6 499.979 352.569   2
   0  -1  -5 768.766 266.335   2
   0  -1  -5 434.713 103.227   1
   0   1  -5 602.656 295.632   2
   0  -1  -4 25.6728 88.7561   1
   0  -1  -4 114.445 220.919   2
   0  -1  -3 8711.16 367.208   1
   0   1  -3 8949.95 575.713   3
   0  -1  -3 8509.20 496.548   2
   0  -1  -2 152.263 91.0773   1
   0  -1  -2 70.1980 106.630   2
   0   1  -2 83.8781 119.862   3
   0   1  -1 39661.2 761.774   3
   0  -1  -1 39333.6 710.420   1
   0  -1   2 241.943 77.5366   1
   0   1   2 195.339 82.4649   1
   0  -1   3 8824.22 317.454   1
   0   1   3 8403.59 361.511   1
   0   1   4 60.0614 107.005   1
   0  -1   4 62.5823 76.3006   1
   0  -1   5 923.122 422.440   3
   0  -1   5 479.794 85.7085   1
   0   1   5 597.054 133.342   1
   0   1   6 60.3551 352.631   3
   0  -1   6 16.5511 319.649   3
   0   1   7 542.421 406.139   3
   0  -1   7 229.584 411.529   3
   0  -1   8-19.9697 373.479   3
   0   1   8-59.5326 499.063   3
   0   1   9-116.604 467.185   3
   0   2  -9 258.928 368.189   2
   0   2  -8 12299.5 1189.37   2
   0   2  -7 52.3141 289.213   2
   0   2  -6 68985.9 2433.39   2
   0  -2  -5-64.4813 107.623   1
   0  -2  -4 203086. 2881.69   1
   0   2  -3-6.21065 124.197   3
   0  -2  -3 16.9740 112.690   1
   0   2  -2 474296. 5449.67   3
   0  -2  -2 462225. 5285.30   1
   0  -2  -1 281.520 130.274   1
   0  -2   0 610630. 6491.83   1
   0   2   2 447559. 5111.11   1
   0   2   2 465337. 4971.53   2
   0   2   3 271.510 138.577   1
   0   2   4 208061. 2935.84   1
   0  -2   4 207359. 2670.87   1
   0   2   5-86.9837 276.502   3
   0  -2   5 21.0721 67.7846   1
   0  -2   6 70700.8 2483.35   3
   0   2   6 75575.9 2603.65   3
   0  -2   7 172.507 351.903   3
   0   2   7 101.549 309.240   3
   0   2   8 16804.5 1498.85   3
   0   2   9 50.6711 330.503   3
   0   3  -9 562.788 438.529   2
   0   3  -8-35.0998 306.266   2
   0   3  -7 4589.50 766.087   2
   0  -3  -6 116.261 134.471   1
   0  -3  -5 27863.1 990.126   1
   0  -3  -4 16.0795 162.211   1
   0   3  -3 149922. 2681.97   3
   0  -3  -3 149171. 2498.64   1
   0  -3  -2 58.0474 158.833   1
   0   3  -2 410.724 168.980   3
   0  -3  -1 147687. 2389.03   1
   0  -3   0-39.2075 137.266   1
   0   3   2 251.670 134.072   1
   0   3   3 155962. 2578.59   1
   0   3   3 155189. 2913.95   3
   0   3   3 154787. 2405.96   2
   0  -3   4 38.3424 95.6514   1
   0   3   4-6.67924 309.285   3
   0   3   4-73.3965 105.932   1
   0   3   5 31324.1 1520.00   3
   0  -3   5 26267.7 805.440   1
   0   3   6 66.4566 368.028   3
   0  -3   6-0.47873 78.3983   1
   0   3   7 5455.04 856.747   3
   0   3   8-773.820 477.253   3
   0   4  -9-550.358 474.999   2
   0   4  -8 7964.74 1050.41   2
   0  -4  -6 41884.7 1379.83   1
   0  -4  -5 91.7679 146.920   1
   0  -4  -4 198274. 3382.72   1
   0  -4  -3 195.413 191.703   1
   0   4  -3 9.28558 150.092   3
   0  -4  -2 417047. 5482.99   1
   0   4  -2 424967. 5069.18   3
   0  -4  -1 39.6387 141.264   1
   0  -4   0 293349. 4146.69   1
   0   4   3 329.879 213.344   3
   0   4   3-52.1624 95.2274   2
   0   4   4 200437. 3805.80   3
   0   4   4 188473. 3025.12   2
   0  -4   5 39.1405 112.221   1
   0  -4   5-143.076 128.001   1
   0   4   5-98.9914 298.458   3
   0  -4   6 38586.2 1090.25   1
   0   4   6 39062.2 1928.44   3
   0   4   7 267.581 406.733   3
   0   4   8 9909.14 1179.71   3
   0   5  -9 333.231 347.711   2
   0   5  -8 196.147 345.106   2
   0  -5  -6 351.766 217.942   1
   0  -5  -5 21174.2 1052.87   1
   0  -5  -4 155.603 190.192   1
   0   5  -3 24620.1 985.438   3
   0  -5  -3 25054.4 1107.77   1
   0  -5  -2 147.518 174.920   1
   0   5  -2 85.6845 129.418   3
   0  -5  -1 83505.2 2052.00   1
   0  -5   0-75.7538 194.798   1
   0  -5   1 82574.1 1993.19   1
   0   5   3 27266.2 1168.23   3
   0  -5   4-285.430 179.654   1
   0   5   4-124.474 288.446   3
   0   5   4-180.374 121.571   2
   0  -5   5 19930.6 923.751   1
   0   5   5 18739.0 1207.70   3
   0  -5   6 17.2065 135.987   1
   0   5   6-102.958 338.300   3
   0   5   7 5429.91 807.395   3
   0   5   8-242.318 479.640   3
   0   6  -8 3953.89 841.326   2
   0  -6  -6 23728.2 1242.89   1
   0  -6  -5 187.362 257.338   1
   0  -6  -4 78983.9 2290.22   1
   0  -6  -3 163.254 237.893   1
   0   6  -2 155873. 2549.42   3
   0  -6  -2 158816. 3250.93   1
   0  -6  -1-148.603 223.884   1
   0  -6   0 215870. 3890.91   1
   0  -6   1 6.51127 194.583   1
   0  -6   2 159127. 3177.31   1
   0  -6   3-296.201 244.264   1
   0   6   4 77470.4 2320.01   3
   0   6   4 73050.7 1712.79   2
   0   6   5 536.559 356.441   3
   0  -6   5-182.019 202.601   1
   0   6   6 25130.6 1575.31   3
   0  -6   6 23307.5 1086.42   1
   0   6   7 93.3040 307.785   3
   0   6   8 5425.08 896.698   3
   0  -7  -6 232.906 256.349   1
   0  -7  -5 25725.7 1377.65   1
   0  -7  -4 13.4915 229.340   1
   0  -7  -3 54932.4 1970.83   1
   0  -7  -2 197.672 245.757   1
   0  -7  -1 149401. 3340.94   1
   0  -7   0-166.847 210.253   1
   0  -7   1 144168. 3227.45   1
   0  -7   2-9.31745 234.408   1
   0  -7   3 54442.0 1876.13   1
   0  -7   4 329.441 239.720   1
   0   7   4-28.9407 254.879   3
   0   7   5 25144.6 1457.95   3
   0  -7   5 26179.2 1277.47   1
   0   7   6-43.7460 364.192   3
   0   7   7 7794.12 1016.05   3
   0   7   8 865.196 501.810   3
   0  -8  -6 6122.89 741.303   1
   0  -8  -5 39.7762 295.039   1
   0  -8  -4 15863.5 1168.60   1
   0  -8  -3 55.7115 224.346   1
   0  -8  -2 30281.5 1527.67   1
   0  -8  -1 88.8823 222.180   1
   0  -8   0 64032.3 2213.11   1
   0  -8   1-87.1623 233.991   1
   0  -8   2 31493.8 1510.42   1
   0  -8   3-178.667 248.634   1
   0  -8   4 15044.4 1042.00   1
   0   8   4 13448.6 982.184   3
   0  -8   5 44.0881 230.742   1
   0   8   5 28.5879 260.851   3
   0   8   6 7939.84 946.708   3
   0   8   7-671.408 532.267   3
   0  -9  -6 231.135 236.721   1
   0  -9  -5 7760.76 892.649   1
   0  -9  -4-440.157 297.994   1
   0  -9  -3 30005.6 1651.29   1
   0  -9  -2 31.2163 296.023   1
   0  -9  -1 47296.4 2001.92   1
   0  -9   0 59.8531 319.073   1
   0  -9   1 46231.8 1984.95   1
   0  -9   2 361.161 310.330   1
   0   9   3 29045.9 1357.19   3
   0  -9   3 30476.8 1598.23   1
   0   9   4 102.307 282.614   3
   0  -9   4 155.009 298.157   1
   0   9   5 7882.13 862.341   3
   0  -9   5 8246.63 837.506   1
   0   9   6-265.106 330.794   3
   0   9   7 2634.69 648.523   3
   0 -10  -6 729.158 433.732   1
   0 -10  -5 163.238 334.797   1
   0 -10  -4 2423.62 498.712   1
   0 -10  -3-263.232 326.791   1
   0 -10  -2 7878.44 910.178   1
   0 -10  -1-326.025 328.088   1
   0 -10   0 13826.8 1156.72   1
   0 -10   1-800.411 473.826   1
   0 -10   2 8275.82 905.105   1
   0  10   3-36.7187 235.957   3
   0 -10   3 71.7795 301.297   1
   0 -10   4 2651.59 536.973   1
   0  10   4 1496.60 426.314   3
   0  10   5-60.8906 343.062   3
   0 -10   5-67.2275 282.917   1
   0  10   6 832.473 369.271   3
   0  10   7-588.290 421.194   3
   0 -11  -5 4673.11 771.001   1
   0 -11  -4 0.60515 366.544   1
   0 -11  -3 19114.7 1471.74   1
   0 -11  -2-92.1628 268.320   1
   0 -11  -1 23258.3 1590.97   1
   0 -11   0 134.071 310.039   1
   0 -11   1 21695.4 1502.75   1
   0 -11   2-199.612 279.253   1
   0 -11   3 17200.1 1352.83   1
   0 -11   4 501.263 352.059   1
   0 -11   5 5533.29 791.143   1
   0 -12  -5 246.384 302.968   1
   0 -12  -4 1019.62 505.009   1
   0 -12  -3 23.1590 318.784   1
   0 -12  -2 653.819 422.652   1
   0 -12  -1 463.957 408.578   1
   0 -12   0 827.232 449.541   1
   0 -12   1 130.149 349.962   1
   0 -12   2 575.741 389.269   1
   0 -12   3-389.589 349.038   1
   0 -12   4 270.047 340.119   1
   0 -12   5 26.3324 364.750   1
   0 -13  -5 1443.72 463.989   1
   0 -13  -4-631.345 539.085   1
   0 -13  -3 5281.86 951.324   1
   0 -13  -2 345.063 431.487   1
   0 -13  -1 9033.44 1107.01   1
   0 -13   0-277.903 324.214   1
   0 -13   1 8695.76 1083.83   1
   0 -13   2-585.659 296.360   1
   0 -13   3 5988.06 927.222   1
   0 -13   4 333.302 338.863   1
   0 -13   5 2225.91 580.909   1
   0 -14  -2 35.8285 408.191   1
   0 -14  -1-300.019 372.833   1
   0 -14   0 407.991 369.097   1
   0 -14   1 368.113 327.659   1
   0 -14   2 98.7297 377.594   1
   0 -14   3-448.351 492.829   1
  -1   0  -8-14.1331 407.294   2
   1   0  -8-344.891 455.851   2
   1   0  -7-227.510 270.651   2
  -1   0  -7-390.142 334.524   2
   1   0  -6 719.006 358.907   2
  -1   0  -6 356.417 382.083   2
  -1   0  -5-29.7152 185.048   2
   1   0  -5 32.3164 193.075   2
  -1   0  -4 297.566 364.222   2
  -1   0  -4 243.589 183.096   1
  -1   0  -3 58.3650 98.7601   1
  -1   0  -3-153.698 176.446   2
   1   0  -3 174.898 141.337   3
   1   0  -2 356.787 181.569   3
  -1   0  -2 473.318 157.837   1
  -1   0  -1 274.135 73.7277   1
   1   0   2 277.744 124.603   1
   1   0   3-27.7612 85.6564   1
   1   0   4 392.109 162.935   1
   1   0   5-329.032 279.431   3
   1   0   5-23.2338 87.6145   1
  -1   0   6 1276.92 645.553   3
   1   0   6 1157.56 502.010   3
  -1   0   7-218.171 355.126   3
   1   0   7-104.894 378.359   3
   1   0   8 409.808 458.564   3
  -1   0   8 262.723 522.566   3
   1   0   9-2899.37 748.756   3
  -1   1  -9 2332.62 538.563   2
  -1   1  -8 555.095 325.793   2
   1   1  -8 945.205 389.840   2
   1   1  -7 14703.1 1136.99   2
   1  -1  -7 15298.8 1069.11   2
  -1   1  -7 14451.6 1160.21   2
   1  -1  -6 6903.01 653.271   2
   1   1  -6 6391.42 713.987   2
  -1   1  -6 6669.27 740.121   2
  -1  -1  -6 6014.17 672.329   2
  -1  -1  -6 6068.29 381.235   1
  -1   1  -5 55947.6 1945.00   2
   1  -1  -5 58018.9 1704.24   2
  -1  -1  -5 59289.9 1273.15   1
  -1  -1  -5 59533.0 1838.61   2
   1  -1  -4 63910.4 1598.57   2
  -1  -1  -4 64812.7 1311.86   1
   1  -1  -4 62383.9 1004.54   1
  -1  -1  -4 65702.3 1759.52   2
  -1   1  -4 63983.7 1901.85   2
   1   1  -3 133433. 2504.21   3
   1  -1  -3 134593. 2152.04   2
   1  -1  -3 124717. 1661.61   1
  -1  -1  -3 127630. 2328.96   2
  -1  -1  -3 129737. 1944.56   1
   1  -1  -2 145790. 1952.61   2
  -1  -1  -2 145026. 2001.78   1
   1   1  -2 147332. 2314.93   3
   1  -1  -2 145619. 1792.33   1
   1  -1  -2 142160. 2320.75   3
   1   1  -1 130034. 1548.88   1
  -1  -1  -1 128919. 1733.57   1
   1   1   2 147238. 2248.46   2
   1   1   2 145342. 2041.58   1
   1  -1   2 148781. 1973.04   1
   1  -1   3 133170. 1899.65   1
   1   1   3 127517. 1963.27   1
   1   1   4 65711.4 1347.55   1
   1  -1   4 67341.2 1268.26   1
   1  -1   5 60269.1 2064.38   3
  -1   1   5 59625.8 2075.69   3
  -1  -1   5 61031.6 2076.56   3
   1  -1   5 57003.9 1179.76   1
   1   1   5 57839.9 1288.62   1
   1   1   6 7506.15 829.745   3
   1  -1   6 8373.12 848.414   3
  -1   1   6 7059.45 832.162   3
  -1  -1   6 6442.93 803.082   3
  -1  -1   7 13840.9 1223.70   3
   1   1   7 14933.5 1279.08   3
   1  -1   7 15028.1 1257.08   3
  -1   1   7 15979.4 1309.07   3
   1   1   8 1205.16 504.645   3
   1  -1   8 859.539 518.075   3
  -1   1   8 1580.69 651.623   3
   1  -1   9 3438.82 791.745   3
  -1   1   9 3418.02 770.431   3
   1   1   9 1174.55 561.325   3
  -1   2  -9 303.256 319.463   2
   1   2  -8 78.8012 332.676   2
  -1   2  -8-151.141 469.153   2
  -1   2  -7 315.247 315.043   2
   1   2  -7-60.2611 241.237   2
  -1   2  -6 1320.39 409.549   2
  -1  -2  -6 977.744 224.286   1
   1  -2  -5 74.7725 146.619   2
  -1  -2  -5 216.295 166.823   1
  -1   2  -5-23.3569 295.883   2
   1  -2  -5 1.72020 99.9176   1
  -1  -2  -4 2099.00 291.555   1
   1  -2  -4 2043.78 236.701   1
   1  -2  -4 1867.94 262.784   2
  -1   2  -3 11474.2 645.139   3
   1  -2  -3 10360.7 456.897   1
   1   2  -3 10226.5 625.225   3
  -1  -2  -3 10256.3 519.579   1
  -1   2  -2 2913.03 283.417   3
   1   2  -2 2687.11 295.861   3
  -1  -2  -2 2439.04 265.112   1
   1  -2  -2 2967.77 268.367   1
  -1   2  -1 51165.0 860.582   3
  -1  -2  -1 54146.4 1129.45   1
  -1  -2   0 5616.98 324.007   1
  -1   2   1 54038.5 1008.24   3
  -1  -2   1 53678.2 1034.70   1
  -1   2   2 2971.57 190.278   2
   1   2   2 2712.73 256.983   1
   1  -2   2 2668.29 270.326   3
  -1  -2   2 2829.87 216.629   1
   1  -2   3 10510.4 634.942   3
  -1  -2   3 10626.2 392.693   1
   1   2   3 10628.2 583.011   2
   1   2   3 9282.90 491.253   1
   1  -2   3 10987.6 498.149   1
   1   2   4 2008.14 258.616   1
   1  -2   4 2313.72 249.612   1
  -1  -2   4 1990.53 167.379   1
  -1  -2   4 1629.75 146.058   1
  -1   2   5 129.298 278.245   3
  -1  -2   5 487.810 291.961   3
   1   2   5 16.4014 106.046   1
   1  -2   5 623.933 336.324   3
   1  -2   5 34.0251 98.9001   1
   1   2   5-52.6215 257.221   3
  -1   2   6 2603.84 640.960   3
   1  -2   6 1721.06 469.876   3
   1   2   6 1315.37 535.188   3
  -1   2   7 318.292 407.822   3
   1  -2   7-121.357 354.621   3
   1   2   7 307.633 429.508   3
   1   2   8-254.269 416.322   3
  -1   2   8 959.856 507.565   3
   1  -2   8 613.327 484.741   3
  -1   3  -9 2083.21 618.545   2
   1   3  -9 3354.80 714.785   2
  -1   3  -8 821.523 427.068   2
   1   3  -8-88.7344 354.446   2
  -1   3  -7 21326.9 1518.98   2
  -1   3  -6 1281.06 443.924   2
  -1  -3  -6 2270.36 320.449   1
  -1  -3  -5 103111. 2173.03   1
   1  -3  -5 104765. 1984.66   1
  -1  -3  -4 838.167 239.035   1
   1  -3  -4 465.880 170.657   1
  -1   3  -3 340536. 4559.63   3
  -1  -3  -3 332854. 4473.43   1
   1   3  -2 5941.41 429.232   3
   1  -3  -2 6142.15 416.620   1
  -1  -3  -2 5800.79 431.914   1
  -1   3  -2 6251.05 376.337   3
  -1  -3  -1 820318. 8880.41   1
  -1   3  -1 807728. 8074.32   3
  -1  -3   0 106428. 1905.36   1
  -1  -3   1 828583. 8883.20   1
   1   3   2 6507.51 443.824   1
  -1   3   2 6565.41 445.492   3
  -1  -3   2 6013.50 385.069   1
   1   3   3 336196. 4387.17   2
   1   3   3 336332. 4474.18   1
  -1   3   3 337604. 4794.36   3
   1  -3   3 322699. 4532.48   3
  -1  -3   3 326790. 4100.11   1
   1   3   4 684.664 304.023   3
   1   3   4 709.559 210.262   2
   1   3   4 790.390 202.125   1
   1  -3   4 618.442 168.932   1
  -1  -3   4 411.845 126.672   1
  -1   3   4 983.779 320.876   3
   1   3   5 101828. 2150.65   1
  -1  -3   5 99892.8 1596.74   1
   1   3   5 108062. 2912.54   3
  -1   3   5 103549. 2870.75   3
   1  -3   5 100234. 1919.86   1
  -1  -3   5 100512. 1605.22   1
  -1   3   6 1756.79 529.873   3
   1  -3   6 1564.47 460.395   3
   1   3   6 1173.27 398.235   3
   1  -3   7 23542.9 1588.92   3
  -1   3   7 23771.8 1605.99   3
   1   3   7 23828.5 1604.91   3
   1   3   8-365.918 411.943   3
  -1   3   8 642.665 401.945   3
   1   4  -9-973.077 576.037   2
  -1   4  -9 122.263 375.842   2
  -1   4  -8 1493.69 510.384   2
   1   4  -8 1059.09 459.522   2
  -1   4  -7-303.052 402.207   2
  -1  -4  -6 5834.02 551.716   1
  -1  -4  -5 231.028 154.672   1
   1  -4  -5 51.1390 155.426   1
  -1  -4  -4 20776.8 967.456   1
   1  -4  -4 21594.4 930.183   1
  -1  -4  -3 1226.50 279.352   1
   1  -4  -3 1469.39 282.416   1
  -1   4  -3 1201.02 229.629   3
   1  -4  -2 41736.7 1291.74   1
  -1   4  -2 41670.3 1026.33   3
  -1  -4  -2 42806.9 1324.77   1
  -1  -4  -1 2909.97 337.496   1
   1  -4  -1 2463.08 308.367   1
  -1  -4   0 46858.0 1325.49   1
  -1  -4   1 2959.33 331.703   1
  -1  -4   2 41273.4 1199.71   1
   1   4   2 42639.4 1313.43   1
  -1   4   2 41350.6 1186.67   3
  -1   4   3 1142.25 158.203   2
  -1   4   3 1027.72 268.956   3
  -1  -4   3 1142.54 216.296   1
  -1  -4   4 22305.9 840.909   1
  -1   4   4 20144.2 1104.34   3
   1   4   4 21629.1 1174.49   3
   1   4   4 20168.2 901.761   2
  -1   4   5 293.493 247.888   3
  -1  -4   5 201.797 140.111   1
   1   4   5-79.8695 286.587   3
  -1  -4   5 326.995 144.990   1
   1  -4   5 305.142 157.157   1
   1   4   6 5596.80 790.576   3
  -1   4   6 6804.83 815.870   3
  -1   4   7 423.251 396.171   3
   1   4   7-275.325 398.459   3
   1   4   8 1823.67 584.778   3
  -1   4   8 980.200 540.949   3
   1   5  -9 1328.16 585.374   2
  -1   5  -8 395.338 357.881   2
  -1  -5  -6 2455.71 421.451   1
  -1  -5  -5 42657.2 1565.17   1
   1  -5  -5 43399.4 1523.22   1
  -1  -5  -4 694.759 276.848   1
   1  -5  -4 694.638 266.183   1
  -1   5  -3 100626. 2048.55   3
  -1  -5  -3 101473. 2412.30   1
   1  -5  -3 99022.3 2328.55   1
  -1  -5  -2 1889.95 330.658   1
   1  -5  -2 2502.49 370.359   1
  -1   5  -2 2251.69 247.960   3
   1  -5  -1 131668. 2691.82   1
  -1  -5  -1 131963. 2680.96   1
  -1  -5   0 26387.2 1072.36   1
  -1  -5   1 132090. 2622.38   1
  -1   5   2 2649.33 321.087   3
  -1  -5   2 1901.93 324.598   1
  -1   5   3 103754. 2351.15   3
  -1  -5   3 105066. 2258.57   1
  -1   5   4 1104.76 352.732   3
   1   5   4 601.432 185.534   2
  -1  -5   4 683.933 204.417   1
   1   5   4 1097.98 348.115   3
  -1   5   4 525.604 146.642   2
  -1  -5   5 42427.5 1303.95   1
  -1   5   5 43651.8 1842.45   3
   1   5   5 42432.9 1855.65   3
  -1   5   6 1535.32 466.493   3
   1   5   6 1758.11 483.285   3
   1   5   7 9209.63 1098.79   3
  -1   5   7 9871.23 1094.20   3
   1   5   8 35.5989 342.501   3
  -1   5   8 865.422 504.790   3
  -1   6  -8 700.244 533.716   2
   1  -6  -6 8060.32 709.275   1
  -1  -6  -6 8214.91 763.628   1
   1  -6  -5 79.3000 199.261   1
  -1  -6  -5 34.6628 217.323   1
   1  -6  -4 32040.9 1396.65   1
  -1  -6  -4 32140.8 1434.94   1
  -1   6  -3 7623.95 524.598   3
  -1  -6  -3 9461.38 769.489   1
   1  -6  -3 8990.80 739.471   1
   1  -6  -2 77149.2 2158.88   1
  -1   6  -2 74501.5 1488.34   3
  -1  -6  -2 77181.8 2172.42   1
   1  -6  -1 657.993 234.334   1
  -1  -6  -1 561.542 243.173   1
  -1  -6   0 98061.5 2402.44   1
   1  -6   0 97864.0 2432.10   1
  -1  -6   1 694.934 260.778   1
  -1  -6   2 78781.6 2115.65   1
  -1  -6   3 8106.53 647.913   1
  -1   6   3 8418.15 634.837   3
  -1   6   4 33541.6 1457.57   3
  -1  -6   4 33317.5 1295.52   1
   1   6   4 31990.3 1500.48   3
  -1   6   4 29321.9 918.542   2
   1   6   5 21.8668 285.467   3
  -1  -6   5 208.135 202.712   1
  -1   6   5-31.5353 295.675   3
  -1   6   6 9268.19 988.896   3
   1  -6   6 9311.31 719.883   1
   1   6   6 9386.45 978.211   3
  -1   6   7 150.999 430.123   3
   1   6   7 27.6267 285.021   3
  -1   6   8 2495.12 649.919   3
   1   6   8 1472.93 571.371   3
  -1   7  -8 944.911 563.214   2
   1  -7  -6 187.659 303.181   1
  -1  -7  -6-328.843 278.834   1
  -1  -7  -5 23525.0 1325.77   1
   1  -7  -5 20636.6 1234.42   1
   1  -7  -4 695.889 323.313   1
  -1  -7  -4 668.332 375.098   1
   1  -7  -3 66675.4 2153.60   1
  -1  -7  -3 63247.0 2149.61   1
   1  -7  -2 4467.02 553.523   1
  -1   7  -2 3739.67 313.243   3
  -1  -7  -2 3737.16 566.251   1
   1  -7  -1 104275. 2717.23   1
  -1  -7  -1 103415. 2690.00   1
  -1  -7   0 402.291 270.532   1
   1  -7   0 610.054 324.809   1
   1  -7   1 102725. 2674.31   1
  -1  -7   1 100297. 2618.27   1
  -1  -7   2 4404.53 545.640   1
  -1   7   3 65909.4 1908.79   3
  -1  -7   3 64893.2 2047.71   1
   1   7   4 372.912 276.864   3
  -1  -7   4 282.947 244.292   1
  -1   7   4 354.018 317.007   3
  -1   7   4 328.436 126.634   2
   1   7   5 22620.3 1404.88   3
  -1   7   5 22429.4 1370.33   3
   1  -7   5 21740.5 1188.85   1
  -1  -7   5 22000.6 1140.21   1
  -1   7   6 29.9450 328.357   3
   1   7   6-367.421 342.883   3
   1  -7   6-63.3980 188.916   1
   1   7   7 6145.17 902.757   3
  -1   7   7 4196.26 729.564   3
   1   7   8 91.6440 341.361   3
  -1   7   8-84.8791 538.639   3
  -1  -8  -6 9069.54 895.043   1
   1  -8  -6 8519.15 874.610   1
  -1  -8  -5 348.285 294.481   1
   1  -8  -5 843.337 357.761   1
   1  -8  -4 29155.2 1521.80   1
  -1  -8  -4 30970.5 1615.07   1
  -1  -8  -3 834.378 305.632   1
   1  -8  -3 502.483 334.039   1
  -1  -8  -2 58815.6 2156.39   1
   1  -8  -2 58327.7 2124.94   1
  -1   8  -2 52235.0 1251.85   3
   1  -8  -1 334.749 248.109   1
  -1  -8  -1-75.9535 258.779   1
  -1  -8   0 74199.0 2363.91   1
   1  -8   0 72841.1 2378.14   1
   1  -8   1 71.8762 226.023   1
  -1  -8   1-64.5789 248.474   1
   1  -8   2 55179.2 2048.95   1
  -1  -8   2 59513.5 2082.57   1
   1  -8   3 1415.11 402.657   1
  -1  -8   3 418.882 292.406   1
  -1   8   3 812.045 287.745   3
  -1  -8   4 29717.4 1444.43   1
   1  -8   4 27371.6 1429.91   1
   1   8   4 25967.5 1431.23   3
  -1   8   4 27687.9 1398.82   3
   1  -8   5 1064.06 367.896   1
  -1  -8   5 679.029 305.437   1
  -1   8   5 1193.29 334.387   3
   1   8   5 654.194 383.598   3
   1   8   6 8873.60 953.016   3
  -1   8   6 9609.51 1027.17   3
  -1   8   7-14.9348 304.168   3
   1   8   7 884.928 489.889   3
  -1   8   8 816.732 466.658   3
  -1  -9  -6-119.285 285.025   1
   1  -9  -5 9220.82 957.695   1
  -1  -9  -5 10507.5 1005.26   1
   1  -9  -4 3906.70 619.117   1
  -1  -9  -4 5029.17 703.985   1
  -1  -9  -3 22849.3 1449.88   1
   1  -9  -3 21789.6 1403.56   1
   1  -9  -2 6339.45 766.784   1
  -1  -9  -2 6436.25 756.952   1
  -1  -9  -1 35283.7 1731.22   1
   1  -9  -1 34285.8 1723.89   1
   1  -9   0 3295.31 539.457   1
  -1  -9   0 2993.04 533.522   1
  -1  -9   1 34576.2 1690.70   1
   1  -9   1 35402.5 1734.75   1
  -1  -9   2 7066.85 773.437   1
   1  -9   2 6581.79 738.012   1
  -1   9   2 6880.26 563.176   3
  -1  -9   3 23273.8 1385.03   1
   1  -9   3 23803.8 1427.25   1
  -1   9   3 21451.3 1124.03   3
  -1   9   4 3851.13 562.500   3
   1  -9   4 5656.60 707.601   1
   1   9   4 4151.79 625.400   3
  -1  -9   4 4078.27 607.642   1
  -1   9   5 10013.9 954.981   3
   1   9   5 8773.45 912.124   3
  -1  -9   5 10041.5 907.564   1
   1  -9   5 9404.48 900.168   1
   1   9   6 526.344 381.732   3
  -1   9   6 279.447 332.584   3
  -1   9   7 2549.28 667.299   3
   1   9   7 3579.26 698.640   3
  -1 -10  -6 5572.70 846.220   1
   1 -10  -5 566.153 373.339   1
  -1 -10  -5 93.7543 310.752   1
  -1 -10  -4 24485.2 1615.42   1
   1 -10  -4 24974.9 1599.24   1
   1 -10  -3 2473.84 573.690   1
  -1 -10  -3 1654.26 452.654   1
   1 -10  -2 53005.9 2293.49   1
  -1 -10  -2 55128.0 2363.34   1
   1 -10  -1 480.770 349.074   1
  -1 -10  -1 1110.44 430.715   1
  -1 -10   0 71855.8 2654.99   1
   1 -10   0 80560.6 2839.34   1
  -1 -10   1 1111.73 395.597   1
   1 -10   1 1365.09 430.401   1
  -1 -10   2 58370.6 2347.51   1
   1 -10   2 58527.7 2389.68   1
  -1  10   2 55946.0 1696.88   3
  -1  10   3 1494.12 339.850   3
   1 -10   3 1439.41 398.870   1
  -1 -10   3 1243.03 440.689   1
  -1  10   4 28133.5 1443.91   3
  -1 -10   4 26585.7 1568.40   1
   1  10   4 26865.6 1503.41   3
   1 -10   4 26928.2 1619.48   1
  -1  10   5-123.423 311.971   3
  -1 -10   5 279.441 282.684   1
   1 -10   5 98.8158 349.752   1
   1  10   5 725.583 367.438   3
  -1  10   6 7468.68 911.261   3
   1  10   6 7703.97 963.105   3
   1  10   7 557.426 399.993   3
  -1  10   7 291.976 358.636   3
  -1 -11  -6 568.517 402.358   1
  -1 -11  -5 2049.11 549.982   1
   1 -11  -5 1946.70 529.676   1
   1 -11  -4 291.679 326.022   1
  -1 -11  -4 200.637 331.808   1
   1 -11  -3 5514.10 784.344   1
  -1 -11  -3 3255.91 650.717   1
   1 -11  -2 159.085 386.787   1
  -1 -11  -2 323.923 363.987   1
  -1 -11  -1 7249.44 896.217   1
   1 -11  -1 7921.26 954.907   1
   1 -11   0 240.837 340.987   1
  -1 -11   0 661.837 387.104   1
   1 -11   1 7452.81 929.624   1
  -1 -11   1 7312.76 890.963   1
   1 -11   2 389.433 336.383   1
  -1 -11   2-106.507 318.168   1
   1 -11   3 3605.10 645.764   1
  -1 -11   3 3455.62 641.277   1
   1 -11   4 263.611 324.741   1
  -1 -11   4 578.667 431.635   1
   1  11   4-136.485 251.919   3
  -1 -11   5 2609.39 561.333   1
   1  11   5 1707.06 466.796   3
   1 -11   5 2158.33 602.649   1
   1 -12  -5 791.977 388.259   1
  -1 -12  -5-51.2519 392.990   1
  -1 -12  -4 8854.40 1121.77   1
   1 -12  -4 7399.39 1019.41   1
  -1 -12  -3 1132.30 467.753   1
   1 -12  -3 235.177 326.104   1
  -1 -12  -2 15898.1 1425.87   1
   1 -12  -2 17377.0 1481.61   1
  -1 -12  -1 3108.67 683.560   1
   1 -12  -1 2280.79 619.005   1
  -1 -12   0 21350.3 1598.39   1
   1 -12   0 19475.3 1530.94   1
  -1 -12   1 1487.56 477.576   1
   1 -12   1 2583.82 616.836   1
   1 -12   2 15847.7 1405.75   1
  -1 -12   2 17995.9 1464.05   1
  -1 -12   3 507.409 379.496   1
   1 -12   3 34.6938 338.651   1
   1 -12   4 7960.28 995.931   1
  -1 -12   4 9596.88 1057.69   1
  -1 -12   5 709.252 362.898   1
   1 -12   5 132.659 337.536   1
   1 -13  -5 621.502 410.899   1
  -1 -13  -4 46.9776 353.981   1
   1 -13  -4-318.182 328.285   1
  -1 -13  -3 348.284 314.442   1
   1 -13  -3 1137.23 568.199   1
  -1 -13  -2-211.697 384.242   1
   1 -13  -2 155.187 377.523   1
   1 -13  -1 154.130 396.274   1
  -1 -13  -1-285.347 496.805   1
   1 -13   0 123.501 322.945   1
  -1 -13   0-684.610 513.773   1
  -1 -13   1-186.610 333.322   1
   1 -13   1 478.145 462.053   1
   1 -13   2 248.066 315.098   1
  -1 -13   2-188.835 386.481   1
  -1 -13   3 22.5090 389.135   1
   1 -13   3-243.547 371.925   1
  -1 -13   4 950.896 510.651   1
   1 -13   4 432.895 319.785   1
   1 -13   5-258.114 343.955   1
   1 -14  -2 8509.63 1151.84   1
  -1 -14  -1 402.970 442.536   1
   1 -14  -1-135.853 519.262   1
  -1 -14   0 7448.80 1072.41   1
   1 -14   0 9882.64 1231.40   1
  -1 -14   1-113.140 388.961   1
   1 -14   1-208.069 335.447   1
  -1 -14   2 7826.78 1081.75   1
   1 -14   2 10066.1 1226.50   1
   1 -14   3-397.299 465.196   1
  -1 -14   3 86.6140 335.007   1
  -1 -14   4 4811.48 890.463   1
  -2   0  -7-325.711 281.610   2
   2   0  -7-1.58968 225.983   2
  -2   0  -6 54548.8 2094.52   2
   2   0  -6 53182.2 1904.13   2
  -2   0  -5 1014.08 193.273   1
  -2   0  -5 30.0898 219.293   2
  -2   0  -4 264592. 4396.95   2
  -2   0  -4 263494. 3552.84   1
  -2   0  -3 9767.70 629.554   2
  -2   0  -3 9173.10 459.904   1
   2   0  -2 502115. 5838.54   3
  -2   0  -2 489898. 5482.24   1
  -2   0  -1 1312.00 154.494   1
   2   0  -1 1024.98 95.0472   1
   2   0   1 1033.70 154.733   2
   2   0   2 507071. 5585.28   1
   2   0   2 507226. 6025.69   2
   2   0   3 9967.86 475.652   1
   2   0   4 277010. 3656.01   1
   2   0   5 381.156 146.463   1
   2   0   5 253.630 268.193   3
   2   0   6 56701.3 2242.90   3
  -2   0   6 60243.3 2315.14   3
   2   0   7 285.048 319.370   3
  -2   0   7 56.5920 366.009   3
   2   0   8 12590.6 1261.23   3
   2   0   9-417.632 395.336   3
  -2   1  -9 249.359 300.139   2
  -2   1  -8 891.135 483.989   2
   2   1  -8 367.311 296.997   2
  -2   1  -7 1303.72 474.517   2
   2   1  -7 1703.87 424.644   2
   2  -1  -7 1727.66 368.858   2
  -2  -1  -6 320.688 148.693   1
   2  -1  -6 409.516 210.685   2
  -2   1  -6 721.541 408.170   2
  -2  -1  -5 5651.84 618.241   2
   2  -1  -5 5298.21 512.513   2
  -2   1  -5 4848.54 620.690   2
  -2  -1  -5 6030.25 444.467   1
  -2  -1  -4 3629.24 449.993   2
   2  -1  -4 3427.38 351.079   2
  -2   1  -4 2586.79 404.405   2
  -2  -1  -4 3337.83 327.992   1
  -2  -1  -3 8154.65 466.132   1
   2  -1  -3 8374.30 296.786   1
   2   1  -2 2458.67 137.799   1
   2  -1  -2 2206.90 269.285   3
  -2  -1  -2 2636.28 251.726   1
   2   1  -2 2607.61 290.507   3
   2  -1  -1 201376. 2554.24   3
   2   1  -1 202624. 2362.51   1
  -2  -1  -1 203721. 2624.21   1
   2  -1   0 651.460 101.279   2
  -2  -1   1 209682. 2419.02   1
   2   1   2 2520.75 283.626   2
   2   1   2 2580.72 245.050   1
  -2  -1   2 2329.47 131.615   1
   2  -1   2 2622.03 237.040   1
   2   1   3 8476.02 574.323   2
   2  -1   3 7904.03 433.720   1
   2   1   3 7879.90 448.091   1
   2   1   4 3048.33 304.855   1
   2  -1   4 2979.32 278.829   1
   2  -1   5 6557.24 724.672   3
   2  -1   5 5213.78 397.072   1
   2   1   5 5784.43 430.659   1
   2   1   5 6021.15 690.288   3
  -2   1   5 5566.02 668.092   3
  -2  -1   5 6755.30 743.426   3
  -2   1   6 827.885 374.360   3
   2  -1   6 1497.54 463.097   3
   2   1   6 516.827 335.037   3
  -2   1   7 1164.75 446.760   3
   2  -1   7 1421.00 457.319   3
   2   1   7 1700.95 564.766   3
   2   1   8-86.7556 339.779   3
  -2   1   8 466.752 507.047   3
   2  -1   8-253.293 457.277   3
   2   1   9 388.567 398.716   3
   2  -1   9 907.698 552.214   3
  -2   2  -9 50.2593 305.989   2
   2   2  -8 10081.9 1052.70   2
  -2   2  -8 11380.5 1187.06   2
  -2   2  -7 2626.03 532.764   2
   2   2  -7 2415.56 545.439   2
   2  -2  -6 67083.6 1926.16   2
  -2   2  -6 68201.9 2470.23   2
  -2  -2  -6 67187.5 1679.33   1
  -2   2  -5 12214.9 968.073   2
   2  -2  -5 13005.0 710.087   2
  -2  -2  -5 12328.2 667.800   1
   2  -2  -5 11943.0 440.101   1
  -2   2  -4 242786. 4365.82   2
  -2  -2  -4 236890. 3505.33   1
   2  -2  -4 234461. 3010.96   1
   2  -2  -4 237556. 3341.08   2
   2  -2  -3 40212.0 883.058   2
  -2  -2  -3 39891.3 1121.28   1
   2  -2  -3 38042.8 913.316   1
  -2  -2  -2 626052. 7059.53   1
   2  -2  -2 633066. 7126.97   3
  -2  -2  -1 55742.4 1212.39   1
   2   2  -1 55101.7 1087.61   1
   2  -2  -1 55534.9 1036.18   3
   2  -2   1 58393.3 917.234   3
  -2  -2   1 57065.8 1109.05   1
  -2   2   1 58126.7 1070.99   3
   2  -2   2 626034. 6948.01   1
   2   2   2 633965. 7027.33   1
  -2  -2   2 617470. 6565.65   1
   2  -2   2 632007. 6872.83   3
  -2   2   2 627743. 7100.54   3
   2  -2   3 40294.1 1068.12   1
   2   2   3 39023.7 1223.10   2
  -2   2   3 40215.9 1315.51   3
  -2  -2   3 38534.1 763.510   1
   2   2   3 38270.3 1103.85   1
   2  -2   3 40560.3 1234.58   3
  -2   2   4 239538. 4277.20   3
   2  -2   4 245954. 3478.76   1
  -2   2   5 12747.0 987.422   3
   2   2   5 12643.0 964.660   3
   2   2   5 11873.4 659.164   1
   2  -2   5 12114.0 609.779   1
   2  -2   5 11848.6 901.784   3
   2   2   6 62812.9 2437.09   3
  -2   2   6 70958.5 2544.05   3
   2  -2   6 67289.7 2406.31   3
  -2   2   7 1995.46 546.547   3
   2  -2   7 2536.56 596.389   3
   2   2   7 2353.52 616.836   3
  -2   2   8 11921.8 1264.49   3
   2  -2   8 15698.0 1397.56   3
   2   2   8 13814.0 1336.36   3
   2  -2   9 192.943 382.747   3
  -2   3  -9 349.877 392.334   2
   2   3  -9 794.001 383.510   2
  -2   3  -8-663.029 408.889   2
   2   3  -8-53.8221 340.468   2
  -2   3  -7 3057.16 627.117   2
  -2   3  -6 376.425 316.865   2
  -2  -3  -6 436.687 226.196   1
  -2  -3  -5 11094.2 687.047   1
   2  -3  -5 10471.3 549.270   1
  -2   3  -5 11341.7 956.717   2
  -2  -3  -4 3017.14 372.656   1
   2  -3  -4 2782.68 304.433   1
   2  -3  -3 14900.8 669.599   1
  -2  -3  -3 16569.2 782.145   1
  -2  -3  -2 15769.3 728.627   1
  -2  -3  -1 144730. 2438.06   1
   2   3  -1 146094. 2331.76   1
  -2  -3   0 26060.8 876.025   1
  -2   3   1 144971. 2002.02   3
  -2  -3   1 147057. 2320.21   1
  -2   3   2 14675.9 657.454   3
  -2  -3   2 14433.8 591.339   1
   2  -3   2 15771.9 592.375   3
   2   3   2 14909.4 703.853   1
   2  -3   3 16417.6 719.994   1
   2   3   3 16137.4 767.477   2
   2   3   3 15864.8 764.150   1
  -2  -3   3 16467.1 604.345   1
   2  -3   3 16581.2 773.680   3
  -2   3   3 17376.8 882.667   3
  -2  -3   4 2636.11 232.328   1
   2   3   4 2793.00 341.662   1
   2  -3   4 2691.92 306.700   1
  -2   3   4 2855.62 447.410   3
  -2  -3   5 10539.4 360.283   1
  -2   3   5 11879.8 944.887   3
   2  -3   5 11229.7 634.569   1
   2  -3   5 11710.7 887.380   3
  -2  -3   5 9630.95 347.966   1
   2   3   5 12521.0 1012.32   3
   2  -3   6 375.667 345.896   3
   2   3   6 660.711 390.391   3
  -2   3   6 579.746 413.535   3
  -2   3   7 4649.79 769.556   3
   2   3   7 3952.80 706.683   3
   2  -3   7 4061.81 702.658   3
   2   3   8 613.231 437.460   3
   2  -3   8-102.635 315.875   3
  -2   3   8 541.360 335.601   3
   2   4  -9-227.703 355.670   2
  -2   4  -9-250.205 433.237   2
  -2   4  -8 6972.63 997.772   2
  -2   4  -7 663.774 390.701   2
  -2  -4  -6 39312.9 1468.45   1
  -2   4  -6 40032.6 2042.85   2
  -2  -4  -5 2526.97 386.969   1
   2  -4  -5 2097.82 321.571   1
   2  -4  -4 87631.4 1989.03   1
  -2  -4  -4 89023.4 2193.76   1
   2  -4  -3 7055.72 537.932   1
  -2  -4  -3 7584.06 585.678   1
  -2  -4  -2 260717. 3989.18   1
  -2   4  -2 258890. 3286.92   3
   2  -4  -2 253847. 3874.27   1
  -2   4  -1 6706.29 235.910   3
  -2  -4  -1 7690.88 547.693   1
   2   4  -1 7630.95 524.288   1
  -2  -4   0 702253. 8163.02   1
  -2  -4   1 7301.14 510.601   1
  -2   4   1 7220.29 356.627   3
  -2  -4   2 248827. 3608.00   1
  -2   4   2 252143. 3547.80   3
   2  -4   3 8036.10 537.677   3
  -2   4   3 7684.02 598.822   3
  -2  -4   3 7313.82 474.712   1
  -2  -4   4 88668.4 1759.34   1
  -2   4   4 88346.8 2401.97   3
  -2   4   5 2238.34 447.746   3
   2  -4   5 1216.20 330.908   3
  -2  -4   5 2014.69 234.028   1
   2   4   5 2113.99 477.606   3
   2  -4   6 44215.8 1897.95   3
   2   4   6 40410.9 1963.47   3
  -2   4   6 39611.6 1929.95   3
   2   4   7 457.475 469.156   3
  -2   4   7 233.084 361.087   3
  -2   4   8 8632.39 1082.89   3
   2   4   8 8803.61 1144.97   3
   2   5  -9 1925.21 591.982   2
  -2   5  -8 174.460 367.695   2
  -2   5  -7 5886.63 935.173   2
  -2  -5  -6 2326.49 427.533   1
   2  -5  -5 24180.3 1097.25   1
  -2  -5  -5 24934.5 1220.11   1
   2  -5  -4 6415.06 568.933   1
  -2  -5  -4 6192.98 604.898   1
   2  -5  -3 111748. 2514.76   1
  -2  -5  -3 115258. 2635.29   1
  -2   5  -3 113522. 2170.00   3
   2  -5  -2 13043.8 790.562   1
  -2  -5  -2 12825.8 797.480   1
  -2   5  -2 12904.5 509.212   3
  -2   5  -1 135795. 1632.92   3
  -2  -5  -1 145423. 2860.84   1
  -2  -5   0 28800.2 1143.66   1
  -2  -5   1 142864. 2748.07   1
  -2   5   1 143244. 2087.50   3
  -2  -5   2 12989.4 728.791   1
  -2   5   2 12286.4 631.763   3
  -2  -5   3 115187. 2324.02   1
  -2   5   3 113396. 2449.44   3
  -2   5   4 5904.90 613.738   3
  -2  -5   4 5651.47 475.899   1
   2   5   5 26595.6 1481.13   3
  -2  -5   5 25043.0 955.568   1
  -2   5   5 28392.6 1467.86   3
   2   5   6 3447.00 637.619   3
  -2   5   6 3458.95 633.695   3
   2   5   7 6837.00 957.016   3
  -2   5   7 5585.66 858.437   3
  -2   5   8 812.794 543.505   3
   2   5   8 563.722 527.473   3
  -2   6  -8 2972.71 771.746   2
  -2   6  -7 662.063 432.392   2
  -2  -6  -6 17024.9 1115.83   1
  -2  -6  -5 2969.78 457.909   1
   2  -6  -5 2112.88 405.156   1
  -2  -6  -4 54019.2 1935.91   1
   2  -6  -4 55088.0 1838.88   1
   2  -6  -3 5147.48 549.112   1
  -2   6  -3 4065.29 372.527   3
  -2  -6  -3 5051.01 577.256   1
   2  -6  -2 150047. 3179.49   1
  -2  -6  -2 155977. 3298.45   1
  -2   6  -2 150406. 2176.50   3
  -2  -6  -1 14794.9 917.361   1
   2  -6  -1 14893.0 925.439   1
  -2   6  -1 14083.8 375.519   3
  -2  -6   0 229036. 4026.33   1
  -2  -6   1 14562.9 874.414   1
  -2   6   1 15257.3 581.274   3
  -2   6   2 149274. 2597.05   3
  -2  -6   2 150072. 3022.86   1
  -2   6   3 4633.74 482.088   3
  -2  -6   3 4269.05 473.574   1
  -2   6   4 50365.1 1048.95   2
  -2   6   4 54695.0 1880.28   3
  -2  -6   4 53585.6 1632.20   1
   2   6   5 1934.40 484.495   3
  -2  -6   5 2158.12 324.537   1
  -2   6   5 2852.50 522.612   3
   2   6   6 17453.8 1325.95   3
  -2   6   6 19097.4 1362.39   3
  -2   6   7 1409.08 509.751   3
   2   6   7 960.886 465.438   3
  -2   6   8 3876.21 783.095   3
   2   6   8 3910.17 826.699   3
  -2   7  -8-737.381 561.799   2
  -2  -7  -6 1055.75 310.052   1
  -2  -7  -5 26176.1 1434.08   1
   2  -7  -5 27430.2 1388.45   1
  -2  -7  -4 2582.15 507.428   1
   2  -7  -4 3050.36 490.066   1
  -2  -7  -3 85194.2 2520.45   1
   2  -7  -3 86658.0 2492.78   1
  -2   7  -3 80941.8 1750.25   3
   2  -7  -2 4940.79 601.950   1
  -2   7  -2 4622.35 303.811   3
  -2  -7  -2 5480.63 645.181   1
   2  -7  -1 94017.9 2593.02   1
  -2   7  -1 90364.0 1278.13   3
  -2  -7  -1 97275.7 2631.89   1
  -2  -7   0 5709.11 605.277   1
  -2  -7   1 98084.1 2553.62   1
  -2   7   1 94787.7 1717.33   3
  -2  -7   2 5056.60 574.107   1
  -2   7   2 4867.23 435.305   3
  -2   7   3 83671.3 2150.42   3
  -2  -7   3 86873.9 2356.09   1
  -2  -7   4 2596.73 403.208   1
  -2   7   4 2491.52 476.192   3
   2   7   5 26028.4 1530.53   3
  -2   7   5 26624.6 1476.98   3
  -2  -7   5 26279.7 1231.95   1
   2   7   6 1058.98 433.747   3
  -2   7   6 1528.92 490.270   3
  -2   7   7 4163.48 790.839   3
   2   7   7 5554.59 890.941   3
   2   7   8 305.890 454.891   3
  -2   7   8-8.56837 404.266   3
  -2  -8  -6 1851.87 464.556   1
   2  -8  -5 826.495 358.486   1
  -2  -8  -5 287.834 269.133   1
   2  -8  -4 11875.6 979.452   1
  -2  -8  -4 14140.6 1098.80   1
   2  -8  -3 2413.23 443.405   1
  -2  -8  -3 1688.15 433.897   1
   2  -8  -2 30897.8 1555.38   1
  -2  -8  -2 31570.4 1593.93   1
  -2   8  -2 27963.2 757.905   3
   2  -8  -1 6100.33 689.804   1
  -2   8  -1 4723.06 234.616   3
  -2  -8  -1 4998.87 637.725   1
  -2  -8   0 18487.2 1172.39   1
   2  -8   0 20971.1 1277.07   1
  -2   8   1 5435.07 384.241   3
  -2  -8   1 4725.43 632.451   1
  -2  -8   2 29054.1 1423.30   1
  -2   8   2 28908.0 1064.04   3
  -2  -8   3 3189.99 514.743   1
  -2   8   3 2311.50 375.132   3
  -2  -8   4 12750.8 948.550   1
  -2   8   4 13815.8 976.093   3
  -2  -8   5 991.936 284.091   1
   2  -8   5 1023.01 342.679   1
  -2   8   5 1303.57 378.668   3
   2   8   5 737.699 351.914   3
   2  -8   6 2588.43 518.020   1
  -2   8   6 2860.62 579.438   3
   2   8   6 2761.22 637.817   3
  -2   8   7-563.808 380.147   3
   2   8   7-68.4098 371.042   3
  -2   8   8 710.336 406.765   3
  -2  -9  -6 2393.87 550.423   1
   2  -9  -5 12596.1 1131.92   1
  -2  -9  -5 14397.8 1219.66   1
  -2  -9  -4 11479.0 1061.15   1
   2  -9  -4 12224.9 1065.14   1
   2  -9  -3 25413.0 1500.31   1
  -2  -9  -3 27709.9 1617.65   1
  -2  -9  -2 26258.3 1556.19   1
   2  -9  -2 24834.6 1487.97   1
   2  -9  -1 40329.0 1899.28   1
  -2  -9  -1 42552.7 1922.59   1
   2  -9   0 30697.4 1643.31   1
  -2  -9   0 30253.5 1589.80   1
   2  -9   1 44482.0 1970.53   1
  -2   9   1 43530.0 1147.72   3
  -2  -9   1 42710.0 1893.19   1
  -2  -9   2 26827.4 1476.38   1
  -2   9   2 26360.7 1038.80   3
   2  -9   2 27290.6 1543.25   1
   2  -9   3 26673.7 1522.64   1
  -2  -9   3 25267.7 1424.53   1
  -2   9   3 23862.6 1148.54   3
   2  -9   4 10003.2 959.112   1
  -2  -9   4 11951.8 988.032   1
  -2   9   4 11354.2 909.016   3
  -2   9   5 13316.4 1079.20   3
  -2  -9   5 12231.3 987.910   1
   2  -9   5 14085.8 1148.19   1
   2   9   5 14270.2 1203.56   3
   2   9   6 2575.68 614.586   3
  -2   9   6 2176.06 502.193   3
  -2   9   7 2000.14 550.519   3
   2   9   7 3360.22 724.090   3
  -2 -10  -6-103.712 288.723   1
   2 -10  -5 477.969 317.785   1
  -2 -10  -5 806.342 421.400   1
   2 -10  -4-14.3556 327.858   1
  -2 -10  -4 260.038 264.117   1
  -2 -10  -3 867.535 462.447   1
   2 -10  -3 1161.45 404.578   1
   2 -10  -2 77.0155 337.243   1
  -2 -10  -2 619.578 382.682   1
  -2 -10  -1 963.100 396.865   1
   2 -10  -1 2111.45 511.427   1
   2 -10   0 380.947 330.901   1
  -2 -10   0 435.059 362.477   1
  -2 -10   1 544.472 335.955   1
   2 -10   1 1723.74 515.107   1
   2 -10   2 236.042 337.702   1
  -2 -10   2 304.948 354.867   1
   2 -10   3 468.349 356.061   1
  -2 -10   3 900.266 377.138   1
  -2  10   4 403.862 284.102   3
  -2 -10   4 334.156 314.247   1
   2 -10   4 439.320 377.092   1
  -2 -10   5 1057.21 390.902   1
   2 -10   5 139.968 265.727   1
  -2  10   5 548.178 330.197   3
   2  10   5 523.357 424.030   3
   2  10   6-200.207 473.390   3
  -2  10   6 913.686 375.256   3
   2  10   7 76.2905 400.480   3
  -2 -11  -6 478.834 389.611   1
  -2 -11  -5 5692.55 874.278   1
   2 -11  -5 6946.44 922.942   1
  -2 -11  -4 1333.57 490.653   1
   2 -11  -4 1216.23 509.467   1
  -2 -11  -3 13314.2 1252.06   1
   2 -11  -3 14428.4 1284.36   1
   2 -11  -2 1282.41 516.069   1
  -2 -11  -2 2449.10 575.909   1
   2 -11  -1 27102.7 1725.60   1
  -2 -11  -1 29560.6 1795.38   1
   2 -11   0 2623.66 604.434   1
  -2 -11   0 1741.13 517.633   1
   2 -11   1 29122.8 1786.96   1
  -2 -11   1 28058.4 1732.49   1
  -2 -11   2 2213.15 536.388   1
   2 -11   2 2254.97 590.841   1
   2 -11   3 14346.5 1268.44   1
  -2 -11   3 13911.3 1206.41   1
   2 -11   4 1050.52 423.934   1
  -2 -11   4 1343.14 437.884   1
   2  11   5 6396.83 846.754   3
   2 -11   5 6792.90 938.167   1
  -2 -11   5 5521.68 782.671   1
   2  11   6 567.922 411.002   3
  -2 -12  -6-808.396 470.830   1
  -2 -12  -5 76.0805 282.619   1
   2 -12  -5-361.300 388.353   1
   2 -12  -4-684.705 410.333   1
  -2 -12  -4 997.268 544.109   1
  -2 -12  -3 931.142 478.342   1
   2 -12  -3 562.441 342.914   1
   2 -12  -2-107.699 337.572   1
  -2 -12  -2 897.135 461.364   1
  -2 -12  -1-278.754 427.777   1
   2 -12  -1 529.200 368.955   1
  -2 -12   0 1542.63 461.008   1
   2 -12   0 1502.57 521.661   1
  -2 -12   1 558.415 387.354   1
   2 -12   1 157.302 348.680   1
   2 -12   2 709.539 487.894   1
  -2 -12   2 152.613 355.846   1
   2 -12   3-773.809 502.586   1
  -2 -12   3 159.809 303.854   1
  -2 -12   4 653.852 408.125   1
   2 -12   4 380.545 329.501   1
  -2 -12   5 211.335 291.454   1
   2 -12   5 69.9182 328.332   1
   2 -13  -5 1580.04 524.128   1
  -2 -13  -4 1055.99 401.614   1
   2 -13  -4 848.062 435.499   1
   2 -13  -3 5592.42 920.618   1
  -2 -13  -3 6762.00 993.807   1
   2 -13  -2 747.495 457.154   1
  -2 -13  -2 1172.53 459.376   1
   2 -13  -1 11545.5 1257.02   1
  -2 -13  -1 11443.8 1286.38   1
   2 -13   0 1547.55 549.734   1
  -2 -13   0 1719.98 541.212   1
   2 -13   1 12053.9 1300.57   1
  -2 -13   1 11357.8 1238.23   1
   2 -13   2 1532.24 548.125   1
  -2 -13   2 422.508 366.185   1
  -2 -13   3 6709.09 976.336   1
   2 -13   3 7529.70 1042.07   1
  -2 -13   4 1307.34 496.972   1
   2 -13   4 275.826 374.804   1
   2 -13   5 2223.57 619.408   1
   2 -14  -1-54.4104 434.706   1
  -2 -14  -1-174.729 390.845   1
   2 -14   0-404.160 446.537   1
  -2 -14   0 237.424 365.413   1
  -2 -14   1-525.171 445.140   1
   2 -14   1-625.604 394.484   1
   2 -14   2 453.055 458.232   1
  -2 -14   2-566.249 396.881   1
  -2 -14   3-527.022 453.439   1
  -2 -14   4 61.4098 351.573   1
  -3   0  -7-34.3066 298.140   2
   3   0  -7 247.672 242.120   2
   3   0  -6-73.5269 218.018   2
  -3   0  -6-181.913 283.616   2
  -3   0  -5 131.804 260.440   2
  -3   0  -5-144.410 150.807   1
  -3   0  -4 452.922 209.192   1
  -3   0  -4 614.692 323.368   2
  -3   0  -3-67.6019 146.200   1
  -3   0  -3-121.271 181.601   2
   3   0  -2-47.1877 60.1472   1
   3   0  -2-163.037 165.627   3
  -3   0  -2-70.9256 133.707   1
  -3   0  -1 100.929 114.068   1
   3   0  -1-84.7392 81.1701   1
  -3   0   0-78.0581 101.516   1
   3   0   1-72.2549 97.4486   2
  -3   0   1-21.5879 88.0736   1
   3   0   2 207.879 170.138   2
   3   0   2 84.7798 120.911   1
   3   0   3 92.7142 108.910   1
   3   0   3 133.136 138.947   2
   3   0   4-40.6473 129.146   1
   3   0   5 417.985 305.635   3
   3   0   5 49.1405 153.532   1
   3   0   6 716.445 434.939   3
   3   0   7-327.298 361.218   3
   3   0   8 559.078 488.873   3
   3   0   9-121.369 420.019   3
  -3   1  -8 3682.62 697.375   2
   3  -1  -7 21766.3 1202.30   2
  -3   1  -7 21494.5 1481.43   2
   3   1  -7 23156.2 1392.05   2
   3  -1  -6 16560.6 938.335   2
  -3   1  -6 17410.5 1223.11   2
  -3  -1  -6 16383.0 824.557   1
  -3   1  -5 101320. 2854.34   2
   3  -1  -5 102633. 2283.39   2
  -3  -1  -5 102247. 2149.74   1
  -3   1  -4 36035.3 1454.24   2
  -3  -1  -4 32387.3 1079.87   1
  -3   1  -3 300870. 3987.15   1
  -3  -1  -3 301521. 4011.37   1
  -3  -1  -2 90009.4 1726.63   1
   3   1  -2 92653.5 1313.53   1
  -3   1  -2 94239.4 1759.31   1
   3  -1  -2 92518.8 1832.25   3
   3   1  -1 782792. 7660.90   1
  -3   1  -1 791215. 8039.38   1
  -3  -1  -1 784055. 7985.19   1
   3  -1   0 314310. 3628.62   2
  -3  -1   0 312588. 3750.77   1
  -3  -1   1 796834. 8043.86   1
   3  -1   1 784541. 8497.84   2
   3   1   2 95123.4 1928.46   2
   3  -1   2 94378.7 1753.74   1
  -3  -1   2 96519.2 1350.83   1
   3  -1   3 308195. 4464.94   3
   3   1   3 314865. 4160.52   1
   3   1   3 309173. 4565.77   2
   3  -1   3 309296. 4107.55   1
   3   1   4 33491.6 1093.41   1
   3  -1   4 32457.2 1048.70   1
   3   1   5 108018. 2890.44   3
   3   1   5 104572. 2191.36   1
   3  -1   5 103360. 2108.58   1
  -3   1   5 109525. 2914.00   3
   3  -1   5 102854. 2762.70   3
  -3   1   6 14728.7 1160.48   3
   3   1   6 15874.4 1186.52   3
   3  -1   6 16861.0 1212.71   3
   3  -1   7 24013.3 1558.66   3
   3   1   7 25517.6 1651.21   3
   3   1   8 3235.75 743.501   3
   3  -1   8 2973.56 631.351   3
   3  -1   9 3650.44 792.414   3
   3   1   9 4395.30 874.301   3
  -3   2  -9-469.854 441.150   2
  -3   2  -8 58.2157 375.294   2
   3   2  -8-122.446 301.332   2
  -3   2  -7 171.230 333.343   2
   3  -2  -6 1685.11 315.334   2
  -3  -2  -6 1002.17 266.934   1
  -3   2  -6 869.255 417.959   2
   3  -2  -5 449.454 178.709   2
  -3   2  -5 706.821 341.425   2
   3  -2  -5 652.623 103.919   1
  -3  -2  -5 268.477 187.432   1
  -3   2  -4 8393.12 771.283   2
   3  -2  -4 9784.08 495.547   2
   3  -2  -4 8915.63 414.184   1
  -3  -2  -4 9700.89 621.978   1
   3  -2  -3 13008.9 434.629   2
   3  -2  -3 12431.1 514.573   1
  -3  -2  -3 12276.7 664.591   1
   3   2  -2 18175.0 580.938   1
  -3  -2  -2 17276.5 744.985   1
   3  -2  -2 17806.2 728.140   3
   3  -2  -1 25962.9 711.828   3
  -3  -2  -1 26701.7 867.184   1
   3   2  -1 26123.9 759.465   1
  -3  -2   0 5268.08 355.372   1
  -3  -2   1 27420.3 772.515   1
   3  -2   2 17213.5 722.628   1
  -3   2   2 18182.6 740.595   3
  -3  -2   2 17412.8 564.786   1
   3  -2   2 19311.4 694.592   3
   3   2   3 13323.5 679.135   1
   3  -2   3 12670.3 634.535   1
   3  -2   3 12967.7 686.335   3
  -3  -2   3 12268.3 413.683   1
   3   2   3 12717.3 724.906   2
  -3   2   3 12522.7 749.278   3
   3  -2   4 9039.82 565.688   1
  -3   2   4 8854.53 762.539   3
   3   2   4 9591.68 610.777   1
   3   2   5 435.126 370.306   3
   3  -2   5 676.181 287.331   3
  -3   2   5 750.667 324.064   3
   3  -2   5 332.660 156.704   1
   3   2   6 1157.76 456.504   3
   3  -2   6 1553.97 491.565   3
  -3   2   6 2428.70 615.340   3
   3  -2   7-177.406 424.217   3
   3   2   7-59.6034 433.664   3
  -3   2   7 787.833 527.919   3
   3   2   8 220.659 417.672   3
   3  -2   8-301.147 330.852   3
   3  -2   9-179.073 472.930   3
  -3   3  -9 1873.23 590.214   2
  -3   3  -8 1738.15 556.548   2
  -3   3  -7 16573.0 1376.86   2
  -3   3  -6 5069.64 747.650   2
  -3  -3  -6 5722.73 553.950   1
   3  -3  -5 63122.7 1400.69   1
  -3   3  -5 63925.6 2338.46   2
  -3  -3  -5 64138.2 1832.96   1
   3  -3  -4 35653.6 1047.96   1
  -3  -3  -4 34531.9 1249.01   1
   3  -3  -3 178949. 2818.21   1
  -3  -3  -3 180854. 3121.54   1
   3  -3  -2 76827.4 1648.48   3
   3   3  -2 79703.5 1570.48   1
  -3  -3  -2 74699.1 1782.48   1
  -3  -3  -1 189598. 3012.20   1
   3   3  -1 190221. 2836.09   1
   3  -3  -1 184740. 2452.94   3
  -3  -3   0 31579.7 1002.02   1
  -3   3   1 190519. 2222.44   2
  -3  -3   1 191720. 2856.03   1
   3  -3   1 189465. 2170.35   3
  -3   3   2 80727.8 1678.51   3
  -3  -3   2 78490.1 1554.75   1
   3  -3   2 78633.3 1464.33   3
  -3   3   3 181505. 3258.79   3
   3   3   3 188823. 3208.67   1
  -3  -3   3 184116. 2615.09   1
   3  -3   3 183673. 2993.91   3
   3  -3   3 181993. 3057.34   1
   3  -3   4 36303.5 1206.85   1
  -3  -3   4 33563.9 820.675   1
  -3   3   4 36737.1 1470.82   3
   3   3   5 68884.8 2348.01   3
  -3   3   5 66082.4 2251.31   3
   3  -3   5 64851.7 2088.62   3
   3   3   6 7150.18 832.032   3
  -3   3   6 6669.83 832.378   3
   3  -3   6 5940.24 744.012   3
  -3   3   7 15798.3 1348.02   3
   3   3   7 14351.6 1269.57   3
   3  -3   7 14944.1 1242.96   3
   3  -3   8 1482.27 534.539   3
  -3   3   8 1718.74 545.446   3
   3   3   8 2379.03 643.860   3
   3  -3   9 2422.02 666.515   3
  -3   4  -9 338.499 377.467   2
   3   4  -9 232.869 313.704   2
  -3   4  -8 640.613 355.253   2
  -3   4  -7 401.414 387.645   2
  -3  -4  -6 2459.73 413.166   1
  -3   4  -6 3229.55 680.586   2
  -3  -4  -5 3232.83 466.469   1
  -3   4  -5 2212.09 517.670   2
   3  -4  -5 2680.29 328.731   1
   3  -4  -4 8486.67 580.085   1
  -3  -4  -4 9632.43 716.709   1
   3  -4  -3 5905.65 485.937   1
  -3  -4  -3 5450.92 533.118   1
   3   4  -2 34171.5 1105.75   1
  -3  -4  -2 32580.2 1212.11   1
   3   4  -1 5039.21 428.190   1
  -3  -4  -1 4637.79 451.019   1
  -3  -4   0 76587.6 1810.52   1
  -3  -4   1 4557.17 429.809   1
  -3   4   1 5126.81 300.562   3
  -3   4   2 33343.5 1039.18   3
  -3  -4   2 34113.5 1103.18   1
   3  -4   2 34128.3 848.759   3
  -3   4   3 6615.60 562.116   3
  -3  -4   3 6181.28 446.440   1
   3  -4   3 6498.50 471.509   3
  -3  -4   4 9192.55 512.440   1
  -3   4   4 9780.56 794.274   3
  -3  -4   5 2908.20 260.190   1
   3   4   5 2835.33 535.306   3
   3  -4   5 3547.62 508.529   3
  -3   4   5 3561.21 591.614   3
   3  -4   6 3275.74 542.339   3
  -3   4   6 3448.66 637.202   3
   3   4   6 3645.69 650.034   3
  -3   4   7 435.223 362.591   3
   3   4   7-266.899 413.985   3
  -3   4   8 842.093 419.972   3
   3   4   8 284.385 422.410   3
   3   5  -9 1698.97 585.050   2
  -3   5  -8 1005.83 541.486   2
  -3   5  -7 10941.1 1204.39   2
  -3   5  -6 7417.12 941.203   2
  -3  -5  -6 6777.55 677.386   1
   3  -5  -5 54358.6 1697.24   1
  -3  -5  -5 52910.5 1873.23   1
   3  -5  -4 45753.8 1523.13   1
  -3  -5  -4 47505.7 1697.77   1
  -3  -5  -3 167332. 3380.55   1
   3  -5  -3 169001. 3221.98   1
  -3  -5  -2 82501.0 2194.27   1
  -3  -5  -1 355534. 5247.37   1
  -3  -5   0 38034.1 1367.72   1
  -3   5   1 348060. 4061.87   3
  -3  -5   1 355796. 5049.27   1
  -3   5   2 81511.6 1733.53   3
  -3  -5   2 83862.5 1990.02   1
  -3  -5   3 172216. 3039.33   1
  -3   5   3 171003. 3143.24   3
  -3   5   4 47840.4 1705.35   3
  -3  -5   4 46868.4 1388.01   1
  -3  -5   5 53460.0 1402.44   1
  -3   5   5 56725.0 2105.60   3
   3  -5   5 54083.3 1865.33   3
   3   5   5 55215.8 2181.95   3
  -3   5   6 8196.23 906.964   3
   3   5   6 8252.63 905.361   3
  -3   5   7 12444.1 1224.74   3
   3   5   7 11991.2 1223.79   3
   3   5   8 629.507 378.848   3
  -3   5   8 1961.52 560.417   3
  -3   6  -8 464.754 543.653   2
  -3   6  -7 122.731 460.126   2
  -3  -6  -6 3678.87 541.991   1
   3  -6  -5 3753.60 516.998   1
  -3  -6  -5 4183.83 574.106   1
   3  -6  -4 8511.27 723.861   1
  -3  -6  -4 8351.81 748.111   1
   3  -6  -3 3958.20 482.986   1
  -3  -6  -3 4368.71 537.371   1
   3  -6  -2 12617.9 854.275   1
  -3  -6  -2 12724.3 893.155   1
  -3  -6  -1 42141.1 1574.50   1
  -3  -6   0 17444.4 988.629   1
  -3  -6   1 42635.4 1523.03   1
  -3   6   1 41804.2 940.728   3
  -3   6   2 12591.1 642.525   3
  -3  -6   2 12450.8 794.694   1
  -3   6   3 3381.55 179.418   2
  -3  -6   3 4100.47 464.305   1
  -3   6   3 3778.99 441.198   3
  -3  -6   4 9529.91 682.026   1
  -3   6   4 8965.59 778.569   3
  -3   6   5 3114.66 542.949   3
  -3  -6   5 3216.88 410.587   1
   3   6   6 3465.67 678.897   3
  -3   6   6 4124.30 671.141   3
   3   6   7-410.800 370.512   3
  -3   6   7 929.482 461.761   3
  -3   6   8 1817.80 649.594   3
   3   6   8 382.753 332.137   3
  -3   7  -7 6044.02 987.067   2
  -3  -7  -6 2206.74 423.365   1
   3  -7  -5 16133.1 1071.39   1
  -3  -7  -5 18509.5 1236.99   1
   3  -7  -4 6378.46 679.914   1
  -3  -7  -4 6313.45 700.513   1
   3  -7  -3 34659.5 1567.21   1
  -3  -7  -3 37543.7 1681.14   1
  -3  -7  -2 9672.49 829.624   1
   3  -7  -2 8695.11 781.855   1
  -3  -7  -1 64484.9 2142.20   1
  -3  -7   0 25384.4 1280.41   1
  -3  -7   1 64843.2 2058.97   1
  -3   7   1 65450.1 1264.39   3
  -3   7   2 10215.4 594.040   3
  -3  -7   2 9496.96 752.223   1
  -3  -7   3 35928.9 1469.21   1
  -3   7   3 34015.7 1301.51   3
  -3   7   4 6037.59 656.633   3
  -3  -7   4 5771.20 581.645   1
  -3  -7   5 17208.6 969.554   1
  -3   7   5 16603.9 1171.68   3
  -3   7   6 3393.12 645.706   3
   3   7   6 3210.48 653.248   3
   3   7   7 4043.42 791.747   3
  -3   7   7 4301.79 781.369   3
  -3   7   8-85.6131 324.449   3
  -3   8  -7 687.959 491.610   2
  -3  -8  -6 6089.57 796.978   1
   3  -8  -5 307.667 278.714   1
  -3  -8  -5 434.503 298.695   1
  -3  -8  -4 25502.0 1490.87   1
   3  -8  -4 22865.6 1351.66   1
   3  -8  -3 693.190 334.250   1
  -3  -8  -3 734.838 331.251   1
  -3  -8  -2 50864.7 2010.03   1
   3  -8  -2 51020.3 2042.18   1
  -3  -8  -1 3289.43 532.491   1
   3  -8  -1 3345.93 554.849   1
  -3  -8   0 63274.0 2231.26   1
  -3   8   1 2813.71 250.391   3
  -3  -8   1 3067.08 518.711   1
  -3   8   2 52290.1 1420.36   3
  -3  -8   2 56976.5 2034.15   1
  -3  -8   3 473.484 253.829   1
  -3   8   3 703.827 232.657   3
  -3   8   4 24496.7 1279.05   3
  -3  -8   4 24536.4 1302.95   1
  -3   8   5-24.5098 235.163   3
  -3  -8   5 237.298 264.373   1
   3   8   6 5639.94 843.728   3
  -3   8   6 5426.11 787.503   3
  -3   8   7 137.819 312.990   3
   3   8   7-34.0324 341.525   3
  -3   8   8 1349.99 538.119   3
  -3  -9  -6-41.6038 362.057   1
   3  -9  -5 8994.05 940.128   1
  -3  -9  -5 8327.11 950.449   1
   3  -9  -4 855.596 404.268   1
  -3  -9  -4 116.737 331.294   1
   3  -9  -3 26336.4 1551.76   1
  -3  -9  -3 26605.3 1582.47   1
   3  -9  -2 471.189 287.808   1
  -3  -9  -2 146.147 279.582   1
   3  -9  -1 48847.7 2090.48   1
  -3  -9  -1 45613.2 2026.65   1
   3  -9   0 723.989 416.206   1
  -3  -9   0 51.4017 278.301   1
  -3   9   1 43963.8 1032.87   3
  -3  -9   1 50612.2 2051.68   1
  -3  -9   2 480.898 345.879   1
  -3   9   2 492.397 196.656   3
  -3  -9   3 27934.6 1509.81   1
  -3   9   3 27336.5 1203.88   3
  -3  -9   4 315.083 304.539   1
  -3   9   4 369.075 296.715   3
  -3  -9   5 9633.20 880.000   1
  -3   9   5 9345.89 915.899   3
   3   9   5 9384.66 995.437   3
   3   9   6-258.099 386.128   3
   3  -9   6-13.6685 280.753   1
  -3   9   6 326.150 360.779   3
   3   9   7 1486.56 507.769   3
  -3   9   7 2361.18 598.337   3
  -3 -10  -6 4001.79 737.156   1
   3 -10  -5 553.817 400.341   1
  -3 -10  -5 826.044 312.764   1
   3 -10  -4 11733.9 1125.25   1
  -3 -10  -4 11422.6 1161.82   1
   3 -10  -3 3184.95 634.482   1
  -3 -10  -3 2662.02 612.467   1
  -3 -10  -2 21237.6 1477.70   1
   3 -10  -2 22035.3 1497.06   1
  -3 -10  -1 3510.80 652.613   1
   3 -10  -1 2601.30 560.446   1
   3 -10   0 22317.3 1490.51   1
  -3 -10   0 23565.8 1515.11   1
   3 -10   1 2179.40 503.419   1
  -3 -10   1 3160.86 594.532   1
   3 -10   2 22992.6 1520.45   1
  -3 -10   2 19880.2 1360.35   1
   3 -10   3 2773.33 578.314   1
  -3 -10   3 2424.22 538.688   1
  -3 -10   4 11310.0 1042.18   1
   3 -10   4 11331.6 1092.07   1
  -3 -10   5 460.603 323.907   1
   3 -10   5 410.916 312.201   1
   3  10   5 574.050 409.148   3
   3  10   6 1852.22 541.354   3
   3  10   7 123.627 357.867   3
  -3 -11  -6-59.0912 300.087   1
   3 -11  -5 823.975 470.444   1
  -3 -11  -5 1212.95 473.232   1
   3 -11  -4 707.348 383.285   1
  -3 -11  -4 414.937 349.708   1
  -3 -11  -3 2310.07 582.124   1
   3 -11  -3 2462.51 619.386   1
   3 -11  -2 759.040 348.722   1
  -3 -11  -2 1009.45 444.810   1
   3 -11  -1 3689.41 683.834   1
  -3 -11  -1 2900.11 636.053   1
  -3 -11   0 1291.87 502.941   1
   3 -11   0 622.733 310.770   1
   3 -11   1 3661.76 665.905   1
  -3 -11   1 4113.75 725.905   1
   3 -11   2 343.815 335.021   1
  -3 -11   2 1236.18 413.708   1
   3 -11   3 1174.97 376.521   1
  -3 -11   3 2657.82 559.994   1
   3 -11   4 294.454 367.183   1
  -3 -11   4 221.292 308.302   1
   3  11   5 414.900 386.242   3
  -3 -11   5 482.087 305.368   1
   3 -11   5 953.237 434.201   1
   3  11   6-83.7082 367.385   3
  -3 -12  -6 2968.55 678.094   1
   3 -12  -5 881.167 482.575   1
  -3 -12  -5 1735.01 493.863   1
   3 -12  -4 6837.49 965.402   1
  -3 -12  -4 8034.57 1077.34   1
  -3 -12  -3 2649.93 683.207   1
   3 -12  -3 2496.31 587.081   1
   3 -12  -2 13909.0 1331.48   1
  -3 -12  -2 14992.0 1376.13   1
   3 -12  -1 4158.00 767.718   1
  -3 -12  -1 2570.61 634.121   1
   3 -12   0 23010.1 1695.26   1
  -3 -12   0 19165.8 1541.33   1
   3 -12   1 3375.00 733.092   1
  -3 -12   1 3772.01 754.295   1
   3 -12   2 15333.6 1384.02   1
  -3 -12   2 13989.2 1297.72   1
   3 -12   3 1700.47 565.025   1
  -3 -12   3 1532.66 539.515   1
  -3 -12   4 8332.96 1019.67   1
   3 -12   4 6305.97 938.881   1
   3 -12   5 1174.87 482.211   1
   3 -13  -5 112.062 403.700   1
  -3 -13  -4 506.743 377.700   1
   3 -13  -4 72.0134 392.072   1
   3 -13  -3-690.482 379.743   1
  -3 -13  -3-252.369 356.413   1
   3 -13  -2 318.138 389.907   1
  -3 -13  -2 794.597 426.225   1
   3 -13  -1-62.4160 345.708   1
  -3 -13  -1-11.3150 447.164   1
   3 -13   0-337.526 437.213   1
  -3 -13   0 108.723 382.952   1
   3 -13   1 598.853 475.297   1
  -3 -13   1-353.759 433.123   1
   3 -13   2 174.973 367.628   1
  -3 -13   2 755.179 463.977   1
   3 -13   3-341.526 336.955   1
  -3 -13   3 337.663 387.753   1
   3 -13   4 639.272 462.983   1
  -3 -13   4-647.281 347.552   1
   3 -13   5-296.229 418.807   1
   3 -14  -1 957.766 452.598   1
  -3 -14  -1 1074.01 463.401   1
  -3 -14   0 4663.58 862.946   1
   3 -14   0 4200.50 827.792   1
  -3 -14   1 842.892 423.804   1
   3 -14   1 1116.78 472.844   1
   3 -14   2 3019.72 718.290   1
  -3 -14   2 3969.12 849.524   1
  -3 -14   3 401.225 414.233   1
  -3 -14   4 1036.30 454.150   1
   4   0  -7 7785.18 767.164   2
  -4   0  -6 40893.5 1393.97   1
  -4   0  -5 35671.3 1269.73   1
  -4   0  -5 35696.5 1610.27   2
  -4   0  -4 104127. 2629.62   2
  -4   0  -4 104752. 2199.09   1
   4   0  -3 126706. 1626.43   1
  -4   0  -3 126121. 2365.37   1
  -4   0  -2 275445. 3758.95   1
   4   0  -2 262389. 3170.78   1
   4   0  -1 182442. 2511.18   1
  -4   0  -1 187121. 2782.11   1
  -4   0   0 712120. 7705.76   1
  -4   0   1 183459. 2527.21   1
   4   0   2 270199. 4016.34   2
  -4   0   2 269008. 3218.45   1
   4   0   3 134527. 2441.14   1
   4   0   4 105160. 2209.72   1
   4   0   5 35720.4 1585.12   3
   4   0   6 45700.0 2000.02   3
   4   0   7 7771.63 961.469   3
   4   0   8 6878.14 932.625   3
   4   0   9 1072.90 514.054   3
  -4   1  -8-230.303 343.710   2
  -4   1  -7-80.4596 287.661   2
  -4  -1  -6 402.071 210.979   1
   4  -1  -6 456.736 230.644   2
  -4   1  -6 335.533 302.798   2
  -4  -1  -5 348.787 224.218   1
  -4   1  -5 473.260 355.074   2
  -4   1  -4 332.963 272.582   2
   4  -1  -4 463.701 74.5748   1
  -4   1  -4 606.202 220.643   1
  -4  -1  -4 494.143 224.132   1
   4  -1  -4 366.293 70.6125   1
   4  -1  -3 6558.64 324.221   1
  -4   1  -3 6335.26 495.296   1
   4   1  -3 6059.58 266.357   1
  -4  -1  -3 7141.42 512.589   1
  -4   1  -2 11466.1 624.147   1
   4  -1  -2 11374.3 472.290   1
   4  -1  -2 11975.2 628.631   3
   4   1  -2 11599.0 447.955   1
  -4  -1  -2 12183.0 626.723   1
   4  -1  -1 2411.08 245.514   1
  -4   1  -1 2423.03 276.758   1
  -4  -1  -1 2796.13 292.086   1
   4   1  -1 2834.76 248.198   1
  -4   1   0 81459.8 1601.88   1
  -4  -1   0 83247.2 1578.57   1
   4  -1   1 2459.30 285.783   2
  -4  -1   1 2252.19 235.995   1
   4   1   2 13908.8 722.779   2
   4  -1   2 13186.4 725.397   2
  -4  -1   2 13310.2 484.076   1
   4  -1   3 7072.53 494.695   1
   4   1   3 7031.04 512.252   1
  -4  -1   3 6206.51 277.603   1
   4  -1   4 669.361 207.242   1
   4  -1   5 114.326 330.607   3
   4   1   5 808.186 449.013   3
   4   1   6 945.374 414.541   3
   4  -1   6 219.423 377.973   3
   4  -1   7 216.931 387.573   3
   4   1   7 470.764 500.698   3
   4   1   8-322.603 450.964   3
   4  -1   8 824.774 446.708   3
   4  -1   9-586.873 541.386   3
  -4   2  -9 514.810 446.364   2
  -4   2  -8 6008.36 897.404   2
   4   2  -8 6750.26 852.730   2
  -4   2  -7 7775.36 952.816   2
   4  -2  -6 33321.7 1226.02   2
  -4   2  -6 35212.7 1845.17   2
  -4  -2  -6 37149.6 1397.20   1
   4  -2  -5 33672.3 1063.63   2
   4  -2  -5 29165.1 665.148   1
  -4  -2  -5 31410.5 1242.93   1
  -4   2  -5 32031.6 1598.54   2
   4  -2  -5 28055.2 655.027   1
  -4   2  -4 124307. 3078.01   2
   4  -2  -4 131116. 2057.37   2
   4  -2  -4 126253. 1978.22   1
  -4  -2  -4 130901. 2651.64   1
   4   2  -3 100351. 1598.44   1
  -4  -2  -3 101453. 2162.14   1
  -4  -2  -2 405656. 5361.67   1
   4   2  -2 413254. 4826.77   1
   4  -2  -2 418713. 5192.93   3
   4  -2  -1 290396. 3237.46   2
   4   2  -1 287602. 3754.75   1
  -4  -2  -1 291006. 4003.40   1
  -4   2   0 735960. 7826.70   2
  -4  -2   0 732267. 8117.62   1
   4  -2   0 731131. 7838.56   2
  -4  -2   1 287655. 3725.65   1
   4  -2   2 427144. 5423.74   1
  -4  -2   2 420758. 4901.65   1
   4   2   3 102221. 2190.29   1
   4  -2   3 104248. 2177.37   3
  -4  -2   3 104157. 1605.85   1
   4  -2   3 103086. 2149.51   1
  -4  -2   4 116873. 1482.60   1
  -4   2   5 32797.4 1579.25   3
   4  -2   5 32474.4 1481.49   3
   4   2   5 30348.1 1546.35   3
   4   2   6 35886.7 1838.48   3
   4  -2   6 36165.7 1745.50   3
   4  -2   7 8920.18 974.654   3
   4   2   7 8688.62 1000.93   3
   4   2   8 8314.19 1102.30   3
   4  -2   8 8594.42 1081.36   3
   4  -2   9 1986.37 663.422   3
  -4   3  -9 103.367 413.830   2
  -4   3  -8 1011.40 469.317   2
  -4   3  -7 1099.37 450.197   2
  -4   3  -6 2911.78 595.587   2
  -4  -3  -6 2748.07 450.334   1
  -4   3  -5 10127.0 940.195   2
   4  -3  -5 9754.33 509.385   1
  -4  -3  -5 8984.60 716.394   1
  -4  -3  -4 7665.04 618.279   1
   4  -3  -4 7144.80 473.400   1
   4   3  -3 37246.2 1016.23   1
  -4  -3  -3 37750.5 1328.16   1
   4   3  -2 14430.3 635.348   1
  -4  -3  -2 14099.1 759.153   1
   4  -3  -2 14068.9 666.456   3
   4   3  -1 5386.21 413.469   1
  -4  -3  -1 4611.32 428.431   1
   4  -3  -1 4583.83 305.388   3
  -4  -3   0 22477.1 877.950   1
  -4   3   0 21385.3 738.390   2
  -4  -3   1 4752.36 399.064   1
   4  -3   2 14971.5 762.030   1
  -4  -3   2 14036.7 630.289   1
   4  -3   2 13324.2 562.727   3
  -4   3   3 40428.9 1378.03   3
  -4  -3   3 38405.0 1022.90   1
   4  -3   3 38692.1 1205.02   3
  -4   3   4 7613.58 692.728   3
  -4  -3   4 7383.20 383.326   1
   4  -3   5 9730.34 808.089   3
  -4   3   5 11771.8 969.398   3
   4  -3   6 3167.12 551.836   3
   4   3   6 2848.56 597.300   3
  -4   3   6 2559.51 607.063   3
   4   3   7 2212.93 637.435   3
   4  -3   7 1305.34 508.983   3
   4   3   8 1422.35 550.276   3
   4  -3   8 1146.68 464.107   3
   4  -3   9 1097.63 572.812   3
  -4   4  -8 2191.16 636.469   2
  -4   4  -7 7234.88 995.323   2
  -4  -4  -6 12816.3 905.841   1
  -4   4  -6 13225.4 1188.20   2
  -4   4  -5 28308.9 1634.41   2
   4  -4  -5 28699.6 1068.51   1
  -4  -4  -5 29102.6 1314.02   1
  -4   4  -4 62627.4 2268.56   2
   4  -4  -4 65761.2 1698.36   1
  -4  -4  -4 65607.1 1973.96   1
  -4  -4  -3 73582.7 2011.96   1
  -4  -4  -2 101181. 2340.58   1
   4   4  -2 100616. 2099.44   1
   4  -4  -2 101096. 1968.21   3
   4   4  -1 202390. 3276.23   1
  -4  -4  -1 201577. 3449.63   1
   4  -4  -1 196166. 2611.99   3
  -4  -4   0 33204.9 1181.00   1
  -4   4   1 203108. 2611.34   2
  -4  -4   1 204694. 3324.86   1
  -4  -4   2 103747. 2105.55   1
  -4   4   2 101275. 1990.88   3
   4  -4   2 101577. 1666.55   3
  -4   4   3 74224.0 1924.97   3
  -4  -4   3 76130.7 1697.79   1
   4  -4   3 74775.2 1683.40   3
  -4  -4   4 65602.6 1487.12   1
  -4   4   4 65628.5 2037.35   3
  -4   4   5 28021.9 1477.60   3
  -4  -4   5 28303.4 816.541   1
  -4   4   6 13329.6 1141.74   3
   4  -4   6 12223.6 1005.08   3
   4   4   6 12663.0 1133.05   3
   4  -4   7 7772.50 894.975   3
   4   4   7 6727.92 896.331   3
  -4   4   7 7482.40 970.907   3
   4   4   8 3959.27 771.639   3
   4  -4   8 3071.52 664.019   3
  -4   5  -8 441.408 477.449   2
  -4   5  -7 6222.28 996.851   2
  -4   5  -6 609.901 367.610   2
  -4  -5  -6 1217.18 357.286   1
  -4   5  -5 27301.7 1652.33   2
   4  -5  -5 26587.2 1155.17   1
  -4  -5  -5 26373.0 1354.30   1
   4  -5  -4 6773.40 599.891   1
  -4  -5  -4 6874.10 649.137   1
  -4  -5  -3 65235.3 2022.87   1
  -4  -5  -2 10286.9 756.934   1
  -4  -5  -1 193939. 3582.51   1
  -4  -5   0 2437.41 378.465   1
  -4  -5   1 187882. 3364.43   1
  -4   5   2 8584.35 275.723   2
  -4  -5   2 9593.28 647.468   1
  -4   5   2 9191.07 541.199   3
  -4  -5   3 64785.0 1717.83   1
  -4   5   3 67816.4 1830.20   3
   4  -5   3 68839.2 1547.95   3
  -4  -5   4 6634.64 504.024   1
  -4   5   4 6995.64 688.401   3
   4  -5   5 28207.4 1321.56   3
  -4  -5   5 27784.2 976.513   1
  -4   5   5 28236.3 1488.50   3
   4   5   6 1380.81 448.640   3
   4  -5   6 1237.64 402.277   3
  -4   5   6 1204.41 392.380   3
   4   5   7 5649.09 843.628   3
   4  -5   7 6407.81 848.454   3
  -4   5   7 6504.80 900.054   3
   4   5   8 598.196 513.275   3
  -4   6  -8 1055.55 541.609   2
  -4   6  -7 2745.30 699.205   2
  -4  -6  -6 6994.15 751.626   1
  -4   6  -6 6776.37 920.414   2
   4  -6  -5 7040.62 657.094   1
  -4  -6  -5 8318.67 793.317   1
  -4  -6  -4 31867.8 1524.87   1
   4  -6  -4 28534.1 1323.09   1
   4  -6  -3 26010.7 1238.16   1
  -4  -6  -3 25881.6 1326.03   1
  -4  -6  -2 48719.6 1780.54   1
  -4  -6  -1 34154.5 1440.16   1
  -4  -6   0 45766.6 1635.94   1
  -4  -6   1 30989.2 1308.89   1
  -4  -6   2 45625.4 1582.81   1
  -4   6   2 44331.8 1244.45   3
  -4   6   3 24723.8 1079.76   3
  -4  -6   3 24935.0 1138.04   1
  -4   6   4 28505.2 1334.80   3
  -4  -6   4 28720.6 1187.04   1
  -4  -6   5 9050.17 638.444   1
  -4   6   5 8422.86 836.161   3
  -4   6   6 7939.87 907.796   3
   4   6   6 9311.70 1020.21   3
   4   6   7 2613.73 676.418   3
  -4   6   7 1475.60 536.548   3
   4   6   8 1090.85 494.422   3
  -4   6   8 959.331 486.505   3
  -4   7  -7 3621.40 790.467   2
  -4  -7  -6 3952.11 675.388   1
  -4   7  -6 2743.28 712.741   2
   4  -7  -5 8595.61 783.911   1
  -4  -7  -5 10366.0 943.432   1
   4  -7  -4 10160.4 852.367   1
  -4  -7  -4 10637.3 941.407   1
  -4  -7  -3 18129.6 1185.73   1
   4  -7  -3 16569.0 1075.85   1
  -4  -7  -2 25621.9 1380.29   1
  -4  -7  -1 59254.6 2052.12   1
  -4  -7   0 35183.7 1540.53   1
  -4  -7   1 62481.0 2043.29   1
  -4   7   2 21619.5 858.870   3
  -4  -7   2 23421.9 1211.94   1
  -4  -7   3 20382.2 1108.39   1
  -4   7   3 18106.6 948.510   3
  -4  -7   4 9686.66 750.957   1
  -4   7   4 9400.83 781.459   3
  -4  -7   5 11229.6 797.039   1
  -4   7   5 9732.39 897.607   3
   4   7   6 3277.99 678.770   3
  -4   7   6 2955.70 574.662   3
   4   7   7 4093.58 776.038   3
  -4   7   7 1771.91 516.860   3
  -4   7   8 1065.13 499.649   3
  -4   8  -7 1591.34 638.523   2
  -4   8  -6 3665.41 773.008   2
  -4  -8  -6 3030.87 572.911   1
   4  -8  -5 6108.41 729.348   1
  -4  -8  -5 6271.88 776.556   1
   4  -8  -4 4922.78 677.053   1
  -4  -8  -4 5146.34 701.460   1
   4  -8  -3 18595.3 1233.50   1
  -4  -8  -3 20718.7 1335.65   1
  -4  -8  -2 11750.7 980.381   1
   4  -8  -2 13017.7 1038.40   1
  -4  -8  -1 29097.9 1508.76   1
  -4  -8   0 34443.2 1643.27   1
  -4  -8   1 29381.2 1486.05   1
  -4  -8   2 13860.9 1031.83   1
  -4   8   2 13064.9 666.405   3
  -4  -8   3 21153.5 1234.99   1
  -4   8   3 18259.8 957.482   3
  -4   8   4 5663.27 618.764   3
  -4  -8   4 5217.28 609.762   1
  -4  -8   5 6210.07 657.096   1
  -4   8   5 6119.69 753.239   3
   4   8   6 3437.30 692.347   3
  -4   8   6 2207.83 523.258   3
   4   8   7 1350.88 539.777   3
  -4   8   7 1350.89 491.192   3
  -4   8   8 1556.16 505.282   3
  -4  -9  -6 3806.51 706.167   1
   4  -9  -5 9897.55 974.559   1
  -4  -9  -5 11433.0 1129.91   1
   4  -9  -4 7467.78 846.831   1
  -4  -9  -4 10285.7 1027.33   1
   4  -9  -3 34192.4 1788.02   1
  -4  -9  -3 31850.6 1770.97   1
   4  -9  -2 15785.0 1193.64   1
  -4  -9  -2 18593.1 1317.29   1
   4  -9  -1 51843.3 2191.34   1
  -4  -9  -1 54130.9 2218.24   1
  -4  -9   0 25532.5 1486.54   1
  -4  -9   1 55702.9 2213.08   1
  -4  -9   2 16624.5 1187.75   1
  -4   9   2 15649.5 729.594   3
  -4  -9   3 33746.8 1671.24   1
  -4   9   3 32210.5 1279.21   3
  -4  -9   4 8481.23 827.509   1
  -4   9   4 8901.63 782.220   3
  -4   9   5 10253.8 929.789   3
  -4  -9   5 11743.5 954.295   1
   4   9   6 2422.44 563.395   3
  -4   9   6 3064.49 610.008   3
  -4   9   7 3257.49 734.342   3
   4   9   7 2768.12 703.493   3
  -4 -10  -6 1183.71 447.408   1
  -4 -10  -5 2560.82 610.857   1
   4 -10  -5 3342.57 664.380   1
   4 -10  -4 2418.41 563.911   1
  -4 -10  -4 3381.65 666.946   1
   4 -10  -3 6155.74 844.706   1
  -4 -10  -3 6045.89 822.518   1
   4 -10  -2 6867.88 882.781   1
  -4 -10  -2 9419.75 1003.95   1
  -4 -10  -1 10159.8 1029.90   1
   4 -10  -1 10507.0 1057.39   1
   4 -10   0 11233.1 1105.75   1
  -4 -10   0 11779.5 1080.50   1
  -4 -10   1 10809.5 1032.93   1
  -4 -10   2 10178.1 1000.70   1
  -4 -10   3 4547.03 661.897   1
  -4 -10   4 3570.46 603.909   1
  -4 -10   5 3859.54 619.235   1
   4 -10   6 1214.48 402.008   1
   4  10   6 1749.06 585.511   3
  -4 -11  -6 1426.37 530.129   1
   4 -11  -5 4025.10 738.965   1
  -4 -11  -5 3651.03 703.386   1
   4 -11  -4 3378.94 707.849   1
  -4 -11  -4 4429.92 795.706   1
   4 -11  -3 11298.6 1180.04   1
  -4 -11  -3 12300.1 1239.46   1
   4 -11  -2 10371.6 1102.63   1
  -4 -11  -2 9547.24 1069.03   1
   4 -11  -1 15165.2 1352.91   1
  -4 -11  -1 13971.6 1251.25   1
   4 -11   0 13504.0 1255.75   1
  -4 -11   0 12154.7 1181.60   1
   4 -11   1 12980.7 1222.91   1
  -4 -11   1 15544.5 1321.17   1
   4 -11   2 9748.74 1088.16   1
  -4 -11   2 9914.97 1049.98   1
   4 -11   3 10069.4 1093.99   1
  -4 -11   3 12118.7 1144.80   1
   4 -11   4 4004.57 701.650   1
  -4 -11   4 3659.52 639.699   1
   4 -11   5 3321.50 673.268   1
   4  11   6 1146.06 505.999   3
   4 -12  -5-569.949 448.542   1
  -4 -12  -5-194.509 419.009   1
   4 -12  -4 767.975 399.620   1
  -4 -12  -4 108.668 397.999   1
   4 -12  -3-781.723 546.061   1
  -4 -12  -3-1.38267 355.387   1
   4 -12  -2 533.002 393.713   1
  -4 -12  -2 65.8527 349.944   1
   4 -12  -1 505.698 411.012   1
  -4 -12  -1 782.062 396.282   1
   4 -12   0-120.210 341.176   1
  -4 -12   0 88.4556 395.560   1
   4 -12   1-280.719 311.085   1
  -4 -12   1-349.029 387.887   1
   4 -12   2 283.344 339.716   1
  -4 -12   2 950.867 445.936   1
  -4 -12   3 516.176 389.931   1
   4 -12   3 482.453 391.204   1
  -4 -12   4 36.8410 320.362   1
   4 -12   4 606.496 447.853   1
   4 -12   5 816.334 475.727   1
   4 -13  -4 1575.81 554.146   1
   4 -13  -3 5358.36 916.020   1
  -4 -13  -3 4370.57 844.751   1
   4 -13  -2 2142.32 569.097   1
  -4 -13  -2 2189.83 645.092   1
   4 -13  -1 6374.47 969.955   1
  -4 -13  -1 7120.49 1039.77   1
   4 -13   0 2601.83 652.614   1
  -4 -13   0 2421.84 641.194   1
   4 -13   1 7444.92 1058.71   1
  -4 -13   1 6265.43 917.408   1
   4 -13   2 1864.12 587.788   1
  -4 -13   2 1943.34 572.120   1
   4 -13   3 4054.46 819.281   1
  -4 -13   3 4117.27 750.159   1
   4 -13   4 1046.49 430.593   1
  -4 -13   4 1888.51 561.548   1
   4 -13   5 1447.94 561.464   1
  -4 -14   0 551.495 430.271   1
  -4 -14   1-179.344 435.468   1
  -4 -14   2-500.604 406.729   1
  -4 -14   3-397.574 391.269   1
  -5   0  -6-12.6981 199.794   1
  -5   0  -5 322.045 200.028   1
  -5   0  -4-104.077 200.484   1
   5   0  -3 9.83317 70.6694   1
  -5   0  -3 111.639 182.333   1
   5   0  -2 24.4089 104.752   1
  -5   0  -2 80.6904 164.166   1
  -5   0  -1-30.8989 169.932   1
   5   0  -1 4.61075 105.569   1
  -5   0   0-57.5045 122.107   1
  -5   0   1-153.369 163.411   1
   5   0   2-223.543 164.080   2
  -5   0   2-47.9029 129.332   1
   5   0   5 125.546 302.087   3
   5   0   6 192.421 377.206   3
   5   0   7 237.807 389.059   3
   5   0   8-0.63586 439.306   3
  -5   1  -7 11061.2 1120.43   2
  -5   1  -6 29429.5 1694.44   2
   5  -1  -6 27593.6 1199.51   2
  -5  -1  -6 27750.8 1245.64   1
  -5   1  -5 43948.4 1888.15   2
  -5  -1  -5 46683.0 1576.56   1
  -5   1  -4 138086. 2752.65   1
  -5  -1  -4 133057. 2725.73   1
  -5   1  -4 133033. 3190.65   2
   5  -1  -3 141704. 2144.59   1
   5   1  -3 145051. 2047.10   1
  -5  -1  -3 144865. 2771.55   1
  -5   1  -2 297723. 4286.64   1
  -5  -1  -2 293441. 4243.73   1
   5   1  -2 292566. 3665.64   1
   5  -1  -2 287665. 3757.70   1
  -5   1  -1 236682. 3562.56   1
   5   1  -1 234018. 3260.62   1
  -5  -1  -1 237263. 3522.41   1
   5  -1  -1 240563. 3343.96   1
  -5  -1   0 254829. 3584.01   1
  -5   1   0 255028. 3637.38   1
   5  -1   1 242685. 3595.21   2
  -5  -1   1 237122. 3314.57   1
  -5  -1   2 308825. 3857.62   1
  -5  -1   3 147498. 2093.73   1
   5  -1   5 47720.1 1831.41   3
   5   1   6 29509.2 1643.62   3
   5  -1   6 27006.5 1535.15   3
   5   1   7 9922.56 1063.33   3
   5  -1   7 10859.0 1090.38   3
   5  -1   8 5660.01 832.758   3
   5   1   8 5404.43 903.350   3
   5  -1   9 1845.44 575.330   3
  -5   2  -8-315.582 348.599   2
  -5   2  -7 1354.75 540.054   2
  -5  -2  -6 1874.45 383.175   1
  -5   2  -6 1280.98 474.919   2
  -5   2  -5 2107.32 504.134   2
   5  -2  -5 1743.66 250.794   2
   5  -2  -5 1442.54 158.392   1
  -5  -2  -5 1685.60 368.037   1
   5  -2  -4 1943.43 230.635   1
  -5  -2  -4 2069.12 373.575   1
  -5  -2  -3 147.528 198.261   1
   5   2  -3 138.621 105.846   1
   5  -2  -3 33.7859 96.1553   1
   5  -2  -2 9563.17 529.627   1
   5   2  -2 8399.71 468.404   1
  -5  -2  -2 9274.63 626.056   1
   5  -2  -2 9146.94 575.807   3
   5  -2  -1 25221.8 907.069   1
   5  -2  -1 25232.9 682.850   2
   5   2  -1 25526.4 881.455   1
  -5  -2  -1 25048.6 961.111   1
   5  -2   0 56464.2 1295.13   2
  -5  -2   0 55652.3 1433.20   1
   5  -2   1 24501.9 955.473   2
  -5  -2   1 24183.4 866.464   1
  -5  -2   2 9287.36 497.463   1
  -5  -2   3-129.733 110.698   1
  -5  -2   4 1695.51 163.921   1
   5  -2   5 1059.38 368.803   3
   5   2   6 2262.65 624.847   3
   5  -2   6 1660.80 448.884   3
   5   2   7 702.206 428.752   3
   5  -2   7 349.753 361.973   3
   5  -2   8 513.076 447.706   3
   5   2   8 33.7582 420.815   3
   5  -2   9 254.451 425.319   3
  -5   3  -9 1630.81 614.016   2
  -5   3  -8 3008.94 677.336   2
  -5   3  -7 8571.02 1035.67   2
  -5  -3  -6 14058.0 963.195   1
  -5   3  -6 14906.5 1267.53   2
  -5  -3  -5 32550.7 1400.05   1
   5  -3  -5 32192.3 981.772   1
  -5   3  -5 33550.9 1762.01   2
  -5   3  -4 34870.2 1623.74   2
  -5  -3  -4 34397.1 1379.07   1
   5   3  -3 74644.2 1589.02   1
  -5  -3  -3 75432.9 2011.17   1
   5  -3  -2 52573.5 1392.24   3
   5   3  -2 54284.3 1374.38   1
  -5  -3  -2 54176.1 1623.41   1
  -5   3  -1 205028. 3401.09   2
   5   3  -1 207393. 3239.48   1
   5  -3  -1 211315. 2866.18   3
  -5  -3  -1 204072. 3430.69   1
  -5   3   0 98070.6 1852.29   2
  -5  -3   0 98762.2 2112.92   1
  -5  -3   1 207404. 3249.32   1
  -5  -3   2 54549.4 1388.59   1
  -5  -3   3 79665.5 1627.61   1
   5  -3   3 78080.4 1829.28   3
  -5  -3   4 35122.0 924.390   1
   5  -3   5 33573.8 1481.10   3
  -5  -3   5 28410.4 572.518   1
   5  -3   6 12979.5 1038.55   3
   5   3   6 15439.6 1258.15   3
   5   3   7 8896.32 1049.08   3
   5  -3   7 8594.53 950.729   3
   5  -3   8 3023.03 681.185   3
   5   3   8 2863.42 626.752   3
   5  -3   9 943.149 532.127   3
  -5   4  -8-337.359 458.034   2
  -5   4  -7 1279.06 517.180   2
  -5   4  -6 1844.67 571.008   2
  -5  -4  -6 761.962 329.605   1
  -5  -4  -5 4461.85 572.133   1
  -5   4  -5 5188.54 767.124   2
   5  -4  -5 3722.64 392.696   1
   5  -4  -4 3168.59 396.228   1
  -5  -4  -4 3150.20 470.903   1
  -5   4  -4 3408.58 568.391   2
   5   4  -3 17551.2 808.434   1
  -5  -4  -3 15898.8 954.482   1
   5  -4  -2 1350.38 236.484   3
   5   4  -2 1879.13 271.354   1
  -5  -4  -2 2067.19 371.874   1
  -5   4  -1 69460.5 1840.00   2
  -5  -4  -1 73961.7 1967.22   1
   5  -4  -1 72456.2 1358.75   3
  -5   4   0 657.659 189.849   2
   5  -4   0 834.293 106.347   3
  -5  -4   0 876.601 251.863   1
  -5   4   1 73277.1 1336.62   2
  -5  -4   1 72058.7 1826.21   1
   5  -4   2 1746.21 213.437   3
  -5  -4   2 1765.02 304.700   1
   5  -4   3 16949.7 768.361   3
  -5  -4   3 17330.6 791.823   1
  -5  -4   4 3226.69 327.133   1
   5  -4   5 4081.53 556.981   3
  -5  -4   5 3845.93 307.637   1
   5   4   6 723.035 373.360   3
   5  -4   6 1059.28 414.312   3
   5  -4   7 3042.04 659.385   3
   5   4   7 817.544 531.131   3
   5   4   8 1065.92 526.825   3
   5  -4   8 767.254 449.417   3
   5  -4   9 648.441 436.708   3
  -5   5  -8 937.333 558.850   2
  -5   5  -7 5688.56 933.352   2
  -5   5  -6 5777.19 859.415   2
  -5  -5  -6 5105.07 652.512   1
  -5   5  -5 18577.8 1366.93   2
   5  -5  -5 18751.9 966.033   1
  -5  -5  -5 19501.8 1198.12   1
  -5   5  -4 9800.48 920.312   2
   5  -5  -4 8628.41 673.807   1
  -5  -5  -4 10079.4 825.499   1
  -5   5  -3 47154.4 1874.31   2
  -5  -5  -3 45340.5 1730.80   1
  -5  -5  -2 28941.4 1298.04   1
   5  -5  -2 28198.6 989.172   3
  -5  -5  -1 88123.6 2298.26   1
  -5   5   0 86554.7 1930.79   2
  -5  -5   0 86570.8 2226.36   1
  -5   5   1 88835.7 1643.04   2
  -5  -5   1 90018.3 2219.57   1
  -5  -5   2 27746.1 1143.21   1
   5  -5   2 28775.0 726.970   3
  -5  -5   3 48833.0 1489.93   1
   5  -5   3 47392.8 1270.74   3
  -5   5   4 9362.66 769.858   3
  -5  -5   4 8980.65 603.878   1
  -5  -5   5 18573.5 810.253   1
  -5   5   5 18736.4 1220.85   3
   5  -5   5 20565.5 1124.56   3
   5   5   6 5762.29 817.306   3
   5  -5   6 6707.36 738.015   3
   5   5   7 5181.13 858.304   3
   5  -5   7 6702.12 827.504   3
   5  -5   8 1101.50 486.186   3
   5   5   8 938.426 406.778   3
  -5   6  -8 526.655 435.911   2
  -5   6  -7 3487.61 825.116   2
  -5  -6  -6 3527.95 606.515   1
  -5   6  -6 5368.65 867.340   2
  -5   6  -5 8121.75 996.077   2
   5  -6  -5 7994.52 702.535   1
  -5  -6  -5 7788.43 831.645   1
  -5   6  -4 16105.6 1245.74   2
   5  -6  -4 15725.5 999.453   1
  -5  -6  -4 16961.1 1133.69   1
  -5  -6  -3 29956.9 1474.98   1
  -5  -6  -2 34964.2 1515.70   1
  -5  -6  -1 13634.6 941.861   1
  -5  -6   0 31401.7 1381.30   1
  -5  -6   1 12396.4 858.073   1
  -5   6   2 31322.7 701.247   2
  -5  -6   2 34684.7 1387.23   1
  -5  -6   3 29514.2 1263.26   1
   5  -6   4 14742.5 798.419   3
  -5  -6   4 15815.7 884.431   1
  -5   6   4 16746.0 1034.00   3
   5  -6   5 7249.52 672.755   3
  -5  -6   5 7639.27 597.612   1
  -5   6   5 6612.31 752.988   3
  -5   6   6 4607.19 728.289   3
   5   6   7 1023.01 467.875   3
  -5   7  -7 2310.38 583.924   2
  -5  -7  -6 3952.37 657.600   1
  -5   7  -6 4304.66 803.221   2
  -5   7  -5 11048.6 1180.76   2
   5  -7  -5 10304.9 861.040   1
  -5  -7  -5 10909.8 1004.70   1
   5  -7  -4 13643.4 1001.81   1
  -5  -7  -4 13341.9 1073.03   1
   5  -7  -3 36066.6 1627.44   1
  -5  -7  -3 38674.8 1751.77   1
  -5  -7  -2 29792.9 1506.60   1
  -5  -7  -1 43165.6 1793.40   1
  -5  -7   0 22552.4 1258.16   1
  -5  -7   1 44063.8 1725.25   1
  -5   7   2 25901.5 765.301   2
  -5  -7   2 30434.4 1387.71   1
  -5   7   3 36893.0 1354.71   3
  -5  -7   3 37025.3 1520.39   1
  -5   7   4 14144.6 976.254   3
  -5  -7   4 13117.5 884.840   1
  -5  -7   5 11422.2 812.843   1
  -5   7   5 12491.3 1034.84   3
  -5   7   6 3407.92 631.607   3
   5   7   7 1849.23 574.799   3
  -5   8  -7 376.234 483.838   2
  -5   8  -6 3599.05 795.398   2
  -5  -8  -6 3784.24 696.858   1
   5  -8  -5 5208.32 674.333   1
  -5   8  -5 6054.82 908.810   2
  -5  -8  -5 6159.32 791.466   1
   5  -8  -4 11487.5 997.096   1
  -5  -8  -4 10892.9 1040.70   1
   5  -8  -3 19827.6 1280.36   1
  -5  -8  -3 18349.2 1291.24   1
  -5  -8  -2 26817.0 1519.83   1
  -5  -8  -1 26498.7 1474.76   1
  -5  -8   0 43874.4 1875.26   1
  -5  -8   1 25801.6 1392.08   1
  -5  -8   2 24879.9 1354.42   1
  -5  -8   3 19031.6 1169.16   1
  -5   8   3 17448.6 926.501   3
  -5   8   4 11777.4 882.049   3
  -5  -8   4 10557.4 860.162   1
  -5   8   5 7594.26 824.876   3
  -5  -8   5 6533.88 659.013   1
  -5   8   6 3443.59 623.770   3
   5   8   7 1851.20 607.687   3
  -5   9  -6 933.180 550.540   2
  -5  -9  -6-31.2661 336.032   1
   5  -9  -5 662.633 363.679   1
  -5  -9  -5 147.658 276.926   1
   5  -9  -4 4757.23 719.377   1
  -5  -9  -4 4962.08 757.979   1
   5  -9  -3 2406.14 489.983   1
  -5  -9  -3 1798.62 456.304   1
   5  -9  -2 7402.33 865.024   1
  -5  -9  -2 7973.27 907.468   1
  -5  -9  -1 4012.83 670.443   1
  -5  -9   0 4843.25 696.442   1
  -5  -9   1 2589.57 483.931   1
  -5  -9   2 7353.96 800.799   1
  -5  -9   3 1215.13 369.212   1
  -5  -9   4 3916.15 570.287   1
  -5   9   4 3701.76 532.511   3
  -5  -9   5 1411.68 386.399   1
  -5   9   5 1344.09 432.856   3
   5   9   6-204.691 439.842   3
  -5   9   6 1288.39 473.757   3
   5   9   7-63.4258 388.303   3
  -5  10  -6 1898.79 611.969   2
  -5 -10  -6 1742.46 471.500   1
   5 -10  -5 2674.73 575.713   1
  -5 -10  -5 1884.36 568.137   1
   5 -10  -4 5658.22 827.337   1
  -5 -10  -4 6343.56 899.229   1
   5 -10  -3 2751.62 563.024   1
  -5 -10  -3 3396.81 688.594   1
   5 -10  -2 12371.1 1146.85   1
  -5 -10  -2 12283.0 1148.13   1
   5 -10  -1 7012.22 884.182   1
  -5 -10  -1 7152.72 883.890   1
  -5 -10   0 17734.1 1332.38   1
  -5 -10   1 6936.21 813.235   1
  -5 -10   2 13374.7 1120.19   1
  -5 -10   3 2744.21 560.351   1
  -5 -10   4 4977.87 701.623   1
   5  10   6 1393.89 557.885   3
  -5 -11  -6 856.051 451.816   1
  -5 -11  -5-495.703 400.039   1
   5 -11  -5 668.768 387.620   1
   5 -11  -4 835.191 383.079   1
  -5 -11  -4 1103.30 485.655   1
   5 -11  -3 1120.35 465.921   1
  -5 -11  -3-129.341 383.322   1
   5 -11  -2 1061.85 463.321   1
  -5 -11  -2 285.605 329.802   1
  -5 -11  -1 217.654 357.518   1
   5 -11  -1 266.572 370.061   1
   5 -11   0 550.652 383.905   1
  -5 -11   0 1015.42 459.460   1
  -5 -11   1 341.610 339.021   1
  -5 -11   2 758.368 361.623   1
  -5 -11   3 1064.13 416.749   1
  -5 -11   4 460.669 290.293   1
   5  11   6 94.1690 515.770   3
   5 -12  -5 717.276 379.824   1
  -5 -12  -5 796.998 456.782   1
   5 -12  -4 3209.57 694.835   1
  -5 -12  -4 4226.11 794.830   1
   5 -12  -3 3378.43 687.496   1
  -5 -12  -3 3682.48 790.245   1
  -5 -12  -2 6948.35 994.076   1
   5 -12  -2 6286.40 948.971   1
   5 -12  -1 7491.82 1017.98   1
  -5 -12  -1 5883.19 912.925   1
   5 -12   0 9407.59 1149.92   1
  -5 -12   0 8507.13 1025.62   1
   5 -12   1 5061.65 866.551   1
  -5 -12   1 5420.43 838.053   1
   5 -12   2 6762.17 955.502   1
  -5 -12   2 7161.65 950.216   1
   5 -12   3 2980.28 695.469   1
  -5 -12   3 1880.48 539.056   1
   5 -12   4 3346.32 707.162   1
  -5 -12   4 3304.12 690.091   1
   5 -12   5 1585.65 546.511   1
   5 -13  -4 196.909 346.154   1
   5 -13  -3-56.2143 296.143   1
  -5 -13  -3 134.179 274.511   1
   5 -13  -2-41.8473 366.257   1
  -5 -13  -2-162.965 374.264   1
   5 -13  -1-390.496 500.532   1
  -5 -13  -1-569.765 443.545   1
   5 -13   0 316.726 480.250   1
  -5 -13   0 783.643 511.515   1
   5 -13   1-740.066 544.975   1
  -5 -13   1 68.7019 324.833   1
   5 -13   2 708.244 406.840   1
  -5 -13   2 82.9609 389.349   1
   5 -13   3 240.095 352.632   1
  -5 -13   3 13.6598 322.675   1
  -5 -13   4 64.7496 342.294   1
   5 -13   4-469.080 492.716   1
  -5 -14   2 2707.13 637.039   1
  -6   0  -6 4919.74 563.631   1
  -6   0  -5 34476.0 1417.20   1
   6   0  -4 27484.3 698.455   1
  -6   0  -4 27615.9 1204.47   1
   6   0  -3 50436.5 1152.35   1
  -6   0  -3 51444.2 1599.38   1
  -6   0  -2 52130.5 1549.60   1
   6   0  -2 52264.7 1265.31   1
   6   0  -1 126800. 2261.65   1
  -6   0  -1 125509. 2465.00   1
  -6   0   0 12895.3 697.890   1
  -6   0   1 127028. 2310.28   1
  -6   0   2 54436.5 1322.32   1
   6   0   6 4851.50 657.328   3
   6   0   7 8097.55 937.477   3
   6   0   8 2145.99 662.825   3
  -6  -1  -6 92.0534 209.821   1
  -6   1  -5 1713.11 351.929   1
  -6   1  -5 1899.99 483.384   2
  -6  -1  -5 2157.85 399.325   1
  -6  -1  -4 785.863 336.001   1
  -6   1  -4 234.585 303.288   2
  -6   1  -4 473.928 272.454   1
   6   1  -4 430.169 113.033   1
   6  -1  -4 340.583 113.369   1
   6  -1  -3 1834.83 239.076   1
   6   1  -3 1758.14 216.144   1
  -6   1  -3 1838.03 337.009   1
  -6  -1  -3 1781.68 340.991   1
   6  -1  -2 366.986 138.440   1
  -6   1  -2 304.811 232.113   1
  -6  -1  -2 502.459 217.038   1
   6   1  -2 349.731 137.457   1
  -6   1  -1 12795.0 723.284   1
  -6  -1  -1 12872.0 711.181   1
   6   1  -1 11708.8 609.515   1
   6  -1  -1 12492.4 643.191   1
  -6  -1   0 3033.69 337.778   1
  -6   1   0 2537.47 311.176   1
   6  -1   1 11683.3 681.998   2
  -6  -1   1 11982.8 640.281   1
  -6   1   1 11915.6 644.079   1
  -6  -1   2 285.342 140.451   1
  -6  -1   3 1890.16 234.923   1
   6  -1   5 2286.58 480.620   3
   6  -1   6 207.699 352.076   3
   6   1   6 110.471 356.727   3
   6   1   7 545.208 391.817   3
   6  -1   7 237.924 340.656   3
   6  -1   8 64.2017 391.770   3
   6   1   8 305.884 365.945   3
  -6   2  -7 8298.91 1039.09   2
  -6   2  -6 13502.9 1187.24   2
  -6  -2  -6 11739.7 891.452   1
  -6   2  -5 39087.4 1894.81   2
  -6  -2  -5 40479.6 1588.60   1
   6  -2  -5 39056.0 943.039   1
  -6   2  -4 48495.7 1919.63   2
   6   2  -4 44448.2 1018.05   1
  -6  -2  -4 48397.1 1672.48   1
   6  -2  -4 45834.1 1178.25   1
   6  -2  -3 122777. 2230.31   1
   6   2  -3 122419. 2100.79   1
  -6  -2  -3 123984. 2710.22   1
   6  -2  -2 75183.4 1721.20   1
  -6  -2  -2 78042.5 1994.99   1
   6   2  -2 79061.0 1669.71   1
   6  -2  -1 238148. 3650.17   1
   6   2  -1 240980. 3592.68   1
  -6  -2  -1 235938. 3784.03   1
   6  -2   0 75839.6 1650.73   2
  -6  -2   0 73963.0 1789.14   1
   6  -2   1 241022. 3766.07   2
  -6  -2   1 235239. 3570.57   1
  -6  -2   2 80023.4 1726.88   1
  -6  -2   3 124396. 2150.19   1
  -6  -2   4 48758.9 1074.78   1
   6  -2   5 40204.3 1728.31   3
   6   2   6 12289.1 1110.66   3
   6  -2   6 13260.3 1061.86   3
   6   2   7 7133.05 898.249   3
   6  -2   7 10722.7 1062.09   3
   6  -2   8 2348.74 619.475   3
   6   2   8 2542.95 647.370   3
   6  -2   9 2867.98 700.639   3
  -6   3  -8 254.635 339.921   2
  -6   3  -7 1134.61 457.903   2
  -6   3  -6 981.788 403.553   2
  -6  -3  -6 1104.64 348.113   1
  -6   3  -5 2918.29 567.774   2
   6  -3  -5 2918.60 324.229   1
  -6  -3  -5 2285.55 419.652   1
  -6   3  -4 4112.48 617.824   2
  -6  -3  -4 4068.32 525.893   1
   6   3  -4 3639.50 321.205   1
   6  -3  -4 4074.90 392.044   1
   6  -3  -3 3857.05 384.481   1
  -6  -3  -3 4110.04 487.745   1
   6   3  -3 3393.49 344.391   1
  -6  -3  -2 4413.51 472.117   1
   6   3  -2 4695.38 416.391   1
   6  -3  -2 4640.11 234.121   2
   6  -3  -2 5327.58 446.272   3
  -6   3  -1 52167.9 1541.53   2
   6  -3  -1 51258.5 1148.41   2
   6   3  -1 51749.9 1465.40   1
  -6  -3  -1 52291.4 1607.47   1
  -6  -3   0 1159.35 259.076   1
  -6  -3   1 51314.6 1486.63   1
  -6  -3   2 4736.92 430.884   1
  -6  -3   3 3895.48 369.137   1
  -6  -3   4 3836.05 329.724   1
   6  -3   5 2235.01 424.919   3
  -6  -3   5 2263.43 185.519   1
   6  -3   6 1071.31 376.919   3
   6   3   7 1042.64 518.168   3
   6  -3   7 921.601 394.500   3
   6   3   8 1051.36 526.894   3
   6  -3   8 208.757 337.718   3
   6  -3   9-68.9260 397.294   3
  -6   4  -8 1717.16 561.271   2
  -6   4  -7 8421.84 1044.63   2
  -6   4  -6 13300.0 1249.90   2
  -6  -4  -6 14584.9 1068.80   1
  -6   4  -5 45531.8 2116.53   2
   6  -4  -5 42213.1 1374.02   1
  -6  -4  -5 47180.6 1868.33   1
  -6   4  -4 37457.8 1787.56   2
  -6  -4  -4 40305.8 1642.20   1
   6   4  -3 139064. 2651.86   1
  -6  -4  -3 142378. 3169.37   1
  -6  -4  -2 124231. 2801.77   1
   6  -4  -2 115828. 2259.46   3
  -6   4  -1 190924. 3444.97   2
   6  -4  -1 195226. 2781.35   3
  -6  -4  -1 198641. 3618.92   1
  -6   4   0 260194. 3800.58   2
  -6  -4   0 259848. 4233.02   1
  -6  -4   1 198377. 3466.37   1
  -6  -4   2 115146. 2403.26   1
  -6  -4   3 140296. 2645.82   1
   6  -4   3 143997. 2571.30   3
  -6  -4   4 42341.5 1249.24   1
   6  -4   5 43181.8 1686.50   3
  -6  -4   5 42441.4 1109.16   1
   6  -4   6 13665.4 1074.24   3
   6  -4   7 9674.18 998.883   3
   6   4   7 8112.46 992.013   3
   6   4   8 1981.59 571.385   3
   6  -4   8 1555.34 494.268   3
   6  -4   9 2267.12 624.661   3
  -6   5  -8-664.418 519.702   2
  -6   5  -7 1138.06 568.914   2
  -6   5  -6 3376.37 709.436   2
  -6  -5  -6 2842.18 483.651   1
   6  -5  -5 3819.22 462.376   1
  -6  -5  -5 3690.11 572.392   1
  -6   5  -5 5326.25 765.162   2
  -6   5  -4 8510.45 912.398   2
  -6  -5  -4 7315.52 762.742   1
  -6   5  -3 17151.2 1164.37   2
  -6  -5  -3 15514.1 1024.67   1
  -6  -5  -2 23804.2 1214.08   1
   6  -5  -2 22559.4 897.666   3
   6  -5  -1 20615.7 670.183   3
  -6  -5  -1 19699.9 1097.82   1
  -6   5   0 59671.7 1591.43   2
  -6  -5   0 62302.1 1911.05   1
   6  -5   0 57000.8 911.821   3
  -6   5   1 20909.3 741.211   2
  -6  -5   1 21132.4 1057.76   1
   6  -5   1 18595.2 425.106   3
   6  -5   2 22913.8 673.416   3
  -6  -5   2 24144.6 1102.68   1
  -6  -5   3 17670.5 913.489   1
   6  -5   3 15099.9 705.514   3
  -6  -5   4 7968.96 584.743   1
   6  -5   5 4452.75 538.577   3
  -6  -5   5 4320.87 417.372   1
   6  -5   6 3597.98 551.172   3
   6   5   7 1451.92 498.221   3
   6  -5   7 1828.70 482.237   3
   6   5   8 284.843 373.677   3
   6  -5   8 545.171 398.822   3
  -6   6  -7 4204.61 849.748   2
  -6  -6  -6 2877.67 544.542   1
  -6   6  -6 2787.15 689.926   2
  -6   6  -5 13900.5 1240.99   2
   6  -6  -5 13148.2 910.027   1
  -6  -6  -5 14516.5 1125.51   1
  -6   6  -4 7193.22 850.328   2
   6  -6  -4 7124.75 682.717   1
  -6  -6  -4 7489.13 777.282   1
  -6   6  -3 32592.0 1630.69   2
  -6  -6  -3 34654.1 1609.27   1
  -6   6  -2 20687.6 1204.22   2
  -6  -6  -2 22099.4 1248.36   1
  -6  -6  -1 82265.9 2426.26   1
  -6   6   0 38490.8 1327.82   2
  -6  -6   0 38709.8 1585.40   1
  -6   6   1 79972.5 1710.42   2
  -6  -6   1 82940.2 2312.53   1
  -6  -6   2 21616.4 1110.44   1
  -6  -6   3 35360.6 1412.91   1
   6  -6   3 34593.5 1003.79   3
  -6  -6   4 7587.14 638.031   1
   6  -6   4 6609.05 543.319   3
  -6  -6   5 14531.7 819.764   1
   6  -6   5 14371.9 914.926   3
   6  -6   6 2997.02 509.541   3
   6   6   7 3433.75 756.047   3
   6  -6   7 3070.92 552.172   3
  -6   7  -7 2476.92 711.299   2
  -6  -7  -6 4460.60 693.297   1
  -6   7  -6 4398.02 868.376   2
   6  -7  -5 5409.70 652.005   1
  -6   7  -5 5350.86 809.778   2
  -6  -7  -5 6239.63 809.669   1
  -6   7  -4 14432.5 1236.92   2
   6  -7  -4 13182.6 1003.66   1
  -6  -7  -4 13733.5 1097.34   1
  -6   7  -3 20345.0 1365.03   2
  -6  -7  -3 21575.7 1368.50   1
  -6  -7  -2 33238.8 1623.43   1
  -6  -7  -1 13027.9 982.386   1
  -6  -7   0 43302.7 1771.22   1
  -6   7   1 11700.6 652.556   2
  -6  -7   1 13771.8 980.283   1
  -6   7   2 29948.5 782.462   2
  -6  -7   2 30756.3 1441.20   1
  -6  -7   3 20568.6 1141.77   1
  -6  -7   4 14201.8 928.240   1
  -6  -7   5 5772.11 597.316   1
   6   7   7 1001.09 585.549   3
  -6  -8  -6 1398.96 495.236   1
  -6   8  -6 1680.46 554.352   2
   6  -8  -5 3989.90 588.093   1
  -6   8  -5 3853.67 764.268   2
   6  -8  -4 5121.06 661.741   1
  -6   8  -4 5529.74 808.918   2
  -6  -8  -4 5912.92 792.254   1
  -6  -8  -3 9120.15 945.584   1
  -6  -8  -2 10028.6 969.806   1
  -6  -8  -1 21731.2 1345.54   1
  -6  -8   0 5833.13 721.139   1
  -6   8   1 22159.8 978.738   2
  -6  -8   1 22473.4 1336.13   1
  -6   8   2 10280.9 512.690   2
  -6  -8   2 10614.2 910.500   1
  -6  -8   3 8593.89 808.111   1
  -6  -8   4 6672.84 697.778   1
  -6  -8   5 4758.99 586.398   1
   6   8   7 1067.83 539.759   3
  -6  -9  -6 4461.20 783.669   1
  -6   9  -6 2092.04 753.090   2
   6  -9  -5 2794.31 580.520   1
  -6   9  -5 5002.90 910.023   2
  -6  -9  -5 3398.92 676.005   1
  -6   9  -4 11143.0 1182.08   2
   6  -9  -4 7987.98 910.682   1
  -6  -9  -4 11793.6 1129.03   1
   6  -9  -3 6120.51 783.758   1
  -6  -9  -3 8462.36 969.791   1
  -6  -9  -2 18691.0 1370.88   1
  -6  -9  -1 13616.8 1135.69   1
  -6  -9   0 17546.4 1286.92   1
  -6  -9   1 13505.4 1106.41   1
  -6   9   2 19020.9 780.423   2
  -6  -9   2 22307.8 1383.06   1
  -6  -9   3 8332.50 856.238   1
  -6  -9   4 11807.1 987.530   1
  -6 -10  -6 401.000 359.808   1
   6 -10  -5 713.122 330.672   1
  -6  10  -5 413.267 423.764   2
  -6 -10  -5 1174.36 491.383   1
   6 -10  -4 2362.13 552.045   1
  -6 -10  -4 4263.41 751.761   1
   6 -10  -3 2034.58 560.359   1
  -6 -10  -3 2826.53 628.102   1
   6 -10  -2 5574.77 822.398   1
  -6 -10  -2 5465.71 811.873   1
  -6 -10  -1 3258.15 623.821   1
  -6 -10   0 5183.31 785.125   1
  -6 -10   1 3457.58 620.406   1
  -6 -10   2 4303.10 682.911   1
  -6 -10   3 2363.33 536.019   1
  -6 -10   4 2630.51 509.034   1
  -6 -11  -6 3013.73 700.589   1
   6 -11  -5 2832.35 660.115   1
  -6  11  -5 2156.16 666.263   2
  -6 -11  -5 3758.70 739.505   1
   6 -11  -4 8310.58 1008.31   1
  -6 -11  -4 8101.66 1039.56   1
   6 -11  -3 5435.11 890.201   1
  -6 -11  -3 4566.72 820.071   1
   6 -11  -2 14269.7 1329.81   1
  -6 -11  -2 15134.4 1365.00   1
   6 -11  -1 10207.1 1117.81   1
  -6 -11  -1 9139.96 1031.16   1
  -6 -11   0 19936.2 1527.81   1
  -6 -11   1 12111.1 1187.73   1
  -6 -11   2 13676.6 1243.29   1
  -6 -11   3 4733.88 755.815   1
  -6 -11   4 7506.04 904.862   1
   6 -12  -5-346.712 333.274   1
   6 -12  -4 121.634 297.805   1
  -6 -12  -4-317.827 392.599   1
   6 -12  -3 572.718 364.522   1
  -6 -12  -3 277.548 296.332   1
   6 -12  -2-322.964 415.062   1
  -6 -12  -2 491.988 378.646   1
   6 -12  -1-38.5063 299.635   1
  -6 -12  -1-145.957 319.801   1
   6 -12   0-76.5874 428.724   1
  -6 -12   0 547.975 534.831   1
  -6 -12   1 19.3929 379.122   1
  -6 -12   2 42.5613 321.184   1
  -6 -12   3-829.784 504.542   1
  -6 -12   4 318.617 323.103   1
   6 -12   5 75.9583 414.133   1
   6 -13  -4 902.244 441.740   1
   6 -13  -3 2175.55 592.828   1
   6 -13  -2 1938.91 625.417   1
  -6 -13  -2 1193.46 553.420   1
   6 -13  -1 3699.58 774.704   1
  -6 -13  -1 3246.66 771.786   1
   6 -13   0 3330.03 766.287   1
  -6 -13   0 2053.78 597.136   1
   6 -13   1 3757.04 828.171   1
  -6 -13   1 4206.18 812.426   1
   6 -13   2 3264.63 793.809   1
  -6 -13   2 1963.30 554.001   1
   6 -13   3 470.577 385.627   1
  -6 -13   3 880.948 454.047   1
  -6 -13   4-35.3891 470.766   1
  -7   0  -6-168.348 212.471   1
  -7   0  -5 339.081 313.413   1
  -7   0  -4 166.225 234.607   1
   7   0  -4 70.9057 110.079   1
   7   0  -3 105.552 131.665   1
  -7   0  -3-161.692 197.091   1
   7   0  -2-24.7026 122.793   1
  -7   0  -2 156.047 180.116   1
  -7   0  -1 47.0469 188.332   1
   7   0  -1 68.1440 151.879   1
  -7   0   0-201.386 195.326   1
  -7   0   1-84.5906 208.714   1
  -7   0   2 59.3349 155.430   1
   7   0   6-5.24963 338.781   3
   7   0   7-40.2064 381.826   3
   7   0   8 125.916 398.323   3
  -7  -1  -6 29287.5 1445.37   1
  -7   1  -5 33900.7 1478.12   1
  -7  -1  -5 32617.9 1463.05   1
  -7   1  -4 89951.8 2426.72   1
   7   1  -4 86457.2 1600.48   1
   7  -1  -4 86160.6 1688.73   1
  -7   1  -3 85218.9 2256.37   1
   7   1  -3 76914.7 1640.61   1
   7  -1  -3 74863.5 1683.56   1
  -7  -1  -3 82521.7 2225.47   1
  -7   1  -2 233160. 3980.28   1
   7   1  -2 224421. 3428.40   1
  -7  -1  -2 229804. 3931.91   1
   7  -1  -2 224307. 3484.02   1
  -7   1  -1 209045. 3645.49   1
   7   1  -1 211180. 3373.79   1
  -7  -1  -1 209328. 3605.00   1
   7  -1  -1 209967. 3401.96   1
  -7   1   0 408111. 5602.83   1
  -7  -1   0 405248. 5524.78   1
  -7   1   1 210511. 3442.39   1
  -7  -1   1 211468. 3404.42   1
  -7  -1   2 229418. 3493.10   1
  -7  -1   3 83237.6 1747.33   1
   7  -1   6 29385.7 1637.60   3
   7   1   6 30165.3 1705.95   3
   7  -1   7 8358.04 984.355   3
   7   1   7 9198.58 1035.75   3
   7  -1   8 6373.30 927.018   3
   7   1   8 4316.39 774.233   3
  -7   2  -6 963.605 473.721   2
  -7  -2  -6 104.183 233.019   1
  -7   2  -5 5293.73 779.300   2
  -7  -2  -5 6311.25 670.020   1
   7  -2  -4 1919.67 260.058   1
  -7   2  -4 2109.94 499.287   2
   7   2  -4 1659.39 219.823   1
  -7  -2  -4 2270.11 436.571   1
  -7  -2  -3 29848.1 1312.71   1
   7   2  -3 30800.7 1013.73   1
   7  -2  -3 27522.1 1025.61   1
   7   2  -2 5706.90 456.359   1
  -7  -2  -2 5584.12 551.817   1
   7  -2  -2 4633.51 427.488   1
  -7  -2  -1 29125.6 1195.05   1
   7  -2   0 616.708 200.331   2
  -7  -2   0 441.688 186.599   1
  -7  -2   1 28406.8 1094.76   1
  -7  -2   2 5510.95 465.911   1
  -7  -2   3 30898.6 1029.65   1
  -7  -2   4 1978.13 246.045   1
   7  -2   5 5888.59 688.221   3
   7  -2   6 366.156 340.536   3
   7   2   7 1105.77 418.105   3
   7  -2   7 85.9899 373.896   3
   7   2   8-67.1854 473.343   3
   7  -2   8 232.464 355.305   3
  -7   3  -7 1831.77 598.961   2
  -7   3  -6 14422.0 1316.05   2
  -7  -3  -6 17689.0 1176.02   1
  -7   3  -5 6991.64 854.785   2
   7  -3  -5 6375.97 479.867   1
  -7  -3  -5 6417.74 701.942   1
  -7   3  -4 54703.0 2165.03   2
   7  -3  -4 53590.5 1507.77   1
   7   3  -4 51357.2 1347.77   1
   7  -3  -3 24173.8 521.681   2
   7   3  -3 25487.1 990.407   1
  -7  -3  -3 25954.7 1268.03   1
   7  -3  -2 117895. 1788.35   2
  -7  -3  -2 119854. 2770.18   1
   7  -3  -1 32330.0 966.605   2
  -7  -3  -1 32772.2 1303.31   1
   7  -3   0 123619. 2411.83   2
  -7  -3   0 127845. 2696.21   1
  -7  -3   1 34810.9 1257.89   1
  -7  -3   2 118465. 2421.46   1
  -7  -3   3 28663.1 1054.52   1
  -7  -3   4 58409.2 1435.68   1
   7  -3   5 7242.59 734.037   3
  -7  -3   5 6359.47 367.098   1
   7  -3   6 16056.0 1156.40   3
   7   3   7 2115.62 590.512   3
   7  -3   7 1748.13 494.912   3
   7   3   8 3075.48 722.682   3
   7  -3   8 4507.13 794.157   3
  -7   4  -8 407.078 409.179   2
  -7   4  -7 3000.05 757.381   2
  -7   4  -6 3020.22 694.790   2
  -7  -4  -6 2310.12 508.295   1
  -7   4  -5 10037.8 1031.25   2
   7  -4  -5 8802.40 642.216   1
  -7  -4  -5 9609.14 878.962   1
  -7   4  -4 8364.22 898.147   2
  -7  -4  -4 7787.03 741.930   1
  -7   4  -3 26491.2 1402.44   2
  -7  -4  -3 28914.5 1379.85   1
   7  -4  -2 14909.9 764.793   3
  -7  -4  -2 16802.6 1018.20   1
   7  -4  -1 23431.3 820.608   3
  -7  -4  -1 23068.4 1157.98   1
  -7  -4   0 28473.1 1238.31   1
  -7  -4   1 24676.2 1113.51   1
  -7  -4   2 16589.4 896.514   1
  -7  -4   3 27941.7 1116.32   1
  -7  -4   4 7351.81 546.339   1
   7  -4   5 10441.3 846.433   3
  -7  -4   5 10108.0 554.943   1
   7  -4   6 2451.57 484.466   3
   7   4   7 2713.28 697.670   3
   7  -4   7 2149.46 492.621   3
   7   4   8 915.262 501.612   3
   7  -4   8-240.549 383.415   3
   7  -4   9 88.3473 379.627   3
  -7   5  -7 1827.14 532.027   2
  -7   5  -6 11398.0 1203.82   2
  -7  -5  -6 11085.2 1018.99   1
  -7   5  -5 5980.92 830.898   2
  -7  -5  -5 6640.28 753.566   1
   7  -5  -5 6606.82 600.687   1
  -7   5  -4 54461.0 2273.90   2
  -7  -5  -4 55756.5 2102.35   1
  -7   5  -3 17760.7 1213.55   2
  -7  -5  -3 18057.6 1158.57   1
  -7   5  -2 96401.1 2633.49   2
  -7  -5  -2 97750.6 2674.28   1
   7  -5  -2 92002.1 2002.43   3
  -7  -5  -1 20029.6 1133.44   1
   7  -5  -1 18569.6 682.432   3
  -7   5   0 75989.4 1884.02   2
  -7  -5   0 77688.3 2218.27   1
   7  -5   0 74070.8 1254.50   3
  -7  -5   1 18922.8 1040.40   1
   7  -5   2 98996.2 1712.98   3
  -7  -5   2 94891.2 2382.70   1
  -7  -5   3 18386.6 958.227   1
   7  -5   3 16821.8 766.471   3
  -7  -5   4 52824.0 1618.79   1
  -7  -5   5 6466.07 518.017   1
   7  -5   5 6844.20 661.067   3
   7  -5   6 11982.0 969.579   3
   7   5   7 1153.34 429.430   3
   7  -5   7 1238.28 426.568   3
   7  -5   8 2969.98 633.368   3
  -7   6  -7 2475.88 712.975   2
  -7   6  -6 1438.28 582.957   2
  -7  -6  -6 1326.46 473.545   1
  -7   6  -5 8971.66 1036.50   2
  -7  -6  -5 7926.35 859.143   1
   7  -6  -5 7768.91 712.186   1
  -7  -6  -4 2309.25 479.829   1
  -7   6  -4 3349.01 601.019   2
  -7   6  -3 15416.3 1148.83   2
  -7  -6  -3 15766.7 1117.21   1
  -7   6  -2 8677.82 815.093   2
  -7  -6  -2 9470.38 854.875   1
   7  -6  -2 8092.76 536.712   3
  -7  -6  -1 49072.1 1886.85   1
   7  -6  -1 47444.8 1080.99   3
  -7   6   0 23986.5 1063.34   2
  -7  -6   0 26293.2 1335.58   1
  -7   6   1 46350.5 1285.53   2
  -7  -6   1 50047.9 1811.84   1
  -7  -6   2 9757.08 783.210   1
   7  -6   2 8815.74 353.318   3
  -7  -6   3 16595.3 977.838   1
   7  -6   3 15381.8 666.533   3
  -7  -6   4 2548.59 403.583   1
  -7  -6   5 8295.98 645.105   1
   7  -6   5 7955.90 701.541   3
   7  -6   6 1325.02 344.762   3
   7   6   7 2943.74 691.760   3
  -7   7  -7 407.794 427.590   2
  -7  -7  -6 6828.58 871.333   1
  -7   7  -6 5436.82 929.440   2
  -7  -7  -5 2890.97 547.216   1
   7  -7  -5 1811.46 405.777   1
  -7   7  -5 3790.28 721.958   2
  -7   7  -4 18618.6 1420.24   2
   7  -7  -4 18402.5 1207.23   1
  -7  -7  -4 17927.9 1284.54   1
  -7   7  -3 6613.20 793.633   2
  -7  -7  -3 7503.42 839.881   1
  -7   7  -2 35982.5 1667.38   2
  -7  -7  -2 34528.3 1717.37   1
  -7   7  -1 25663.2 1307.96   2
  -7  -7  -1 28133.2 1492.08   1
  -7  -7   0 48951.4 1959.82   1
  -7   7   1 24282.7 957.857   2
  -7  -7   1 28058.6 1426.87   1
  -7  -7   2 33091.4 1543.21   1
  -7  -7   3 7080.43 695.699   1
  -7  -7   4 17534.3 1077.04   1
  -7  -7   5 3122.22 450.477   1
   7   7   7 567.319 436.788   3
  -7  -8  -6 1772.00 551.077   1
  -7   8  -6 1666.18 624.396   2
  -7  -8  -5 5613.66 814.156   1
   7  -8  -5 4486.13 667.925   1
  -7   8  -5 4567.80 795.190   2
   7  -8  -4 4081.88 634.012   1
  -7   8  -4 3471.55 683.473   2
  -7  -8  -4 4237.91 726.071   1
  -7   8  -3 10385.2 1016.06   2
  -7  -8  -3 11525.4 1065.80   1
  -7   8  -2 8327.31 873.822   2
  -7  -8  -2 7945.62 899.595   1
  -7   8  -1 24762.4 1342.52   2
  -7  -8  -1 26948.2 1546.63   1
  -7  -8   0 5990.33 750.732   1
  -7   8   1 27626.3 1099.23   2
  -7  -8   1 27554.8 1494.19   1
  -7  -8   2 8216.39 816.790   1
  -7  -8   3 10695.5 918.716   1
  -7  -8   4 4697.14 641.869   1
  -7  -9  -6 1676.51 566.906   1
  -7   9  -6 995.889 399.873   2
   7  -9  -5 338.021 315.963   1
  -7   9  -5 6.42629 294.822   2
  -7  -9  -5 752.488 405.170   1
   7  -9  -4 2256.75 503.873   1
  -7   9  -4 1294.88 409.739   2
  -7  -9  -4 1751.92 459.716   1
  -7   9  -3 669.093 428.416   2
  -7  -9  -3 574.676 405.949   1
  -7   9  -2 3413.71 595.272   2
  -7  -9  -2 5224.86 735.124   1
  -7   9  -1 863.739 313.146   2
  -7  -9  -1 1294.79 439.449   1
  -7   9   0 9147.03 779.480   2
  -7  -9   0 11257.4 1052.09   1
  -7  -9   1 1193.94 355.986   1
  -7  -9   2 4898.75 696.644   1
  -7  -9   3 909.727 356.155   1
  -7  -9   4 1808.82 465.947   1
  -7 -10  -6 120.136 343.735   1
   7 -10  -5 3093.68 645.919   1
  -7  10  -5 4572.52 857.582   2
  -7 -10  -5 5355.53 863.879   1
   7 -10  -4 2413.64 577.531   1
  -7  10  -4 1890.70 587.578   2
  -7 -10  -4 2716.74 676.611   1
  -7  10  -3 10117.5 1104.61   2
   7 -10  -3 11403.8 1124.10   1
  -7 -10  -3 13789.0 1296.64   1
  -7  10  -2 3947.68 670.506   2
  -7 -10  -2 3445.86 703.297   1
  -7  10  -1 13455.3 1086.60   2
  -7 -10  -1 15154.2 1280.59   1
  -7  10   0 3743.82 528.121   2
  -7 -10   0 4517.11 756.844   1
  -7 -10   1 16557.2 1339.27   1
  -7 -10   2 2944.61 582.812   1
  -7 -10   3 11376.2 1067.06   1
  -7 -10   4 2501.56 552.883   1
  -7  11  -5-262.984 342.242   2
  -7 -11  -5-1179.86 498.830   1
   7 -11  -4 883.154 407.416   1
  -7  11  -4 1590.77 565.063   2
  -7 -11  -4 368.945 421.445   1
   7 -11  -3 933.784 395.488   1
  -7  11  -3 1009.39 468.522   2
  -7 -11  -3 224.459 360.744   1
   7 -11  -2 3559.99 752.867   1
  -7  11  -2 2669.72 579.889   2
  -7 -11  -2 2465.20 654.620   1
  -7  11  -1 87.2846 232.326   2
  -7 -11  -1-303.488 405.730   1
  -7  11   0 2849.48 508.093   2
  -7 -11   0 3061.00 640.876   1
  -7 -11   1 91.1707 297.056   1
  -7 -11   2 2491.70 571.961   1
  -7 -11   3-128.592 361.785   1
  -7 -11   4 889.970 389.413   1
   7 -12  -4 1007.61 401.125   1
  -7  12  -4 266.327 376.463   2
  -7 -12  -4 1303.99 477.811   1
   7 -12  -3 2908.65 719.975   1
  -7  12  -3 5229.37 880.559   2
  -7 -12  -3 5160.86 859.491   1
   7 -12  -2 1254.56 510.832   1
  -7  12  -2 1711.10 512.423   2
  -7 -12  -2 1515.02 524.314   1
  -7  12  -1 4963.95 747.000   2
  -7 -12  -1 4674.30 812.891   1
  -7 -12   0 3097.13 660.197   1
  -7 -12   1 6443.78 929.741   1
  -7 -12   2 1957.44 626.096   1
  -7 -12   3 3845.38 715.583   1
  -7 -12   4 579.963 369.648   1
   7 -13  -3-192.149 412.506   1
  -7  13  -3 430.677 376.232   2
   7 -13  -2 942.064 458.995   1
  -7  13  -2 659.950 405.850   2
   7 -13  -1-497.563 346.788   1
  -7 -13  -1-192.439 474.470   1
   7 -13   0 1107.89 553.403   1
  -7 -13   0-303.597 319.177   1
   7 -13   1 674.655 433.672   1
  -7 -13   1 193.990 332.106   1
   7 -13   2 0.79857 419.116   1
  -7 -13   2 516.023 380.815   1
  -7 -13   3-390.931 420.392   1
  -7 -13   4 364.709 376.977   1
  -8   0  -6 637.191 302.874   1
  -8   0  -5 60187.6 2123.27   1
  -8   0  -4 2010.23 423.288   1
   8   0  -4 1864.64 244.504   1
  -8   0  -3 184359. 3710.72   1
   8   0  -3 182257. 3003.67   1
   8   0  -2 5516.40 477.372   1
  -8   0  -2 6212.65 641.425   1
  -8   0  -1 306535. 4848.50   1
  -8   0   0 19752.0 1007.81   1
  -8   0   1 300590. 4571.03   1
  -8   0   2 6280.29 533.469   1
  -8   0   3 182522. 3043.05   1
   8   0   6 337.905 319.160   3
   8   0   7 14629.9 1300.82   3
   8   0   8 631.202 481.620   3
  -8  -1  -6-87.1064 258.362   1
  -8   1  -5 499.560 311.832   1
  -8  -1  -5 157.094 265.432   1
  -8   1  -4 324.238 243.195   1
  -8  -1  -4 423.142 307.019   1
   8  -1  -4 405.743 160.389   1
   8   1  -4 584.135 161.573   1
  -8  -1  -3 306.551 204.414   1
   8  -1  -3 310.556 157.403   1
  -8   1  -3 283.942 277.413   1
   8   1  -3 600.905 201.788   1
  -8   1  -2 5678.70 598.944   1
  -8  -1  -2 7280.00 658.610   1
  -8   1  -1 7682.85 648.487   1
  -8  -1  -1 7200.83 629.217   1
  -8   1   0 8107.77 644.513   1
  -8  -1   0 8554.89 646.052   1
  -8  -1   1 7968.47 609.613   1
  -8   1   1 7984.94 625.204   1
  -8  -1   2 6815.30 549.186   1
  -8  -1   3 672.296 218.946   1
   8  -1   6-120.437 327.724   3
   8  -1   7 105.007 407.537   3
   8   1   7 862.778 395.558   3
   8   1   8 1114.70 530.343   3
   8  -1   8-293.339 417.777   3
  -8  -2  -6 1153.27 405.624   1
  -8  -2  -5 47110.1 1902.30   1
   8  -2  -4 1199.57 230.790   1
   8   2  -4 1516.03 228.792   1
   8   2  -3 114488. 2308.91   1
  -8  -2  -3 123979. 2949.41   1
  -8   2  -2 2428.97 421.290   1
  -8  -2  -2 3096.44 457.651   1
  -8  -2  -1 206743. 3781.43   1
   8  -2   0 3231.38 380.981   2
  -8  -2   0 3590.85 457.210   1
  -8  -2   1 208635. 3620.91   1
  -8  -2   2 2440.36 381.096   1
  -8  -2   3 124334. 2452.11   1
  -8  -2   4 1507.54 251.230   1
   8  -2   5 46896.5 1906.86   3
   8  -2   6 1609.15 437.710   3
   8   2   7 10638.3 1121.52   3
   8  -2   7 11190.5 1092.85   3
   8   2   8 1129.27 491.984   3
   8  -2   8 62.3498 353.865   3
  -8   3  -6 1039.96 487.213   2
  -8  -3  -6 2410.29 486.923   1
  -8   3  -5 194.792 302.348   2
  -8  -3  -5 585.609 331.954   1
  -8   3  -4 5107.08 710.465   2
  -8  -3  -4 5035.58 641.955   1
   8  -3  -3 2550.79 203.617   2
  -8   3  -3 3592.99 568.169   2
  -8  -3  -3 3343.59 522.882   1
   8  -3  -2 17436.1 648.225   2
  -8  -3  -2 18161.0 1048.83   1
   8  -3  -1 59.3583 107.369   2
  -8  -3  -1 477.255 265.376   1
   8  -3   0 39023.3 1306.71   2
  -8  -3   0 39655.6 1484.50   1
  -8  -3   1 347.426 231.356   1
  -8  -3   2 18067.5 922.998   1
  -8  -3   3 2479.88 357.661   1
  -8  -3   4 5526.43 471.756   1
   8  -3   5 290.106 259.781   3
  -8  -3   5 210.758 120.223   1
   8  -3   6 1507.99 464.412   3
   8   3   7-180.314 314.849   3
   8  -3   7 346.793 337.878   3
   8   3   8 198.040 346.700   3
   8  -3   8 228.689 285.460   3
  -8   4  -8-190.270 360.133   2
  -8   4  -7 7643.92 1070.13   2
  -8   4  -6 1473.01 472.613   2
  -8  -4  -6 519.301 267.505   1
  -8   4  -5 32207.9 1870.75   2
  -8  -4  -5 32298.5 1640.90   1
  -8   4  -4 5438.01 742.505   2
  -8  -4  -4 4226.56 582.211   1
  -8   4  -3 69101.3 2375.87   2
  -8  -4  -3 68257.4 2275.18   1
  -8   4  -2 10146.1 844.241   2
  -8  -4  -2 10557.1 854.212   1
  -8  -4  -1 169770. 3542.69   1
  -8  -4   0 3202.89 475.057   1
  -8  -4   1 172032. 3400.10   1
  -8  -4   2 9950.90 737.943   1
  -8  -4   3 76832.5 2022.92   1
  -8  -4   4 5710.85 504.075   1
   8  -4   5 30755.5 1448.42   3
  -8  -4   5 29737.1 1041.10   1
   8  -4   6 480.481 252.442   3
   8   4   7 7472.61 991.792   3
   8  -4   7 8603.46 972.067   3
   8  -4   8 275.762 273.063   3
  -8   5  -7 778.350 485.628   2
  -8   5  -6 1634.27 607.151   2
  -8  -5  -6 2250.02 511.167   1
  -8   5  -5 83.9781 324.264   2
   8  -5  -5 216.833 224.987   1
  -8  -5  -5 1.37419 294.020   1
  -8   5  -4 8483.39 926.323   2
  -8  -5  -4 7077.06 786.592   1
  -8  -5  -3 821.728 373.123   1
  -8   5  -3 272.465 348.786   2
  -8   5  -2 13526.6 971.468   2
  -8  -5  -2 13041.4 991.719   1
   8  -5  -1 9.18746 131.531   3
  -8  -5  -1 134.272 223.656   1
  -8  -5   0 7287.14 696.059   1
  -8  -5   1 370.946 232.375   1
  -8  -5   2 14645.8 918.132   1
  -8  -5   3 107.625 210.702   1
   8  -5   3 203.042 159.134   3
  -8  -5   4 8011.81 658.124   1
  -8  -5   5 259.114 157.550   1
   8  -5   5 582.407 287.634   3
   8  -5   6 1606.14 413.814   3
   8   5   7-140.950 354.998   3
   8  -5   7-129.083 328.399   3
  -8   6  -7 3768.39 802.489   2
  -8   6  -6 822.773 423.506   2
  -8  -6  -6 381.128 283.326   1
  -8   6  -5 10375.3 1156.93   2
   8  -6  -5 12158.1 921.434   1
  -8  -6  -5 12324.1 1101.09   1
  -8  -6  -4 1101.50 340.916   1
  -8   6  -4 825.424 365.412   2
  -8   6  -3 31185.6 1672.29   2
  -8  -6  -3 30533.5 1629.75   1
   8  -6  -2 291.156 148.625   3
  -8   6  -2 509.212 285.857   2
  -8  -6  -2 640.992 316.953   1
  -8  -6  -1 44582.5 1839.68   1
   8  -6  -1 39825.8 1032.62   3
  -8  -6   0 926.273 322.773   1
   8  -6   0 405.423 88.6287   3
  -8  -6   1 41848.7 1706.45   1
  -8  -6   2 478.406 249.662   1
   8  -6   2 931.051 144.910   3
  -8  -6   3 33007.9 1459.55   1
   8  -6   3 32543.9 1022.53   3
  -8  -6   4 1057.93 329.401   1
   8  -6   5 12002.7 854.858   3
   8  -6   6 161.863 222.431   3
  -8   7  -6 2201.83 582.795   2
  -8  -7  -6 3341.00 633.279   1
   8  -7  -5 1291.89 395.454   1
  -8  -7  -5 888.865 423.341   1
  -8   7  -5 1116.58 375.592   2
  -8   7  -4 10450.4 1094.25   2
  -8  -7  -4 8814.70 985.509   1
  -8   7  -3 1685.88 505.611   2
  -8  -7  -3 1792.46 454.695   1
  -8   7  -2 17203.6 1167.47   2
  -8  -7  -2 19825.6 1327.30   1
  -8   7  -1 9684.13 812.891   2
  -8  -7  -1 8799.71 867.658   1
  -8  -7   0 19563.0 1258.88   1
  -8  -7   1 8998.42 841.527   1
  -8  -7   2 18539.9 1179.03   1
  -8  -7   3 1171.24 335.994   1
  -8  -7   4 10471.2 845.509   1
  -8  -8  -6 697.674 425.962   1
  -8   8  -6 1348.74 602.241   2
  -8  -8  -5 7550.18 962.917   1
  -8   8  -5 7358.22 1022.54   2
   8  -8  -5 7737.53 836.516   1
  -8   8  -4 1474.38 504.858   2
   8  -8  -4 1073.45 363.511   1
  -8  -8  -4 1015.80 398.750   1
  -8   8  -3 22351.6 1511.95   2
  -8  -8  -3 20282.8 1447.20   1
  -8   8  -2 2430.69 502.744   2
  -8  -8  -2 2642.17 554.917   1
  -8   8  -1 20312.3 1219.24   2
  -8  -8  -1 22850.5 1455.15   1
  -8  -8   0 6360.88 788.215   1
  -8   8   1 22337.0 994.642   2
  -8  -8   1 24223.1 1443.25   1
  -8  -8   2 2691.10 530.206   1
  -8  -8   3 19830.7 1270.11   1
  -8  -8   4 1358.02 389.490   1
  -8  -9  -6 1906.00 628.572   1
  -8   9  -6 2665.04 733.006   2
  -8  -9  -5 1558.37 482.585   1
  -8   9  -5 925.431 400.188   2
   8  -9  -4 6499.00 837.141   1
  -8   9  -4 8501.47 1017.83   2
  -8  -9  -4 6581.72 929.960   1
  -8   9  -3 2501.16 566.062   2
  -8  -9  -3 3332.78 649.078   1
  -8   9  -2 16110.7 1244.36   2
  -8  -9  -2 16042.6 1307.94   1
  -8   9  -1 6228.41 724.220   2
  -8  -9  -1 5185.76 767.813   1
  -8   9   0 26815.8 1324.94   2
  -8  -9   0 30950.4 1749.50   1
  -8  -9   1 6427.47 803.566   1
  -8  -9   2 17320.5 1281.40   1
  -8  -9   3 4292.06 671.480   1
  -8  -9   4 6147.14 750.422   1
  -8 -10  -6 415.587 327.350   1
  -8  10  -5 476.312 375.379   2
  -8 -10  -5 1562.49 609.221   1
   8 -10  -4 5.28441 321.053   1
  -8  10  -4 594.620 442.175   2
  -8 -10  -4 752.871 505.771   1
  -8  10  -3 2661.96 628.242   2
   8 -10  -3 2615.80 622.630   1
  -8 -10  -3 2927.01 667.627   1
  -8  10  -2 469.907 318.082   2
  -8 -10  -2 153.622 374.695   1
  -8  10  -1 6076.31 721.832   2
  -8 -10  -1 5040.73 801.116   1
  -8  10   0 1385.76 369.570   2
  -8 -10   0 1723.00 532.750   1
  -8 -10   1 5356.75 799.128   1
  -8 -10   2 186.135 325.201   1
  -8 -10   3 3472.10 660.303   1
  -8 -10   4 222.163 262.933   1
  -8 -11  -5 931.186 531.292   1
   8 -11  -4 4075.14 772.108   1
  -8  11  -4 3830.83 810.603   2
  -8 -11  -4 5319.09 939.932   1
   8 -11  -3 1797.93 514.412   1
  -8  11  -3 2958.54 672.393   2
  -8 -11  -3 1372.66 538.997   1
  -8  11  -2 7409.92 916.064   2
  -8 -11  -2 6671.49 963.483   1
  -8  11  -1 1693.35 412.306   2
  -8 -11  -1 2382.83 564.395   1
  -8 -11   0 10994.3 1167.22   1
  -8 -11   1 1750.05 513.560   1
  -8 -11   2 8628.96 1027.22   1
  -8 -11   3 2267.07 583.549   1
  -8 -11   4 4267.68 701.914   1
   8 -12  -4 257.353 371.531   1
  -8  12  -4 1139.85 534.250   2
   8 -12  -3 252.177 308.892   1
  -8  12  -3-399.478 406.740   2
  -8 -12  -3-159.936 316.276   1
   8 -12  -2-557.765 342.532   1
  -8  12  -2 195.103 304.507   2
  -8 -12  -2-237.328 446.488   1
  -8  12  -1 10.7148 239.685   2
  -8 -12  -1 67.6913 328.773   1
  -8 -12   0-136.081 376.110   1
  -8 -12   1 537.296 476.603   1
  -8 -12   2-1133.48 527.849   1
  -8 -12   3 377.164 400.947   1
  -8 -12   4 566.214 335.791   1
  -8  13  -3-306.867 412.255   2
   8 -13  -2 5051.61 914.965   1
  -8  13  -2 6181.61 912.821   2
   8 -13  -1 53.5379 326.487   1
   8 -13   0 8263.16 1166.82   1
  -8 -13   0 9310.95 1202.36   1
  -8 -13   1-962.980 476.441   1
  -8 -13   2 5286.74 930.513   1
  -8 -13   3 462.630 373.250   1
  -9   0  -6 335.681 326.730   1
  -9   0  -5 197.035 258.304   1
  -9   0  -4-29.4875 243.422   1
  -9   0  -3 152.818 228.406   1
  -9   0  -2 184.514 243.690   1
  -9   0  -1 164.894 252.930   1
  -9   0   0-60.4855 206.685   1
  -9   0   1-135.971 258.647   1
  -9   0   2 98.7423 203.712   1
  -9   0   3-154.022 174.921   1
   9   0   7 469.727 400.523   3
   9   0   8-481.010 464.451   3
  -9  -1  -6 17469.9 1236.51   1
  -9   1  -5 1708.45 460.148   1
  -9  -1  -5 2164.03 525.823   1
  -9   1  -4 59064.6 2135.25   1
  -9  -1  -4 60714.4 2156.62   1
  -9   1  -3 8945.60 815.539   1
  -9  -1  -3 9173.54 803.600   1
  -9   1  -2 119627. 2942.19   1
  -9  -1  -2 120343. 2934.79   1
  -9   1  -1 13141.9 907.840   1
  -9  -1  -1 15181.6 953.095   1
  -9   1   0 130113. 2901.47   1
  -9  -1   0 129014. 2873.29   1
  -9   1   1 12162.1 823.971   1
  -9  -1   1 15660.5 890.871   1
  -9  -1   2 120506. 2607.44   1
  -9  -1   3 9663.79 649.391   1
  -9  -1   4 55689.3 1513.66   1
   9  -1   6 14666.0 1202.26   3
   9  -1   7 36.6757 377.705   3
   9   1   7 750.800 424.286   3
   9   1   8 3149.11 713.150   3
   9  -1   8 3005.45 653.029   3
  -9  -2  -6 590.011 334.133   1
  -9  -2  -5 2267.64 478.129   1
  -9  -2  -4 1214.11 352.733   1
  -9   2  -3 5892.04 660.422   1
  -9  -2  -3 5073.91 612.779   1
  -9   2  -2 1116.14 336.865   1
  -9  -2  -2 1165.77 374.283   1
  -9   2  -1 20968.1 1157.78   1
  -9  -2  -1 21298.6 1140.89   1
  -9  -2   0 6968.21 643.048   1
  -9  -2   1 22695.6 1104.22   1
  -9  -2   2 1505.57 311.563   1
  -9  -2   3 4955.29 476.855   1
  -9  -2   4 507.641 208.104   1
   9  -2   6 455.699 280.555   3
   9  -2   7 999.118 494.120   3
   9   2   7 266.253 428.714   3
   9   2   8 221.976 383.397   3
   9  -2   8-86.8484 281.844   3
  -9  -3  -6 13752.1 1134.44   1
  -9  -3  -5 1869.99 436.966   1
  -9  -3  -4 51214.8 2052.03   1
   9  -3  -3 3001.91 258.271   2
  -9  -3  -3 3145.88 524.980   1
   9  -3  -2 104132. 1973.26   2
  -9  -3  -2 112627. 2912.74   1
   9  -3  -1 11640.6 671.709   2
  -9  -3  -1 13337.0 931.607   1
  -9  -3   0 158603. 3371.59   1
  -9  -3   1 13682.2 911.968   1
  -9  -3   2 111955. 2591.71   1
  -9  -3   3 3501.08 439.067   1
  -9  -3   4 53303.1 1589.84   1
   9  -3   5 1852.25 422.587   3
   9  -3   6 14156.3 1133.55   3
   9   3   7 384.067 449.069   3
   9  -3   7 446.229 386.128   3
   9  -3   8 1961.03 511.621   3
  -9   4  -6-2.64168 443.884   2
  -9  -4  -6-52.0738 318.595   1
  -9   4  -5 4179.44 734.574   2
  -9  -4  -5 4456.41 648.045   1
  -9   4  -4 1123.04 398.010   2
  -9  -4  -4 1395.60 428.164   1
  -9   4  -3 9919.25 938.458   2
  -9  -4  -3 10767.0 937.954   1
  -9  -4  -2 1476.88 420.575   1
  -9  -4  -1 22344.1 1223.59   1
  -9  -4   0 2567.59 443.023   1
  -9  -4   1 21896.6 1158.69   1
  -9  -4   2 2055.44 366.486   1
  -9  -4   3 10978.2 776.304   1
  -9  -4   4 566.055 228.393   1
   9  -4   5 4863.99 613.965   3
   9  -4   6 122.283 259.670   3
   9  -4   7 1543.13 488.166   3
   9  -4   8-332.784 311.465   3
  -9   5  -7 417.244 413.966   2
  -9   5  -6 5592.51 916.288   2
  -9  -5  -6 4732.70 747.384   1
  -9   5  -5 830.868 384.462   2
  -9  -5  -5 797.083 392.359   1
  -9   5  -4 15495.3 1266.52   2
  -9  -5  -4 13463.0 1128.34   1
  -9   5  -3 2029.44 497.817   2
  -9  -5  -3 1784.88 465.101   1
  -9   5  -2 33207.3 1581.73   2
  -9  -5  -2 34730.9 1648.64   1
  -9  -5  -1 8491.61 800.869   1
   9  -5  -1 7624.27 507.711   3
  -9  -5   0 63612.4 2144.05   1
  -9  -5   1 8416.78 753.618   1
  -9  -5   2 31264.2 1430.30   1
  -9  -5   3 2084.34 413.063   1
  -9  -5   4 14885.8 924.565   1
   9  -5   5 597.412 279.282   3
   9  -5   6 5918.64 713.011   3
   9  -5   7-14.1834 278.281   3
  -9   6  -7 3638.67 797.544   2
  -9   6  -6 1909.11 616.350   2
  -9  -6  -6 1518.12 519.211   1
  -9   6  -5 10120.0 1151.63   2
  -9  -6  -5 11187.3 1108.23   1
  -9   6  -4 8964.61 997.895   2
  -9  -6  -4 9328.97 976.588   1
  -9   6  -3 35961.7 1854.53   2
  -9  -6  -3 40352.2 1902.72   1
  -9   6  -2 14203.8 1079.90   2
  -9  -6  -2 17105.1 1226.70   1
  -9   6  -1 51656.7 1874.73   2
  -9  -6  -1 51032.3 2074.01   1
   9  -6  -1 49116.3 1242.89   3
  -9  -6   0 10849.7 935.258   1
   9  -6   0 9467.49 426.686   3
  -9  -6   1 53803.5 2017.55   1
  -9  -6   2 15819.1 1062.71   1
   9  -6   2 14568.4 584.369   3
   9  -6   3 34001.4 1088.33   3
  -9  -6   3 37218.9 1609.81   1
  -9  -6   4 9095.95 775.895   1
   9  -6   5 10223.6 800.814   3
  -9   7  -6 2927.91 738.209   2
  -9  -7  -6 1389.81 490.602   1
  -9  -7  -5 473.713 420.097   1
  -9   7  -5 373.308 364.470   2
  -9  -7  -4 6260.07 810.548   1
  -9   7  -4 6562.93 905.963   2
  -9  -7  -3 1476.49 479.551   1
  -9   7  -3 1344.36 438.741   2
  -9   7  -2 14201.9 1081.58   2
  -9  -7  -2 16543.4 1252.18   1
  -9   7  -1 346.392 216.688   2
  -9  -7  -1 868.607 431.526   1
  -9  -7   0 20318.4 1333.83   1
  -9  -7   1 524.005 354.246   1
  -9  -7   2 17484.7 1183.88   1
  -9  -7   3 1435.03 437.079   1
  -9  -7   4 5835.68 656.103   1
  -9   8  -6 1502.30 586.891   2
  -9  -8  -6 196.903 346.922   1
  -9  -8  -5 8528.33 1022.17   1
  -9   8  -5 6427.17 970.883   2
  -9  -8  -4 312.933 402.754   1
  -9   8  -4 1186.32 447.838   2
  -9   8  -3 19382.0 1422.87   2
  -9  -8  -3 18635.8 1430.50   1
  -9   8  -2 807.099 320.226   2
  -9  -8  -2 2201.65 561.311   1
  -9   8  -1 19696.6 1233.51   2
  -9  -8  -1 23052.8 1479.71   1
  -9   8   0 2065.73 381.641   2
  -9  -8   0 1763.18 470.902   1
  -9  -8   1 21190.6 1381.64   1
  -9  -8   2 1518.79 473.315   1
  -9  -8   3 20111.8 1304.23   1
  -9  -8   4 682.881 298.566   1
  -9  -9  -6 2500.94 611.042   1
  -9  -9  -5 148.787 364.734   1
  -9   9  -5-71.5625 348.572   2
  -9  -9  -4 4616.05 779.771   1
  -9   9  -4 3899.95 783.452   2
   9  -9  -4 4435.42 724.430   1
  -9   9  -3 435.871 376.872   2
  -9  -9  -3 517.166 397.280   1
  -9   9  -2 5512.15 742.526   2
  -9  -9  -2 5424.85 856.786   1
  -9   9  -1 598.884 290.921   2
  -9  -9  -1 921.352 478.840   1
  -9   9   0 4423.43 573.587   2
  -9  -9   0 4189.13 701.012   1
  -9  -9   1 812.573 423.068   1
  -9  -9   2 6420.66 804.308   1
  -9  -9   3 365.976 343.092   1
  -9  -9   4 5206.62 721.410   1
  -9 -10  -6 2.27335 351.797   1
  -9 -10  -5 5799.86 940.488   1
  -9  10  -5 2033.16 656.689   2
   9 -10  -4-191.024 300.250   1
  -9  10  -4-181.411 397.416   2
  -9 -10  -4 349.450 337.705   1
  -9  10  -3 8099.65 986.696   2
  -9 -10  -3 8080.36 1049.88   1
  -9  10  -2 731.604 360.812   2
  -9 -10  -2 162.833 394.476   1
  -9  10  -1 14813.2 1144.81   2
  -9 -10  -1 16356.5 1410.67   1
  -9  10   0 1484.09 388.417   2
  -9 -10   0 1102.34 374.297   1
  -9 -10   1 16685.5 1377.40   1
  -9 -10   2 522.043 395.425   1
  -9 -10   3 9008.09 986.281   1
  -9 -10   4-245.895 311.271   1
   9 -11  -4 1280.01 474.224   1
  -9  11  -4 321.752 409.797   2
  -9 -11  -4 1596.46 559.106   1
   9 -11  -3-738.175 445.378   1
  -9  11  -3-59.4235 372.606   2
  -9 -11  -3 443.012 370.948   1
  -9  11  -2 1524.27 481.177   2
  -9 -11  -2 258.753 364.561   1
  -9  11  -1 650.007 380.906   2
  -9 -11  -1 217.226 380.398   1
  -9 -11   0 1368.53 479.653   1
  -9 -11   1-108.861 320.193   1
  -9 -11   2 1197.96 482.529   1
  -9 -11   3 351.917 310.632   1
  -9 -11   4 1171.27 442.796   1
   9 -12  -4 539.245 395.267   1
  -9  12  -4 221.230 327.827   2
   9 -12  -3 1535.88 526.876   1
  -9  12  -3 1693.79 557.284   2
  -9  12  -2 826.217 398.542   2
   9 -12  -2-235.515 419.001   1
  -9 -12  -2 1236.75 528.031   1
  -9 -12  -1 4059.51 793.413   1
  -9 -12   0 666.858 453.196   1
  -9 -12   1 4503.07 833.780   1
  -9 -12   2-104.924 371.639   1
  -9 -12   3 2834.70 684.953   1
  -9  13  -3 6.88018 372.535   2
  -9 -13   1 1051.21 486.671   1
  -9 -13   2 1416.44 523.155   1
  -9 -13   3-456.277 410.020   1
 -10   0  -6-292.251 316.583   1
 -10   0  -5 36734.4 1818.14   1
 -10   0  -4 594.425 391.172   1
 -10   0  -3 89385.2 2685.26   1
 -10   0  -2 1893.40 414.043   1
 -10   0  -1 163342. 3528.42   1
 -10   0   0 7835.30 716.793   1
 -10   0   1 159505. 3347.25   1
 -10   0   2 1359.67 314.471   1
 -10   0   3 85077.2 2168.51   1
  10   0   7 9315.25 1103.69   3
  10   0   8-312.322 459.809   3
 -10  -1  -6 270.471 312.619   1
 -10   1  -5 224.265 265.058   1
 -10  -1  -5 635.508 388.344   1
 -10   1  -4 2369.16 506.994   1
 -10  -1  -4 1965.07 480.112   1
 -10  -1  -3 328.715 281.128   1
 -10   1  -3-271.192 324.442   1
 -10  -1  -2 4334.70 577.558   1
 -10   1  -2 4968.27 626.361   1
 -10  -1  -1 504.564 231.310   1
 -10   1  -1 742.845 325.307   1
 -10   1   0 3354.87 482.882   1
 -10  -1   0 4226.54 530.847   1
 -10  -1   1 654.216 276.539   1
 -10   1   1 1162.15 317.080   1
 -10  -1   2 4354.50 499.923   1
 -10  -1   3 51.3333 187.211   1
 -10  -1   4 2362.85 367.689   1
  10  -1   7-475.511 434.577   3
  10   1   7-217.378 438.348   3
  10  -1   8 283.050 428.066   3
  10   1   8-67.6027 383.197   3
 -10  -2  -6 481.895 365.079   1
 -10  -2  -5 30161.8 1662.42   1
 -10  -2  -4 342.981 262.911   1
 -10   2  -3 75245.1 2481.62   1
 -10  -2  -3 73594.8 2446.99   1
 -10   2  -2 585.421 278.179   1
 -10  -2  -2 110.253 294.910   1
 -10   2  -1 123663. 3087.15   1
 -10  -2  -1 123896. 3049.49   1
 -10  -2   0 1199.94 355.070   1
 -10  -2   1 124071. 2915.70   1
 -10  -2   2 839.574 301.353   1
 -10  -2   3 76229.1 2086.32   1
 -10  -2   4 391.974 188.061   1
  10  -2   6-211.310 313.107   3
  10  -2   7 6904.80 918.581   3
  10  -2   8-128.763 342.083   3
 -10  -3  -7 63.2610 305.959   1
 -10  -3  -6 381.735 358.589   1
 -10  -3  -5 124.122 259.128   1
 -10  -3  -4 1433.79 464.887   1
 -10  -3  -3-178.809 257.349   1
  10  -3  -2 2390.92 301.566   2
 -10  -3  -2 2386.77 497.113   1
 -10  -3  -1-0.35829 267.846   1
 -10  -3   0 1890.50 370.292   1
 -10  -3   1-12.9000 255.586   1
 -10  -3   2 2612.57 426.336   1
 -10  -3   3 36.8130 199.349   1
 -10  -3   4 1643.44 348.273   1
  10  -3   6 416.537 333.443   3
  10  -3   7 171.322 348.222   3
  10  -3   8 62.4401 328.380   3
 -10  -4  -7 3895.82 708.255   1
 -10  -4  -6 725.219 442.437   1
 -10  -4  -5 17888.2 1316.76   1
 -10  -4  -4 393.389 349.475   1
 -10  -4  -3 51478.5 2122.91   1
  10  -4  -2 303.957 140.131   2
 -10  -4  -2 43.0407 257.443   1
  10  -4  -1 58080.7 1664.37   2
 -10  -4  -1 67735.5 2285.01   1
 -10  -4   0 933.936 374.543   1
 -10  -4   1 66576.7 2155.82   1
 -10  -4   2 396.388 249.378   1
 -10  -4   3 52619.1 1801.50   1
 -10  -4   4 432.142 224.457   1
  10  -4   5 17307.4 1141.12   3
  10  -4   6 234.259 314.292   3
  10  -4   7 4475.75 702.914   3
 -10  -5  -7 1691.15 561.215   1
 -10   5  -6 2175.49 705.720   2
 -10  -5  -6 2341.02 548.289   1
 -10   5  -5 1360.31 510.125   2
 -10  -5  -5 2617.62 608.915   1
 -10   5  -4 6076.89 817.607   2
 -10  -5  -4 6679.81 825.658   1
 -10   5  -3 4243.17 681.505   2
 -10  -5  -3 4309.63 653.572   1
 -10  -5  -2 14033.0 1105.27   1
 -10  -5  -1 6210.01 721.056   1
 -10  -5   0 22628.4 1312.12   1
 -10  -5   1 4803.01 628.444   1
 -10  -5   2 13025.1 947.042   1
 -10  -5   3 3564.82 511.438   1
 -10  -5   4 6695.04 654.867   1
  10  -5   5 1740.08 396.202   3
  10  -5   6 1456.47 412.611   3
 -10   6  -6 411.929 467.446   2
 -10  -6  -6 9.67599 295.809   1
 -10   6  -5 19043.6 1564.91   2
 -10  -6  -5 21297.3 1545.51   1
 -10   6  -4-217.759 385.074   2
 -10  -6  -4-16.9596 327.632   1
 -10   6  -3 52627.5 2293.83   2
 -10  -6  -3 48471.9 2181.24   1
 -10  -6  -2 1050.66 429.137   1
 -10   6  -2 624.979 356.066   2
 -10  -6  -1 88875.0 2806.37   1
  10  -6  -1 70934.0 1658.50   3
 -10  -6   0 1639.75 457.238   1
  10  -6   0 1261.35 196.158   3
 -10  -6   1 86631.6 2697.83   1
 -10  -6   2-316.723 296.294   1
 -10  -6   3 53379.7 1967.85   1
  10  -6   3 49108.2 1382.39   3
 -10  -6   4-188.044 256.006   1
 -10   7  -6 1402.56 537.262   2
 -10  -7  -6 3123.43 689.735   1
 -10   7  -5 752.198 441.220   2
 -10  -7  -5 378.061 326.214   1
 -10  -7  -4 5297.14 783.383   1
 -10   7  -4 4936.92 839.323   2
 -10  -7  -3 1118.13 431.171   1
 -10   7  -3 1460.62 509.457   2
 -10   7  -2 13129.1 1099.21   2
 -10  -7  -2 13049.8 1160.61   1
 -10  -7  -1 3826.14 642.758   1
 -10   7  -1 3891.59 569.564   2
 -10  -7   0 22171.8 1412.63   1
 -10  -7   1 3252.39 594.534   1
 -10  -7   2 14439.2 1115.44   1
 -10  -7   3 212.128 265.159   1
 -10  -7   4 5060.28 663.687   1
 -10   8  -6 1003.75 533.839   2
 -10  -8  -6 372.044 388.251   1
 -10   8  -5 4181.09 840.453   2
 -10  -8  -5 2964.36 681.301   1
 -10  -8  -4 1187.84 509.126   1
 -10   8  -4 348.365 354.216   2
 -10  -8  -3 6284.44 877.069   1
 -10   8  -3 5140.34 772.605   2
 -10  -8  -2 1422.55 482.982   1
 -10   8  -2 810.291 342.457   2
 -10   8  -1 12603.7 999.683   2
 -10  -8  -1 14961.8 1256.65   1
 -10  -8   0 782.203 339.568   1
 -10  -8   1 12308.4 1096.74   1
 -10  -8   2 998.801 391.277   1
 -10  -8   3 6519.57 772.892   1
 -10  -8   4-179.760 281.711   1
 -10  -9  -6 1700.56 543.283   1
 -10  -9  -5 517.551 380.744   1
 -10   9  -5-215.955 416.021   2
 -10  -9  -4 6431.94 950.781   1
 -10   9  -4 5970.50 896.211   2
 -10  -9  -3 530.666 414.396   1
 -10   9  -3 311.262 296.966   2
 -10   9  -2 10985.8 1054.25   2
 -10  -9  -2 10931.1 1147.26   1
 -10   9  -1 547.122 298.905   2
 -10  -9  -1-67.7062 406.009   1
 -10   9   0 10018.1 844.908   2
 -10  -9   0 11625.4 1135.62   1
 -10  -9   1-355.571 295.504   1
 -10  -9   2 11473.1 1089.14   1
 -10  -9   3 252.314 244.392   1
 -10  -9   4 6059.76 767.779   1
 -10 -10  -5 1477.83 576.387   1
 -10  10  -5 96.4637 391.261   2
 -10 -10  -4 178.876 313.116   1
 -10  10  -4 76.3383 333.750   2
 -10  10  -3 916.726 450.627   2
 -10 -10  -3 1412.43 470.559   1
 -10  10  -2 485.646 366.185   2
 -10 -10  -2 262.497 347.888   1
 -10  10  -1 2297.94 500.487   2
 -10 -10  -1 2872.22 692.165   1
 -10 -10   0 681.027 358.612   1
 -10 -10   1 1832.25 538.734   1
 -10 -10   2 221.500 330.924   1
 -10 -10   3 1417.78 436.397   1
 -10 -10   4-399.709 369.178   1
  10 -11  -4 2006.02 619.026   1
 -10  11  -4 2041.53 622.465   2
 -10  11  -3-69.6093 339.308   2
 -10 -11  -3 21.7532 393.113   1
 -10  11  -2 4179.96 711.123   2
 -10 -11  -2 5561.66 899.089   1
 -10  11  -1-277.834 361.555   2
 -10 -11  -1 195.513 429.101   1
 -10 -11   0 5924.27 974.035   1
 -10 -11   1 1111.32 453.612   1
 -10 -11   2 5341.79 837.901   1
 -10 -11   3 36.4637 320.565   1
  10 -12  -4 173.159 369.898   1
  10 -12  -3 775.715 490.696   1
 -10  12  -3 697.675 390.409   2
 -10  12  -2 528.433 346.836   2
 -10 -12  -1-25.6930 433.605   1
 -10 -12   0-476.063 397.100   1
 -10 -12   1 882.161 421.372   1
 -10 -12   2-396.226 445.214   1
 -10 -12   3 725.457 410.857   1
 -11   0  -6 179.727 283.346   1
 -11   0  -5 95.9896 275.435   1
 -11   0  -4 305.815 321.444   1
 -11   0  -3 137.741 290.002   1
 -11   0  -2-176.697 261.698   1
 -11   0  -1-5.57897 253.039   1
 -11   0   0 133.438 229.750   1
 -11   0   1 120.532 267.444   1
 -11   0   2-350.884 257.384   1
 -11   0   3 44.9130 206.554   1
  11   0   7 119.553 367.181   3
 -11  -1  -7 246.611 313.191   1
 -11  -1  -6 11016.4 1079.36   1
 -11   1  -5 186.185 290.219   1
 -11  -1  -5 103.407 293.630   1
 -11   1  -4 37147.4 1816.31   1
 -11  -1  -4 35879.8 1804.38   1
 -11  -1  -3 352.437 292.094   1
 -11   1  -3 715.782 369.653   1
 -11   1  -2 81832.9 2621.07   1
 -11  -1  -2 83100.2 2592.96   1
 -11  -1  -1-96.2464 354.890   1
 -11   1  -1 816.149 424.640   1
 -11   1   0 127181. 3156.91   1
 -11  -1   0 127169. 3136.46   1
 -11  -1   1 848.813 309.043   1
 -11   1   1 800.186 339.286   1
 -11  -1   2 84969.7 2380.02   1
 -11  -1   3 916.970 292.387   1
 -11  -1   4 34023.5 1339.98   1
  11  -1   7 874.093 471.436   3
  11   1   7 524.674 451.674   3
  11  -1   8 3607.60 724.951   3
 -11  -2  -7-54.4724 375.480   1
 -11  -2  -6-266.693 302.292   1
 -11  -2  -5 1036.34 376.157   1
 -11  -2  -4-42.6399 304.223   1
 -11  -2  -3 3063.04 553.410   1
 -11   2  -3 3372.03 578.838   1
 -11   2  -2 686.465 327.358   1
 -11  -2  -2 69.8549 304.313   1
 -11   2  -1 1314.31 402.692   1
 -11  -2  -1 1976.69 429.268   1
 -11  -2   0 273.879 242.112   1
 -11  -2   1 1937.44 401.889   1
 -11  -2   2-15.2894 238.803   1
 -11  -2   3 3709.70 489.873   1
 -11  -2   4 339.311 219.303   1
  11  -2   6 162.273 357.296   3
  11  -2   7-147.175 454.597   3
  11  -2   8-153.851 372.158   3
 -11  -3  -7 799.629 459.680   1
 -11  -3  -6 12325.0 1196.61   1
 -11  -3  -5 2055.72 539.484   1
 -11  -3  -4 45107.9 2079.19   1
 -11  -3  -3 3353.04 622.657   1
  11  -3  -2 76810.0 1897.45   2
 -11  -3  -2 89736.0 2766.02   1
 -11  -3  -1 7069.36 760.593   1
 -11  -3   0 113962. 3038.31   1
 -11  -3   1 7650.27 746.756   1
 -11  -3   2 91688.9 2553.51   1
 -11  -3   3 3034.29 497.974   1
 -11  -3   4 45928.1 1640.84   1
  11  -3   6 13144.0 1138.53   3
  11  -3   7 445.116 349.950   3
  11  -3   8 2160.20 532.833   3
 -11  -4  -7 964.693 440.029   1
 -11  -4  -6 1601.11 564.682   1
 -11  -4  -5 5382.34 796.517   1
 -11  -4  -4 1851.95 515.401   1
 -11  -4  -3 18909.6 1314.86   1
 -11  -4  -2 5872.54 744.505   1
 -11  -4  -1 35565.4 1699.55   1
 -11  -4   0 7848.39 801.175   1
 -11  -4   1 34301.9 1614.90   1
 -11  -4   2 7209.53 729.250   1
 -11  -4   3 20602.8 1192.32   1
 -11  -4   4 2250.99 411.659   1
  11  -4   5 5985.67 699.125   3
  11  -4   6 482.548 298.155   3
  11  -4   7 2376.84 570.866   3
 -11  -5  -7 543.947 381.565   1
 -11  -5  -6 6152.29 883.421   1
 -11  -5  -5 959.177 415.872   1
 -11  -5  -4 20439.8 1467.92   1
 -11  -5  -3 782.961 305.199   1
 -11  -5  -2 39798.2 1910.34   1
 -11  -5  -1 3243.51 543.853   1
 -11  -5   0 45847.5 1940.72   1
 -11  -5   1 2495.12 481.497   1
 -11  -5   2 37620.9 1684.62   1
 -11  -5   3 1192.64 350.415   1
 -11  -5   4 19933.4 1155.72   1
  11  -5   4 16833.0 1015.22   3
  11  -5   5 920.707 333.200   3
 -11  -6  -7 152.898 376.442   1
 -11  -6  -6-389.759 426.907   1
 -11   6  -5 652.222 401.135   2
 -11  -6  -5 1910.57 536.301   1
 -11   6  -4 309.569 396.232   2
 -11  -6  -4 205.648 284.509   1
 -11  -6  -3 3645.55 670.762   1
 -11  -6  -2 1026.75 417.248   1
 -11  -6  -1 5140.85 739.183   1
 -11  -6   0 1801.89 455.567   1
 -11  -6   1 5774.64 718.559   1
 -11  -6   2 583.057 364.679   1
 -11  -6   3 3068.93 530.680   1
 -11  -6   4 187.127 229.383   1
 -11   7  -6 2570.07 705.455   2
 -11  -7  -6 620.744 409.116   1
 -11   7  -5 1067.39 548.007   2
 -11  -7  -5 825.512 435.986   1
 -11   7  -4 4359.31 794.340   2
 -11  -7  -4 3820.68 740.253   1
 -11   7  -3 3607.53 663.377   2
 -11  -7  -3 3153.56 623.462   1
 -11   7  -2 6260.04 783.809   2
 -11  -7  -2 6071.38 832.125   1
 -11  -7  -1 3778.16 646.282   1
 -11  -7   0 5587.41 785.128   1
 -11  -7   1 4281.67 652.541   1
 -11  -7   2 6145.15 769.805   1
 -11  -7   3 3870.21 594.334   1
 -11  -7   4 4128.54 613.321   1
 -11  -8  -6-572.188 428.536   1
 -11   8  -5 3436.60 751.038   2
 -11  -8  -5 3886.36 756.524   1
 -11   8  -4-1897.01 579.010   2
 -11  -8  -4 180.176 344.430   1
 -11  -8  -3 6815.77 968.655   1
 -11   8  -3 5180.84 770.649   2
 -11  -8  -2 392.243 442.083   1
 -11   8  -2 8.62940 285.220   2
 -11  -8  -1 17025.1 1382.46   1
 -11  -8   0 173.637 329.834   1
 -11  -8   1 15514.0 1275.60   1
 -11  -8   2 429.129 331.464   1
 -11  -8   3 8710.75 916.520   1
 -11  -8   4-197.094 229.139   1
 -11   9  -5 1155.63 492.345   2
 -11  -9  -5-97.5728 458.464   1
 -11  -9  -4 2491.60 678.151   1
 -11   9  -4 1996.01 573.861   2
 -11  -9  -3 1324.51 521.193   1
 -11   9  -3 1017.35 451.532   2
 -11  -9  -2 7022.53 967.732   1
 -11   9  -2 4690.29 732.895   2
 -11   9  -1-317.701 326.877   2
 -11  -9  -1 299.726 396.588   1
 -11  -9   0 12924.3 1244.99   1
 -11  -9   1 61.4271 471.192   1
 -11  -9   2 7228.44 901.066   1
 -11  -9   3 202.106 305.520   1
 -11  -9   4 2519.70 527.668   1
 -11 -10  -4-559.425 396.932   1
 -11  10  -4 453.227 287.767   2
 -11 -10  -3 4688.64 889.363   1
 -11  10  -3 5162.31 820.107   2
 -11  10  -2 603.457 368.313   2
 -11 -10  -2 326.646 454.424   1
 -11  10  -1 8360.33 892.400   2
 -11 -10  -1 8742.38 1110.29   1
 -11 -10   0 26.2429 329.054   1
 -11 -10   1 6159.25 901.802   1
 -11 -10   2-386.603 359.807   1
 -11 -10   3 5970.63 839.811   1
  11 -11  -4 233.569 417.939   1
 -11  11  -4 232.420 413.053   2
 -11  11  -3-283.318 402.791   2
 -11  11  -2 20.6356 297.090   2
 -11 -11  -2-278.252 489.095   1
 -11 -11  -1-94.5894 436.227   1
 -11 -11   0 8.37361 347.892   1
 -11 -11   1 865.085 432.866   1
 -11 -11   2 1137.28 492.328   1
 -11 -11   3-287.798 444.675   1
 -11  12  -3 1279.23 489.369   2
 -11 -12   0 129.565 375.306   1
 -11 -12   1 2336.43 670.264   1
 -11 -12   2-745.694 451.278   1
 -11 -12   3 2073.08 560.147   1
 -12   0  -7 4077.56 713.601   1
 -12   0  -6 2544.18 645.455   1
 -12   0  -5 14943.3 1260.87   1
 -12   0  -4 5885.32 801.872   1
 -12   0  -3 47696.3 2083.82   1
 -12   0  -2 10408.8 942.492   1
 -12   0  -1 59406.7 2203.49   1
 -12   0   0 9038.33 848.830   1
 -12   0   1 60721.7 2147.31   1
 -12   0   2 10513.8 858.260   1
 -12   0   3 43984.8 1712.46   1
  12   0   7 3141.63 714.623   3
 -12  -1  -7-275.416 415.437   1
 -12  -1  -6 86.1613 309.802   1
 -12  -1  -5 728.101 427.765   1
 -12   1  -5-61.4536 366.571   1
 -12   1  -4 571.308 323.210   1
 -12  -1  -4 697.823 418.015   1
 -12   1  -3-409.276 415.586   1
 -12  -1  -3-243.596 301.032   1
 -12  -1  -2 4272.49 655.509   1
 -12   1  -2 4488.16 655.369   1
 -12   1  -1 124.941 238.035   1
 -12  -1  -1 215.632 268.588   1
 -12   1   0 9288.42 885.072   1
 -12  -1   0 9178.19 866.894   1
 -12   1   1 193.791 246.431   1
 -12  -1   1-308.717 298.986   1
 -12  -1   2 3503.66 548.420   1
 -12  -1   3 239.012 268.924   1
 -12  -1   4 956.711 327.289   1
  12  -1   7 442.322 460.742   3
 -12  -2  -7 1296.31 472.166   1
 -12  -2  -6 463.094 356.378   1
 -12  -2  -5 7965.45 958.651   1
 -12  -2  -4 3385.29 636.271   1
 -12   2  -3 24773.0 1500.27   1
 -12  -2  -3 22775.9 1449.96   1
 -12   2  -2 5595.64 747.824   1
 -12  -2  -2 6078.84 782.487   1
 -12   2  -1 41364.9 1859.45   1
 -12  -2  -1 39794.5 1819.18   1
 -12  -2   0 7480.44 790.131   1
 -12  -2   1 41899.3 1791.24   1
 -12  -2   2 6183.54 704.882   1
 -12  -2   3 25296.9 1313.51   1
 -12  -2   4 2601.06 457.308   1
  12  -2   7 1526.32 494.069   3
  12  -2   8-494.090 397.030   3
 -12  -3  -7 677.747 405.191   1
 -12  -3  -6 1054.81 505.469   1
 -12  -3  -5 3004.20 620.495   1
 -12  -3  -4 701.073 355.224   1
 -12  -3  -3 6449.34 813.207   1
 -12  -3  -2 1965.44 520.781   1
 -12  -3  -1 13269.9 1076.63   1
 -12  -3   0 2457.80 476.807   1
 -12  -3   1 13138.2 1028.28   1
 -12  -3   2 1535.22 386.684   1
 -12  -3   3 6840.96 693.128   1
 -12  -3   4 1407.16 383.676   1
  12  -3   6 994.674 423.973   3
  12  -3   7 1288.44 515.103   3
 -12  -4  -7 525.934 344.058   1
 -12  -4  -6 727.836 421.363   1
 -12  -4  -5 4725.03 764.633   1
 -12  -4  -4 2661.03 585.599   1
 -12  -4  -3 8017.75 924.382   1
 -12  -4  -2 5739.17 787.585   1
 -12  -4  -1 12619.6 1078.23   1
 -12  -4   0 8665.61 859.098   1
 -12  -4   1 12591.5 1022.32   1
 -12  -4   2 5558.01 688.680   1
 -12  -4   3 7311.99 763.518   1
 -12  -4   4 1739.95 379.326   1
  12  -4   5 3424.65 565.401   3
  12  -4   6 1452.65 430.100   3
 -12  -5  -7-545.852 420.399   1
 -12  -5  -6 1786.03 545.275   1
 -12  -5  -5 502.104 372.743   1
 -12  -5  -4 4669.83 778.113   1
 -12  -5  -3 392.398 328.952   1
 -12  -5  -2 10349.7 1032.40   1
 -12  -5  -1 627.900 344.316   1
 -12  -5   0 9339.73 936.992   1
 -12  -5   1 1219.26 419.944   1
 -12  -5   2 8158.81 851.460   1
 -12  -5   3 532.682 292.119   1
 -12  -5   4 4835.77 602.159   1
 -12  -6  -7 2191.54 624.873   1
 -12  -6  -6 531.086 308.403   1
 -12  -6  -5 2581.37 580.011   1
 -12  -6  -4 278.893 397.744   1
 -12  -6  -3 8960.15 1021.57   1
 -12  -6  -2 497.107 370.857   1
 -12  -6  -1 16895.1 1288.45   1
 -12  -6   0 346.488 418.229   1
 -12  -6   1 18355.6 1280.34   1
 -12  -6   2 364.118 342.702   1
 -12  -6   3 13380.9 1081.04   1
 -12  -6   4-312.056 307.066   1
 -12  -7  -6 1130.64 458.760   1
 -12  -7  -5 217.499 361.926   1
 -12  -7  -4 6300.69 918.113   1
 -12  -7  -3 635.516 404.900   1
 -12  -7  -2 13898.8 1265.17   1
 -12  -7  -1 591.884 435.522   1
 -12  -7   0 16232.8 1300.50   1
 -12  -7   1-603.510 388.405   1
 -12  -7   2 13714.2 1161.08   1
 -12  -7   3 503.174 350.918   1
 -12  -7   4 6505.20 777.715   1
 -12   8  -5 1170.09 499.704   2
 -12  -8  -5 2724.79 715.621   1
 -12   8  -4 20.9021 313.227   2
 -12  -8  -4 793.648 481.928   1
 -12   8  -3 3836.36 723.098   2
 -12  -8  -3 4837.90 857.174   1
 -12  -8  -2 1390.62 570.128   1
 -12  -8  -1 4642.89 746.151   1
 -12  -8   0 521.524 406.826   1
 -12  -8   1 5132.75 779.025   1
 -12  -8   2 1195.50 456.821   1
 -12  -8   3 4503.28 698.778   1
 -12  -8   4 1074.13 360.944   1
 -12   9  -4 2799.19 717.252   2
 -12  -9  -4 2932.94 768.082   1
 -12  -9  -3 341.723 384.147   1
 -12   9  -3 684.773 399.400   2
 -12  -9  -2 7101.47 1028.28   1
 -12  -9  -1 1104.70 454.121   1
 -12  -9   0 8451.33 1034.15   1
 -12  -9   1 1134.18 523.410   1
 -12  -9   2 5098.63 822.481   1
 -12  -9   3 566.079 339.731   1
 -12  10  -4 19.1986 345.940   2
 -12 -10  -3 571.358 498.626   1
 -12  10  -3-292.689 424.404   2
 -12 -10  -2 627.761 381.827   1
 -12  10  -2-164.994 337.531   2
 -12 -10  -1 378.325 371.005   1
 -12 -10   0-40.6438 392.019   1
 -12 -10   1 1483.69 527.182   1
 -12 -10   2 409.437 406.252   1
 -12 -10   3 1020.64 403.161   1
  12 -11  -4 2158.82 633.360   1
 -12  11  -3-349.363 446.028   2
 -12 -11  -1 1073.85 578.443   1
 -12 -11   0 4707.53 850.955   1
 -12 -11   1 236.521 407.742   1
 -12 -11   2 3791.26 745.790   1
 -12 -11   3-230.483 379.030   1
 -12 -12   3 844.547 490.354   1
 -13   0  -6 493.788 396.607   1
 -13   0  -5-209.566 298.074   1
 -13   0  -4 328.766 361.991   1
 -13   0  -3-136.510 324.828   1
 -13   0  -2-299.061 304.617   1
 -13   0  -1 149.844 248.958   1
 -13   0   0 445.592 243.795   1
 -13   0   1 54.4124 289.821   1
 -13   0   2 403.079 338.821   1
 -13  -1  -7 761.799 452.695   1
 -13  -1  -6 7099.61 967.319   1
 -13  -1  -5 1022.67 413.254   1
 -13   1  -5 1659.73 528.387   1
 -13   1  -4 18182.4 1423.60   1
 -13  -1  -4 19154.5 1433.65   1
 -13   1  -3 4582.56 722.459   1
 -13  -1  -3 4688.41 748.819   1
 -13   1  -2 38286.0 1905.54   1
 -13  -1  -2 38267.3 1926.96   1
 -13   1  -1 9300.31 949.512   1
 -13  -1  -1 9246.21 920.556   1
 -13   1   0 44986.1 2004.75   1
 -13  -1   0 45980.2 1991.84   1
 -13   1   1 8213.64 830.013   1
 -13  -1   1 9540.99 888.637   1
 -13  -1   2 38984.6 1771.36   1
 -13  -1   3 4722.35 634.346   1
  13  -1   7-221.990 357.533   3
 -13  -2  -7-480.336 413.711   1
 -13  -2  -6 174.075 322.375   1
 -13  -2  -5 282.906 267.338   1
 -13  -2  -4 559.191 480.877   1
 -13  -2  -3 571.176 368.417   1
 -13  -2  -2 527.689 361.901   1
 -13   2  -2 224.953 309.321   1
 -13  -2  -1 979.424 445.678   1
 -13  -2   0 1656.29 444.942   1
 -13  -2   1 928.637 346.262   1
 -13  -2   2 449.784 288.299   1
 -13  -2   3 112.890 248.095   1
 -13  -2   4 340.256 229.918   1
  13  -2   7-48.6091 310.594   3
 -13  -3  -7 1018.01 459.131   1
 -13  -3  -6 5926.15 884.749   1
 -13  -3  -5 257.430 401.761   1
 -13  -3  -4 19989.8 1492.97   1
 -13  -3  -3 682.653 464.201   1
 -13  -3  -2 47356.6 2162.91   1
 -13  -3  -1 281.198 386.902   1
 -13  -3   0 67790.4 2469.51   1
 -13  -3   1 396.439 337.897   1
 -13  -3   2 47439.7 1996.96   1
 -13  -3   3 675.312 329.648   1
 -13  -3   4 23265.0 1295.01   1
  13  -3   6 8130.22 937.143   3
  13  -3   7-151.935 300.877   3
 -13  -4  -7-331.368 359.799   1
 -13  -4  -6-51.2139 360.188   1
 -13  -4  -5 168.096 318.390   1
 -13  -4  -4 133.904 344.823   1
 -13  -4  -3 1502.59 494.776   1
 -13  -4  -2 531.597 424.156   1
 -13  -4  -1 2726.29 546.962   1
 -13  -4   0 398.387 321.707   1
 -13  -4   1 2619.30 538.821   1
 -13  -4   2-62.0337 235.028   1
 -13  -4   3 1219.51 396.268   1
 -13  -4   4 367.488 282.836   1
 -13  -5  -7 978.915 451.821   1
 -13  -5  -6 3517.79 772.781   1
 -13  -5  -5 904.262 405.299   1
 -13  -5  -4 7947.48 995.501   1
 -13  -5  -3 3577.81 684.496   1
 -13  -5  -2 16793.8 1354.70   1
 -13  -5  -1 5863.44 813.457   1
 -13  -5   0 26076.9 1583.47   1
 -13  -5   1 6607.63 822.984   1
 -13  -5   2 17153.2 1267.73   1
 -13  -5   3 4328.02 664.314   1
 -13  -5   4 7579.74 801.753   1
 -13  -6  -6 32.7854 352.959   1
 -13  -6  -5 1217.96 420.718   1
 -13  -6  -4 424.358 347.264   1
 -13  -6  -3 5239.22 826.115   1
 -13  -6  -2 757.572 397.743   1
 -13  -6  -1 8896.39 994.706   1
 -13  -6   0 1127.82 469.608   1
 -13  -6   1 8746.42 958.516   1
 -13  -6   2 942.128 392.554   1
 -13  -6   3 5357.92 720.964   1
 -13  -6   4 337.297 277.288   1
 -13  -7  -6 1988.70 584.928   1
 -13  -7  -5 623.224 487.888   1
 -13  -7  -4 1899.59 560.399   1
 -13  -7  -3 664.408 406.721   1
 -13  -7  -2 5081.96 803.697   1
 -13  -7  -1 1094.51 443.876   1
 -13  -7   0 8052.68 967.719   1
 -13  -7   1 3271.16 618.070   1
 -13  -7   2 4953.16 732.622   1
 -13  -7   3 88.1382 341.204   1
 -13  -7   4 2161.73 470.757   1
 -13  -8  -5 1583.54 554.390   1
 -13  -8  -4 457.588 379.505   1
 -13  -8  -3 4932.04 913.163   1
 -13  -8  -2 261.633 445.691   1
 -13  -8  -1 5602.55 892.875   1
 -13  -8   0 513.034 429.554   1
 -13  -8   1 5623.37 812.146   1
 -13  -8   2 568.475 338.855   1
 -13  -8   3 4486.24 733.963   1
 -13  -9  -4 1425.38 524.339   1
 -13  -9  -3 772.866 502.431   1
 -13  -9  -2 1225.06 491.643   1
 -13  -9  -1 449.777 443.513   1
 -13  -9   0 1645.27 558.959   1
 -13  -9   1 378.732 292.902   1
 -13  -9   2 1659.71 470.536   1
 -13  -9   3 144.841 374.764   1
 -13 -10  -2-182.069 445.729   1
 -13 -10  -1 3130.44 730.614   1
 -13 -10   0 299.800 307.893   1
 -13 -10   1 3530.75 704.766   1
 -13 -10   2 814.488 401.220   1
 -13 -10   3 1430.07 518.478   1
 -13 -11   0 31.5084 403.568   1
 -13 -11   1 975.564 477.682   1
 -13 -11   2 1219.99 573.710   1
 -13 -11   3 53.2281 404.815   1
 -14   0  -6 1920.25 574.368   1
 -14   0  -5 5324.02 830.757   1
 -14   0  -4 7091.78 940.660   1
 -14   0  -3 12263.6 1180.37   1
 -14   0  -2 9452.84 1038.88   1
 -14   0  -1 24290.9 1577.51   1
 -14   0   0 13009.3 1143.38   1
 -14   0   1 25901.9 1548.46   1
 -14   0   2 9983.24 957.671   1
 -14  -1  -7-685.705 420.368   1
 -14  -1  -6-432.527 480.099   1
 -14  -1  -5 605.243 427.359   1
 -14   1  -5-319.092 393.576   1
 -14  -1  -4-334.803 342.874   1
 -14   1  -4 1.17135 300.378   1
 -14   1  -3 402.489 395.169   1
 -14  -1  -3-190.562 360.868   1
 -14   1  -2-24.8738 343.926   1
 -14  -1  -2 175.461 289.788   1
 -14   1  -1 1182.12 417.709   1
 -14  -1  -1 1271.94 446.037   1
 -14  -1   0 450.606 389.152   1
 -14   1   0 179.227 298.385   1
 -14  -1   1 975.707 371.508   1
 -14   1   1 752.487 362.424   1
 -14  -1   2 199.521 298.216   1
 -14  -1   3 644.698 308.424   1
  14  -1   7-244.863 311.518   3
 -14  -2  -7 822.777 461.629   1
 -14  -2  -6 3671.42 739.749   1
 -14  -2  -5 3265.11 702.255   1
 -14  -2  -4 9901.27 1111.57   1
 -14  -2  -3 7273.62 921.377   1
 -14  -2  -2 20054.8 1456.92   1
 -14  -2  -1 10727.9 1037.30   1
 -14  -2   0 24221.1 1530.60   1
 -14  -2   1 10159.4 996.414   1
 -14  -2   2 22196.2 1371.10   1
 -14  -2   3 7444.45 803.438   1
 -14  -2   4 9694.22 895.999   1
  14  -2   7 867.476 474.989   3
 -14  -3  -7 441.662 381.564   1
 -14  -3  -6 212.220 348.132   1
 -14  -3  -5 505.345 406.683   1
 -14  -3  -4 2943.56 624.775   1
 -14  -3  -3 924.043 466.094   1
 -14  -3  -2 5558.40 821.986   1
 -14  -3  -1-373.339 271.185   1
 -14  -3   0 5032.16 733.774   1
 -14  -3   1 500.996 374.621   1
 -14  -3   2 5207.68 721.415   1
 -14  -3   3 528.532 367.697   1
 -14  -3   4 2710.06 488.700   1
  14  -3   6 131.681 344.425   3
 -14  -4  -7 597.455 365.551   1
 -14  -4  -6 1638.12 582.143   1
 -14  -4  -5 2969.98 702.589   1
 -14  -4  -4 3236.69 685.956   1
 -14  -4  -3 9374.90 1067.41   1
 -14  -4  -2 7551.71 933.012   1
 -14  -4  -1 10620.9 1075.06   1
 -14  -4   0 8809.69 943.567   1
 -14  -4   1 11715.2 1059.22   1
 -14  -4   2 7292.29 843.872   1
 -14  -4   3 7931.30 884.416   1
 -14  -4   4 3675.34 574.830   1
 -14  -5  -6-85.5507 383.077   1
 -14  -5  -5 983.801 444.079   1
 -14  -5  -4 1091.99 434.285   1
 -14  -5  -3 694.697 306.120   1
 -14  -5  -2 2148.73 591.302   1
 -14  -5  -1 2779.29 649.630   1
 -14  -5   0 3284.61 632.985   1
 -14  -5   1 1409.20 457.381   1
 -14  -5   2 2715.98 564.031   1
 -14  -5   3 1464.14 426.835   1
 -14  -5   4 986.630 386.458   1
 -14  -6  -5 954.706 455.101   1
 -14  -6  -4 965.882 448.388   1
 -14  -6  -3 4419.02 791.873   1
 -14  -6  -2 3321.73 646.340   1
 -14  -6  -1 6226.26 877.584   1
 -14  -6   0 2559.33 616.856   1
 -14  -6   1 5590.15 803.818   1
 -14  -6   2 2915.13 594.293   1
 -14  -6   3 4286.17 694.791   1
 -14  -7  -5 552.699 418.302   1
 -14  -7  -4 1268.84 538.497   1
 -14  -7  -3 1682.29 500.382   1
 -14  -7  -2 2117.64 624.896   1
 -14  -7  -1 1601.04 556.340   1
 -14  -7   0 3196.17 705.590   1
 -14  -7   1 1119.05 472.486   1
 -14  -7   2 2723.26 588.699   1
 -14  -7   3 409.010 347.121   1
 -14  -8  -4 777.749 483.003   1
 -14  -8  -3 673.554 432.842   1
 -14  -8  -2 1183.79 559.675   1
 -14  -8  -1 2651.48 684.923   1
 -14  -8   0 1320.23 509.729   1
 -14  -8   1 2595.69 617.936   1
 -14  -8   2 349.027 361.401   1
 -14  -8   3 560.803 374.518   1
 -14  -9  -2 2595.77 672.641   1
 -14  -9  -1 1863.46 642.562   1
 -14  -9   0 3256.57 706.921   1
 -14  -9   1 1548.05 582.803   1
 -14  -9   2 2252.09 600.270   1
 -14  -9   3 471.250 381.353   1
 -14 -10  -1 159.243 384.439   1
 -14 -10   0 562.722 464.759   1
 -14 -10   1-249.734 419.499   1
 -14 -10   2-276.964 452.511   1
 -14 -10   3 641.909 456.992   1
 -15   0  -6 436.178 345.556   1
 -15   0  -5 90.4149 366.167   1
 -15   0  -4-141.685 410.035   1
 -15   0  -3 263.809 416.047   1
 -15   0  -2-53.9336 393.757   1
 -15   0  -1-272.667 385.481   1
 -15   0   0-43.0364 357.229   1
 -15   0   1-124.962 278.187   1
 -15   0   2 722.329 372.041   1
 -15  -1  -7 481.771 344.471   1
 -15  -1  -6 325.902 429.830   1
 -15  -1  -5 1891.52 504.649   1
 -15   1  -5 1583.01 541.468   1
 -15  -1  -4 3804.41 717.454   1
 -15   1  -4 4130.77 780.986   1
 -15  -1  -3 4871.55 806.451   1
 -15   1  -3 4048.52 744.825   1
 -15   1  -2 11227.2 1153.36   1
 -15  -1  -2 10196.9 1059.67   1
 -15  -1  -1 6450.86 821.372   1
 -15   1  -1 6841.08 878.564   1
 -15   1   0 11921.8 1147.04   1
 -15  -1   0 13033.5 1175.76   1
 -15  -1   1 6151.09 817.297   1
 -15   1   1 5949.39 780.570   1
 -15  -1   2 8779.31 949.286   1
 -15  -1   3 4773.01 689.373   1
 -15  -2  -6 649.805 453.946   1
 -15  -2  -5 257.270 381.047   1
 -15  -2  -4 927.778 459.242   1
 -15  -2  -3 1907.80 517.666   1
 -15  -2  -2 204.258 269.185   1
 -15  -2  -1 3151.43 613.715   1
 -15  -2   0 384.451 362.344   1
 -15  -2   1 2012.43 511.426   1
 -15  -2   2 318.416 327.813   1
 -15  -2   3 966.031 367.078   1
 -15  -2   4-264.469 292.805   1
  15  -2   7 252.242 417.912   3
 -15  -3  -6 199.625 360.482   1
 -15  -3  -5 1782.00 563.743   1
 -15  -3  -4 1892.47 537.548   1
 -15  -3  -3 3308.39 712.509   1
 -15  -3  -2 5345.87 859.943   1
 -15  -3  -1 7356.35 953.134   1
 -15  -3   0 7486.15 903.936   1
 -15  -3   1 6306.95 827.173   1
 -15  -3   2 6093.83 844.100   1
 -15  -3   3 3211.01 618.915   1
 -15  -3   4 2477.59 521.846   1
 -15  -4  -6 504.187 433.479   1
 -15  -4  -5 316.236 327.224   1
 -15  -4  -4 434.027 455.343   1
 -15  -4  -3 969.155 500.776   1
 -15  -4  -2 1467.67 500.578   1
 -15  -4  -1 1165.56 432.990   1
 -15  -4   0 1892.00 506.752   1
 -15  -4   1 878.982 451.966   1
 -15  -4   2 1478.14 394.912   1
 -15  -4   3 1074.64 478.923   1
 -15  -5  -5 1691.46 613.596   1
 -15  -5  -4 1815.52 591.907   1
 -15  -5  -3 3035.48 708.780   1
 -15  -5  -2 3443.19 677.451   1
 -15  -5  -1 4542.56 797.199   1
 -15  -5   0 3278.84 679.169   1
 -15  -5   1 5433.80 797.416   1
 -15  -5   2 4601.29 762.420   1
 -15  -5   3 4011.38 670.246   1
 -15  -6  -4 1080.52 512.923   1
 -15  -6  -3 1321.65 564.097   1
 -15  -6  -2 2573.38 627.349   1
 -15  -6  -1 2471.38 622.698   1
 -15  -6   0 1362.01 459.440   1
 -15  -6   1 2753.74 599.092   1
 -15  -6   2 2619.66 617.749   1
 -15  -6   3 546.432 362.436   1
 -15  -7  -4 1496.49 609.269   1
 -15  -7  -3 1490.40 618.742   1
 -15  -7  -2 2190.32 630.758   1
 -15  -7  -1 3307.78 718.139   1
 -15  -7   0 3188.61 706.698   1
 -15  -7   1 2955.99 656.731   1
 -15  -7   2 2185.89 586.694   1
 -15  -7   3 2029.90 554.098   1
 -15  -8  -3-217.691 406.696   1
 -15  -8  -2 695.466 426.558   1
 -15  -8  -1 1941.13 641.256   1
 -15  -8   0 1249.97 487.653   1
 -15  -8   1 1114.74 495.015   1
 -15  -8   2 1337.35 512.574   1
 -15  -8   3 206.362 353.522   1
 -15  -9  -1-901.392 539.344   1
 -15  -9   0 1124.33 499.409   1
 -15  -9   1 271.205 353.800   1
 -15  -9   2 495.289 430.312   1
 -15  -9   3 849.068 442.290   1
 -15 -10   1 2283.18 617.389   1
 -15 -10   2 1201.35 510.000   1
 -15 -10   3 621.232 350.079   1
 -16   0  -6 1611.91 552.520   1
 -16   0  -5 1171.11 506.817   1
 -16   0  -4 4719.25 833.622   1
 -16   0  -3 1864.55 629.382   1
 -16   0  -2 7183.49 953.825   1
 -16   0  -1 2324.64 623.456   1
 -16   0   0 10563.7 1137.58   1
 -16   0   1 4309.80 759.955   1
 -16   0   2 9384.77 1036.06   1
 -16  -1  -6 187.295 334.802   1
 -16  -1  -5 1535.65 516.171   1
 -16   1  -4 357.380 410.242   1
 -16  -1  -4-152.755 396.686   1
 -16  -1  -3 724.429 402.307   1
 -16   1  -3 29.1265 363.530   1
 -16  -1  -2-723.155 487.334   1
 -16   1  -2 190.834 316.000   1
 -16  -1  -1 255.893 343.922   1
 -16   1  -1 484.887 483.745   1
 -16   1   0 114.807 313.539   1
 -16  -1   0-185.144 363.902   1
 -16  -1   1-25.4396 273.711   1
 -16  -1   2-283.287 338.123   1
 -16  -1   3 121.991 286.563   1
 -16  -2  -5 1693.03 593.508   1
 -16  -2  -4 3215.52 760.006   1
 -16  -2  -3 2759.46 634.505   1
 -16  -2  -2 5089.86 787.896   1
 -16  -2  -1 6443.12 905.257   1
 -16  -2   0 7548.42 976.523   1
 -16  -2   1 4462.90 702.112   1
 -16  -2   2 6620.45 852.842   1
 -16  -2   3 5303.93 774.933   1
 -16  -3  -5 183.090 318.891   1
 -16  -3  -4 459.819 406.131   1
 -16  -3  -3 767.868 411.810   1
 -16  -3  -2 457.545 350.539   1
 -16  -3  -1 1382.76 530.347   1
 -16  -3   0-153.619 285.255   1
 -16  -3   1 1241.59 490.663   1
 -16  -3   2 486.214 381.203   1
 -16  -3   3 886.909 424.752   1
 -16  -4  -5 128.483 468.791   1
 -16  -4  -4 1820.74 585.896   1
 -16  -4  -3 1361.65 576.837   1
 -16  -4  -2 5040.17 863.304   1
 -16  -4  -1 3632.73 736.364   1
 -16  -4   0 5890.84 888.756   1
 -16  -4   1 3924.99 678.540   1
 -16  -4   2 4844.23 781.622   1
 -16  -4   3 1766.42 455.042   1
 -16  -5  -4-1085.81 585.685   1
 -16  -5  -3 569.387 507.949   1
 -16  -5  -2 1589.46 584.323   1
 -16  -5  -1 121.584 319.317   1
 -16  -5   0 1135.60 503.445   1
 -16  -5   1 491.227 386.331   1
 -16  -5   2 568.475 392.015   1
 -16  -5   3 1402.09 457.454   1
 -16  -6  -3 525.390 324.594   1
 -16  -6  -2 1700.46 586.644   1
 -16  -6  -1 521.539 390.056   1
 -16  -6   0 1260.75 529.519   1
 -16  -6   1-379.588 420.002   1
 -16  -6   2 1875.53 561.254   1
 -16  -6   3 244.134 323.333   1
 -16  -7  -2 341.473 476.186   1
 -16  -7  -1 583.024 439.166   1
 -16  -7   0 1301.01 508.312   1
 -16  -7   1 240.227 344.740   1
 -16  -7   2 1357.05 511.311   1
 -16  -7   3 672.846 442.943   1
 -16  -8  -1 562.704 474.134   1
 -16  -8   0 229.382 414.803   1
 -16  -8   1-92.4642 319.651   1
 -16  -8   2 1043.19 577.734   1
 -16  -8   3 1204.70 444.947   1
 -16  -9   1 509.756 428.847   1
 -16  -9   2-63.9367 349.729   1
 -16  -9   3-288.189 372.764   1
 -17   0  -5-381.558 480.129   1
 -17   0  -4 527.837 460.364   1
 -17   0  -3 146.127 371.007   1
 -17   0  -2 429.204 386.846   1
 -17   0  -1-83.4137 379.929   1
 -17   0   0 109.915 370.519   1
 -17   0   1-211.978 380.763   1
 -17   0   2-325.872 387.911   1
 -17  -1  -5 1392.46 495.405   1
 -17   1  -4 1323.81 585.779   1
 -17  -1  -4 288.073 407.547   1
 -17   1  -3 6440.24 956.564   1
 -17  -1  -3 6343.92 970.587   1
 -17  -1  -2 1486.67 516.520   1
 -17   1  -2 2232.90 597.722   1
 -17  -1  -1 8886.97 1071.41   1
 -17   1  -1 8537.14 1096.55   1
 -17   1   0 1864.22 546.607   1
 -17  -1   0 2233.74 612.599   1
 -17  -1   1 9662.34 1087.74   1
 -17  -1   2 802.273 432.361   1
 -17  -1   3 8347.02 965.154   1
 -17  -2  -4-291.849 359.029   1
 -17  -2  -3 450.379 390.411   1
 -17  -2  -2 172.542 323.535   1
 -17  -2  -1 426.624 355.194   1
 -17  -2   0 56.9396 324.172   1
 -17  -2   1-18.0215 294.116   1
 -17  -2   2-8.82805 340.257   1
 -17  -2   3-430.888 366.182   1
 -17  -3  -4 58.3482 367.778   1
 -17  -3  -3 3908.56 805.873   1
 -17  -3  -2 656.686 403.584   1
 -17  -3  -1 4506.56 840.026   1
 -17  -3   0 1610.15 579.430   1
 -17  -3   1 5270.14 819.069   1
 -17  -3   2 265.863 327.444   1
 -17  -3   3 4451.25 741.371   1
 -17  -4  -4 1729.44 641.761   1
 -17  -4  -3 508.947 494.059   1
 -17  -4  -2 749.394 384.022   1
 -17  -4  -1-42.8996 269.794   1
 -17  -4   0 1168.02 517.903   1
 -17  -4   1-305.341 427.715   1
 -17  -4   2 321.851 395.818   1
 -17  -4   3 67.5893 287.607   1
 -17  -5  -3-57.4719 542.947   1
 -17  -5  -2 1196.29 502.948   1
 -17  -5  -1 2034.83 647.973   1
 -17  -5   0 797.358 399.177   1
 -17  -5   1 2320.15 593.998   1
 -17  -5   2 1070.81 470.547   1
 -17  -5   3 1159.88 441.554   1
 -17  -6  -2 1572.97 527.740   1
 -17  -6  -1 655.941 482.254   1
 -17  -6   0 1775.36 613.656   1
 -17  -6   1-184.062 426.334   1
 -17  -6   2 1476.74 543.960   1
 -17  -6   3 108.437 325.554   1
 -17  -7  -1 2565.94 700.883   1
 -17  -7   0 1387.08 538.722   1
 -17  -7   1 3810.12 762.466   1
 -17  -7   2 1505.62 514.574   1
 -17  -7   3 1497.13 550.605   1
 -17  -8   1 1460.26 595.512   1
 -17  -8   2 937.897 503.935   1
 -17  -8   3 424.606 355.694   1
 -18   0  -3-121.289 565.486   1
 -18   0  -2 1976.08 601.062   1
 -18   0  -1 361.782 351.412   1
 -18   0   0 1498.24 516.089   1
 -18   0   1-395.629 440.461   1
 -18   1  -3 130.922 484.465   1
 -18  -1  -3 638.171 494.819   1
 -18  -1  -2-38.5123 502.199   1
 -18   1  -2-345.826 356.393   1
 -18  -1  -1 137.710 338.777   1
 -18   1  -1-286.826 373.728   1
 -18  -1   0-352.454 370.036   1
 -18  -1   1 222.233 381.505   1
 -18  -1   2 483.665 423.830   1
 -18  -2  -3-625.792 541.223   1
 -18  -2  -2 3130.09 732.989   1
 -18  -2  -1 675.639 429.835   1
 -18  -2   0 3591.27 812.634   1
 -18  -2   1 1461.30 554.342   1
 -18  -2   2 3395.22 716.866   1
 -18  -2   3 252.092 322.758   1
 -18  -3  -3 537.549 440.562   1
 -18  -3  -2-237.197 287.086   1
 -18  -3  -1 74.3253 350.270   1
 -18  -3   0 610.102 454.724   1
 -18  -3   1 575.503 319.061   1
 -18  -3   2 44.3108 343.101   1
 -18  -3   3 147.304 306.025   1
 -18  -4  -2 2664.24 687.524   1
 -18  -4  -1 595.234 531.665   1
 -18  -4   0 3719.76 768.467   1
 -18  -4   1 1045.56 534.699   1
 -18  -4   2 2060.70 600.571   1
 -18  -4   3 548.099 410.708   1
 -18  -5  -2-175.985 445.544   1
 -18  -5  -1 1177.05 484.455   1
 -18  -5   0-75.1783 396.813   1
 -18  -5   1 100.413 363.690   1
 -18  -5   2 258.245 434.121   1
 -18  -5   3-272.217 440.421   1
 -18  -6   0 1820.76 573.362   1
 -18  -6   1-882.785 453.508   1
 -18  -6   2 1030.42 454.966   1
 -18  -6   3-1096.74 427.127   1
 -18  -7   1 434.862 444.642   1
 -18  -7   2 352.934 307.629   1
 -19   0  -2 185.264 396.260   1
 -19   0  -1 86.1220 379.292   1
 -19   0   0 482.297 367.083   1
 -19   0   1-188.572 321.682   1
 -19  -1  -2-370.721 488.579   1
 -19  -1  -1 3821.41 789.442   1
 -19  -1   0-103.339 366.760   1
 -19  -1   1 4187.82 822.900   1
 -19  -1   2-226.716 309.921   1
 -19  -2  -2-167.249 389.058   1
 -19  -2  -1 38.3958 399.978   1
 -19  -2   0-509.529 452.121   1
 -19  -2   1 422.672 345.317   1
 -19  -2   2 742.454 490.369   1
 -19  -2   3-631.499 388.884   1
 -19  -3  -1 1491.23 536.816   1
 -19  -3   0 208.744 355.933   1
 -19  -3   1 2086.33 644.663   1
 -19  -3   2 86.6194 375.354   1
 -19  -3   3 1636.08 538.827   1
 -19  -4  -1-361.548 419.868   1
 -19  -4   0 1189.28 467.511   1
 -19  -4   1-240.803 352.532   1
 -19  -4   2 657.444 430.436   1
 -19  -4   3 798.965 443.512   1
 -19  -5   0 46.2880 396.589   1
 -19  -5   1 2362.61 633.659   1
 -19  -5   2 432.828 329.096   1
 -19  -6   2-139.443 362.957   1
 -20   0   0 1192.45 561.424   1
 -20  -1   0 132.137 375.751   1
 -20  -1   1 178.112 381.490   1
 -20  -1   2-208.489 475.373   1
 -20  -2   0 2048.05 598.409   1
 -20  -2   1 417.899 300.412   1
 -20  -2   2 1683.24 660.303   1
 -20  -3   1-932.158 517.889   1
 -20  -3   2-459.019 563.590   1
 -20  -4   2 835.670 477.800   1
   0   0   0    0.00    0.00   0
TITL lxy0605-CF3I in Pna2(1)
REM Pna2(1) (#33, found as P2(1)cn in -cba setting)
CELL 0.71073  15.811923  11.430842   7.307353  90.0000  90.0000  90.0000
ZERR    5.00   0.001195   0.000530   0.000361   0.0000   0.0000   0.0000
LATT -1
SYMM -x,-y, z+1/2
SYMM  x+1/2,-y+1/2, z
SYMM -x+1/2, y+1/2, z+1/2
SFAC C H N F I
UNIT 50.00 50.00 5.00 15.00 5.00
TREF
HKLF 4
END
;
_shelx_hkl_checksum   63532
